# Supplementary material for: Palladium-catalyzed intramolecular C–H arylation of 2-halo-N-Boc-N-arylbenzamides for the synthesis of N–H phenanthridinones
Source: Royal Society of Chemistry journal article supplement (doi:10.1039/c8ra02099j), 2018-01-01
Supplement: c8ra02099j1.pdf [file c8ra02099j1.pdf]

Palladium-catalyzed intramolecular C-H arylation of  
2-halo-N-Boc-N-arylbenzamides for the synthesis of N-H  
phenanthridinones

Quan-Fang Hu, Tian-Tao Gao, Yao-Jie Shi, Qian Lei, Luo-Ting Yu\*

State Key Laboratory of Biotherapy and Cancer Center, West China Hospital, West China Medical School,

Sichuan University and Collaborative Innovation Center, Chengdu 610041, China

E-mail: [yuluot@scu.edu.cn](mailto:yuluot@scu.edu.cn)

## Contents

Copies of NMR Spectra of 30 N-H Phenanthridinones

S2

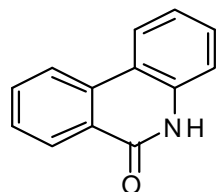

5aa

DMSO-D6

11.691  
8.526  
8.506  
8.407  
8.387  
8.341  
8.322  
7.881  
7.862  
7.845  
7.671  
7.652  
7.634  
7.516  
7.497  
7.479  
7.386  
7.366  
7.290  
7.271  
7.253  
3.341  
2.509  
-0.000

1.00

1.06  
1.97  
1.02  
0.40  
0.200

12 10 8 6 4 2 0 PPM

USER: fx -- DATE: 2017-05-04 11:41:44.226

|             |             |             |             |                                                             |
|-------------|-------------|-------------|-------------|-------------------------------------------------------------|
| F1: 400.160 | F2: 1.000   | SW1: 8224   | OF1: 3201.1 | PTS1d: 65536                                                |
| EX: zg30    | PW: 12.8 us | PD: 1.0 sec | NA: 16      | LB: 0.3 Nuts - \$sp-0011167-cpd1-H1-DMSO-20170504-CT54 10.1 |

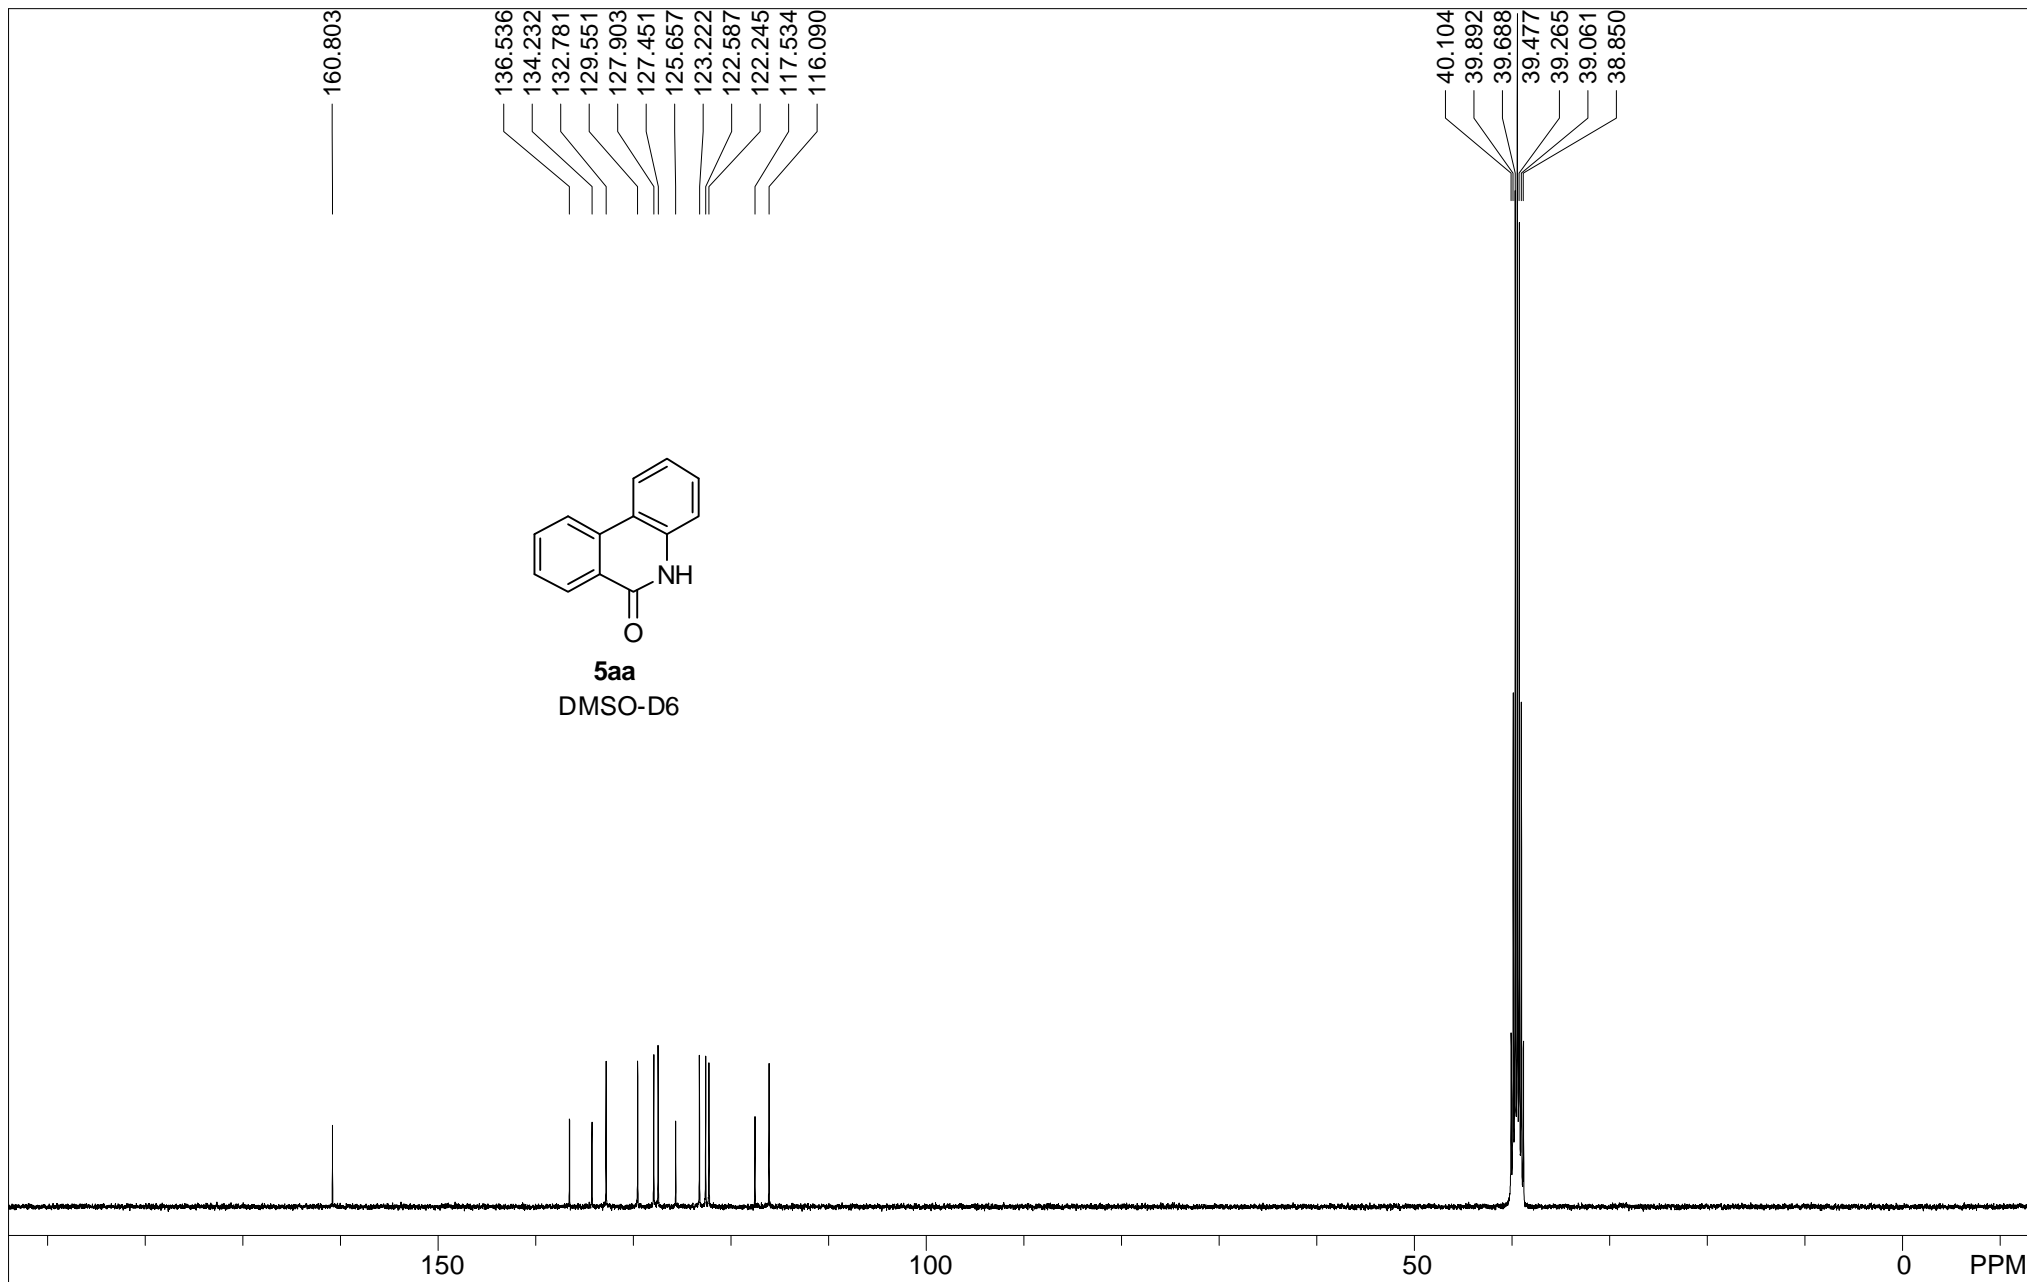

USER: fx -- DATE: 2017-05-05 08:56:00.144

|             |            |             |              |                                                            |
|-------------|------------|-------------|--------------|------------------------------------------------------------|
| F1: 100.620 | F2: 1.000  | SW1: 24038  | OF1: 10011.3 | PTS1d: 32768                                               |
| EX: zgpg30  | PW: 9.0 us | PD: 2.0 sec | NA: 1024     | LB: 100000 - \$SP-0011167-CPD1-C13-DMSO-20170504-CT54 10.1 |

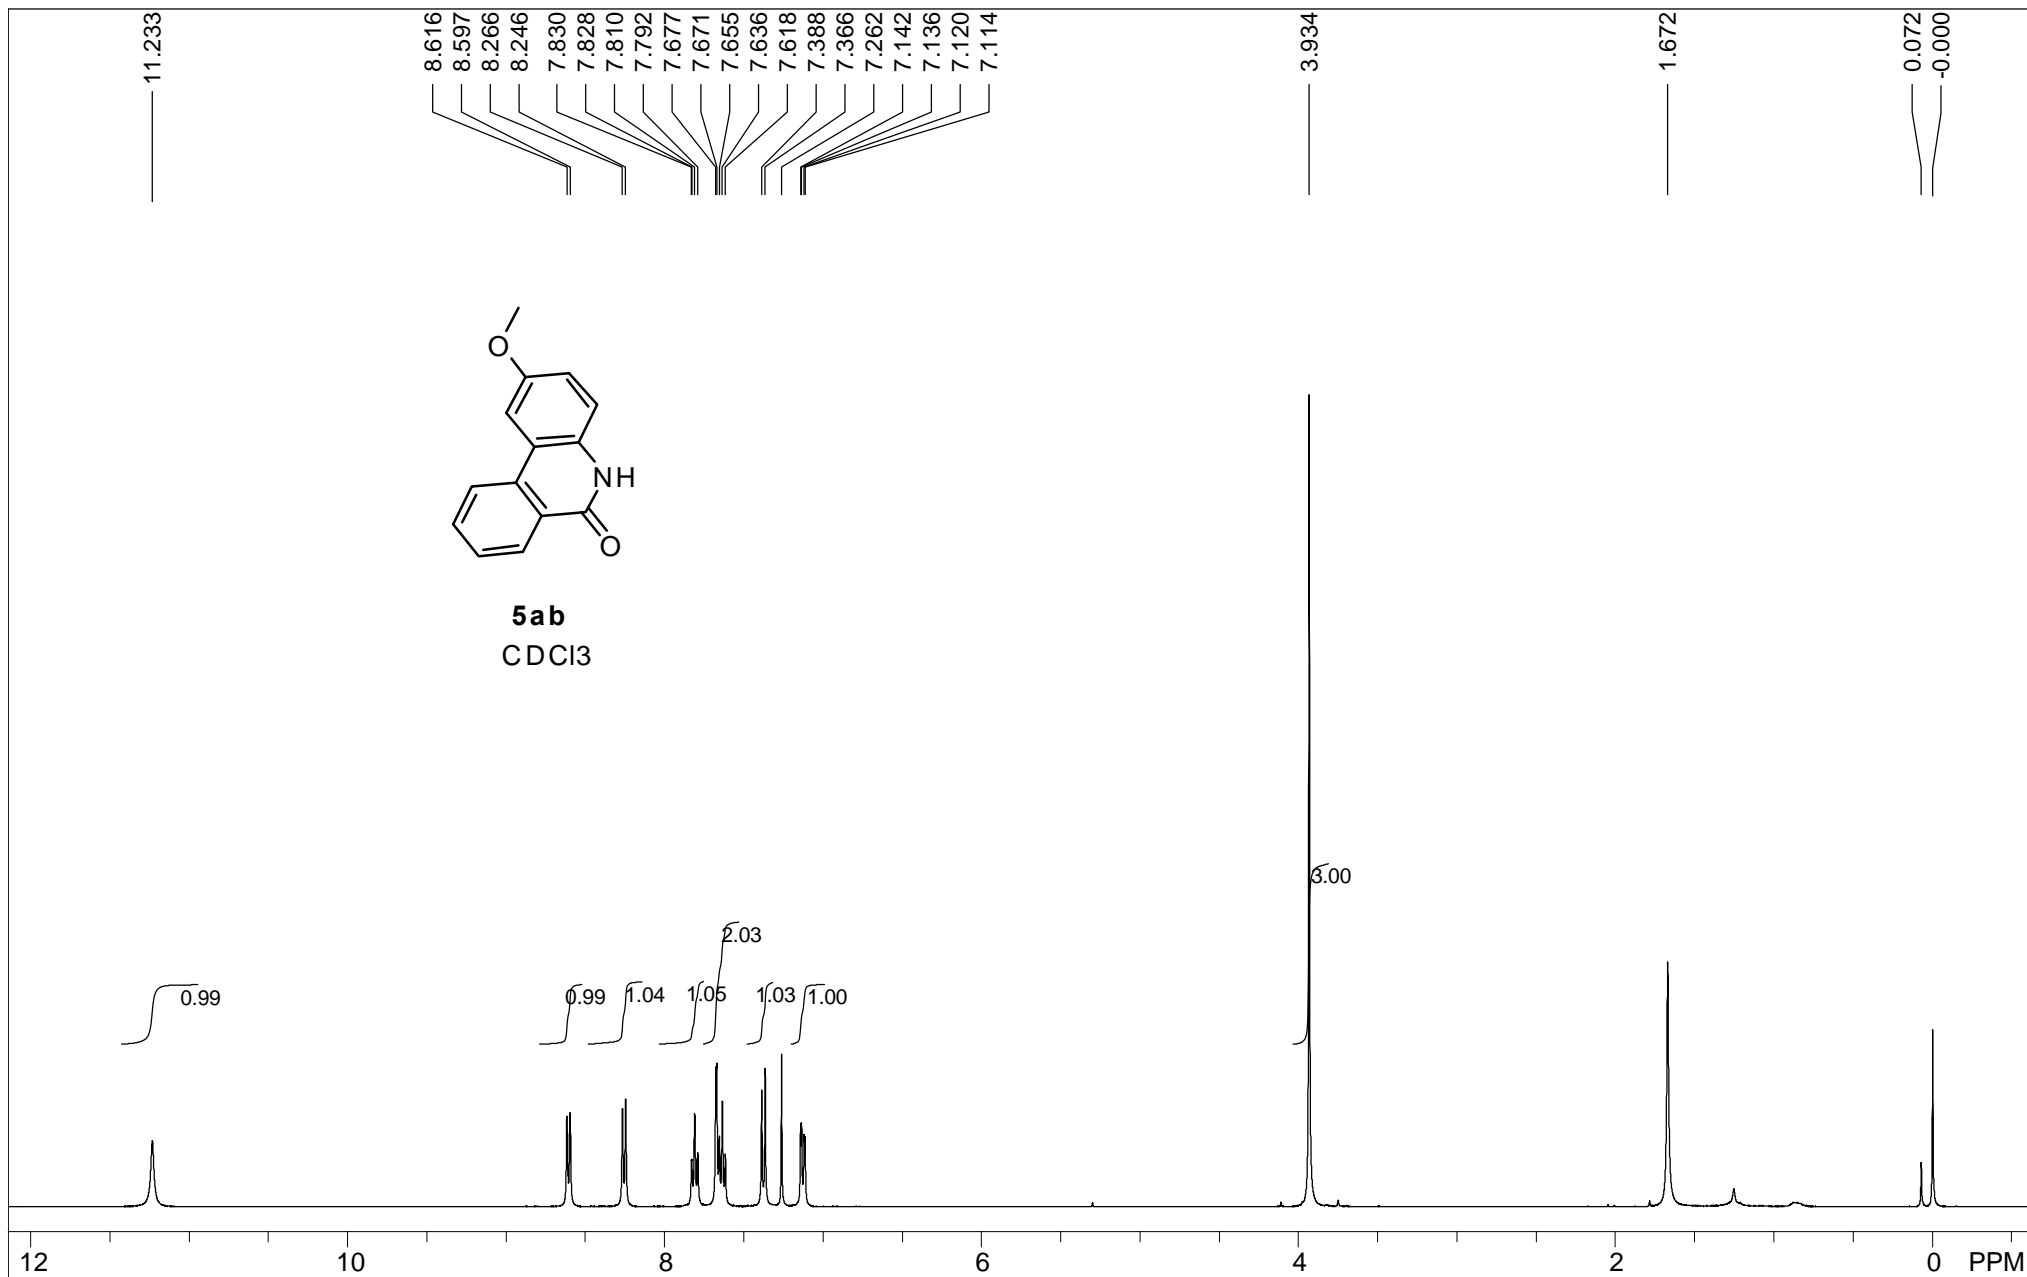

USER: fx -- DATE: 10:49:42.568 +0800 fx@FXPT-NMR-DT007

|             |             |             |             |                                                              |
|-------------|-------------|-------------|-------------|--------------------------------------------------------------|
| F1: 400.160 | F2: 1.000   | SW1: 8224   | OF1: 3193.4 | PTS1d: 65536                                                 |
| EX: zg30    | PW: 12.8 us | PD: 1.0 sec | NA: 16      | LB: 0.3 Nuts - \$\$P-0011167-BB5-H1-CDCI3-20160523-CT48 10.1 |

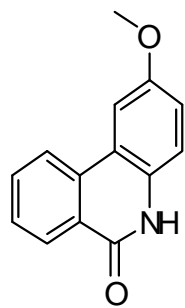

5ab

DMSO-D6

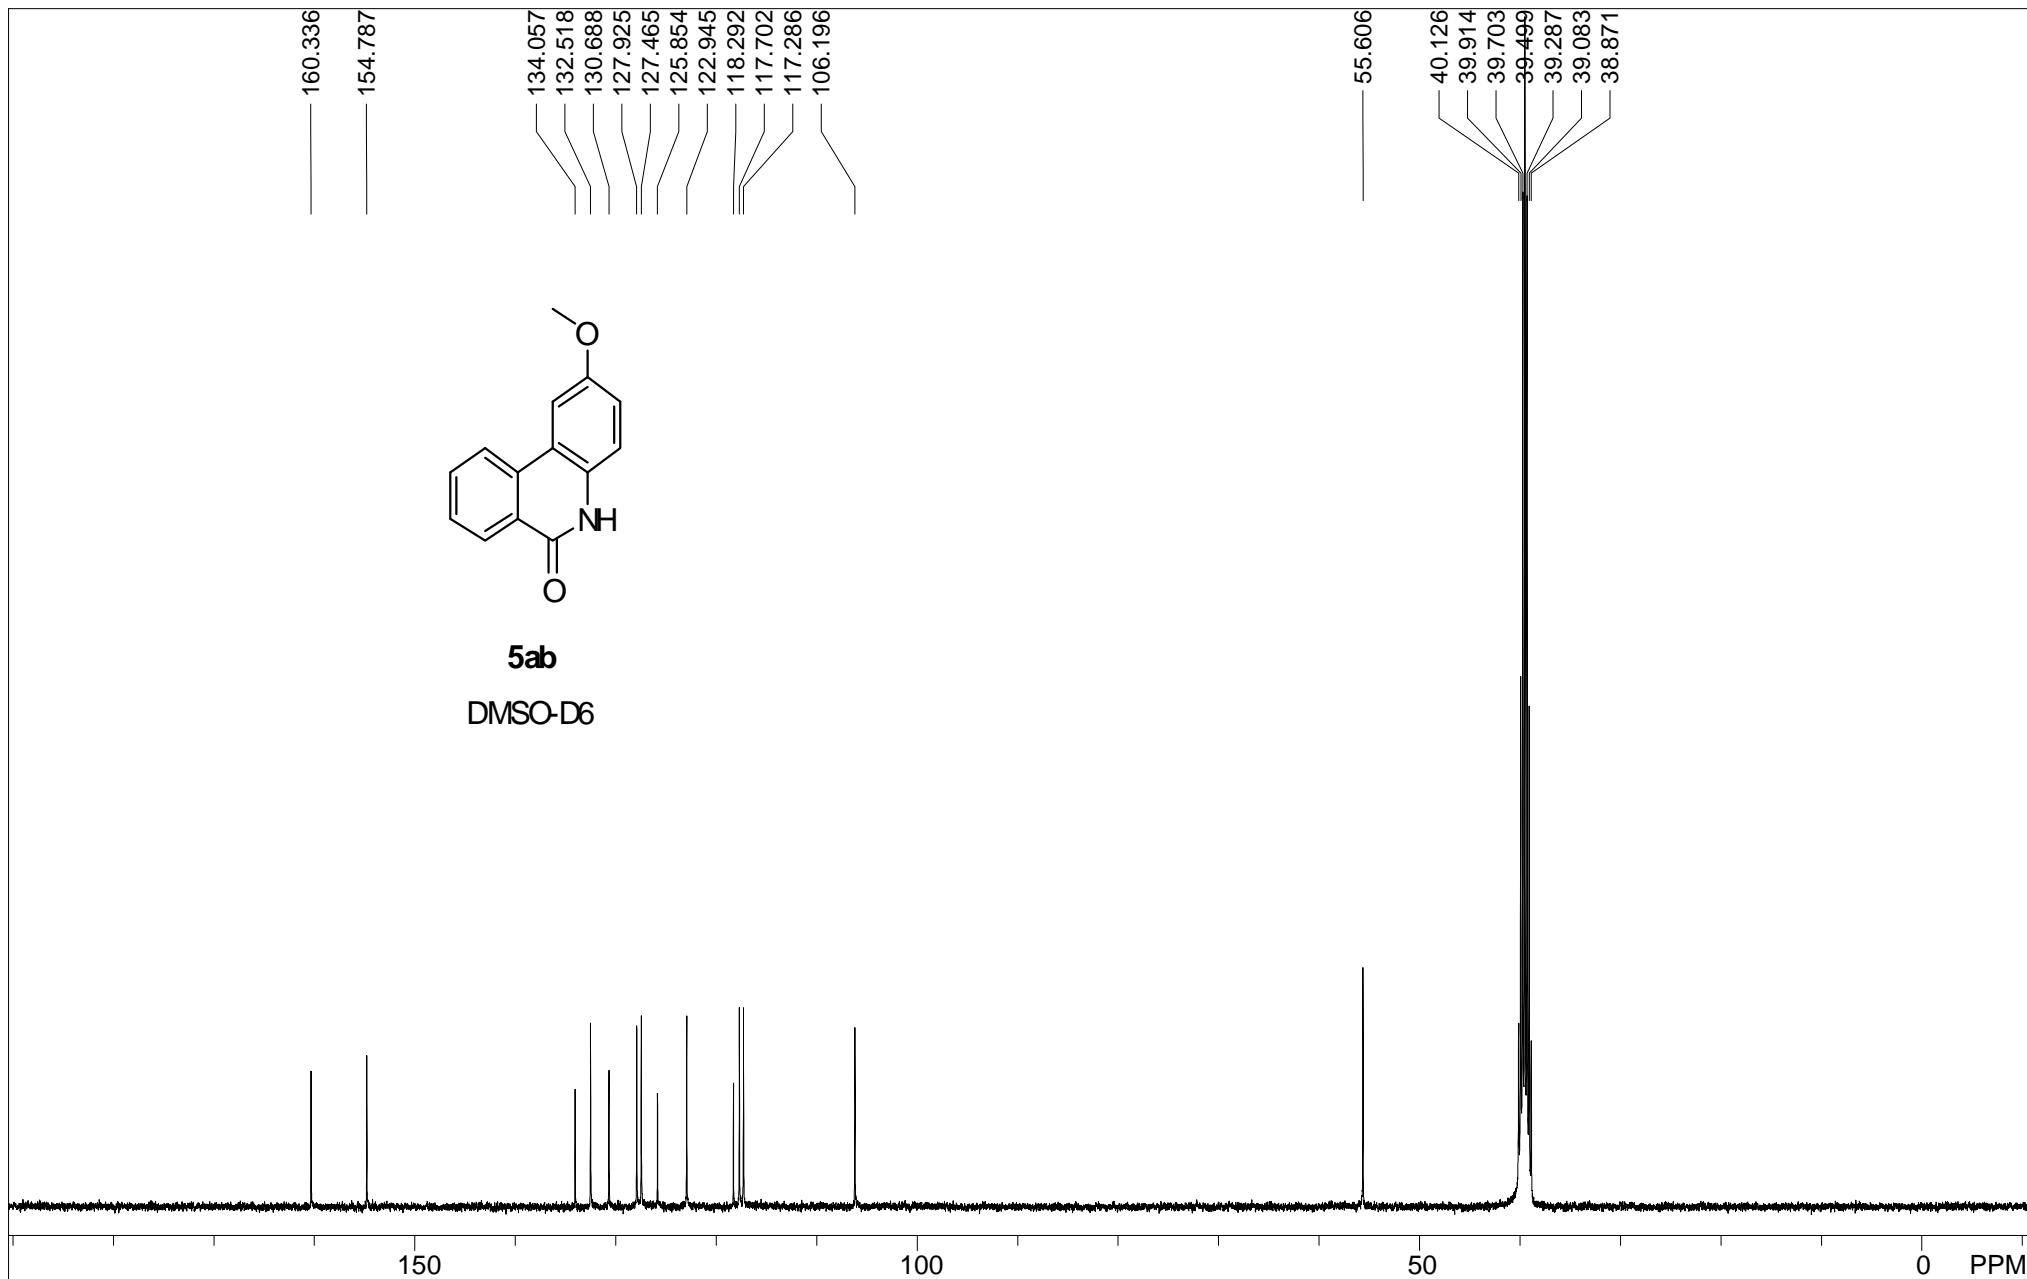

USER: fx -- DATE: 2017-07-12 06:07:14.757

|             |            |             |              |                                                            |
|-------------|------------|-------------|--------------|------------------------------------------------------------|
| F1: 100.620 | F2: 1.000  | SW1: 24038  | OF1: 10011.3 | PTS1d: 32768                                               |
| EX: zgpg30  | PW: 9.0 us | PD: 2.0 sec | NA: 1024     | LB: 1.0Nuts - \$SP-0011167-BB5-C13-DMSO-20170711-CT54 10.1 |

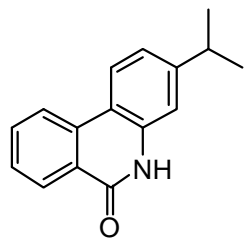

**5ae-a**  
DMSO-D6

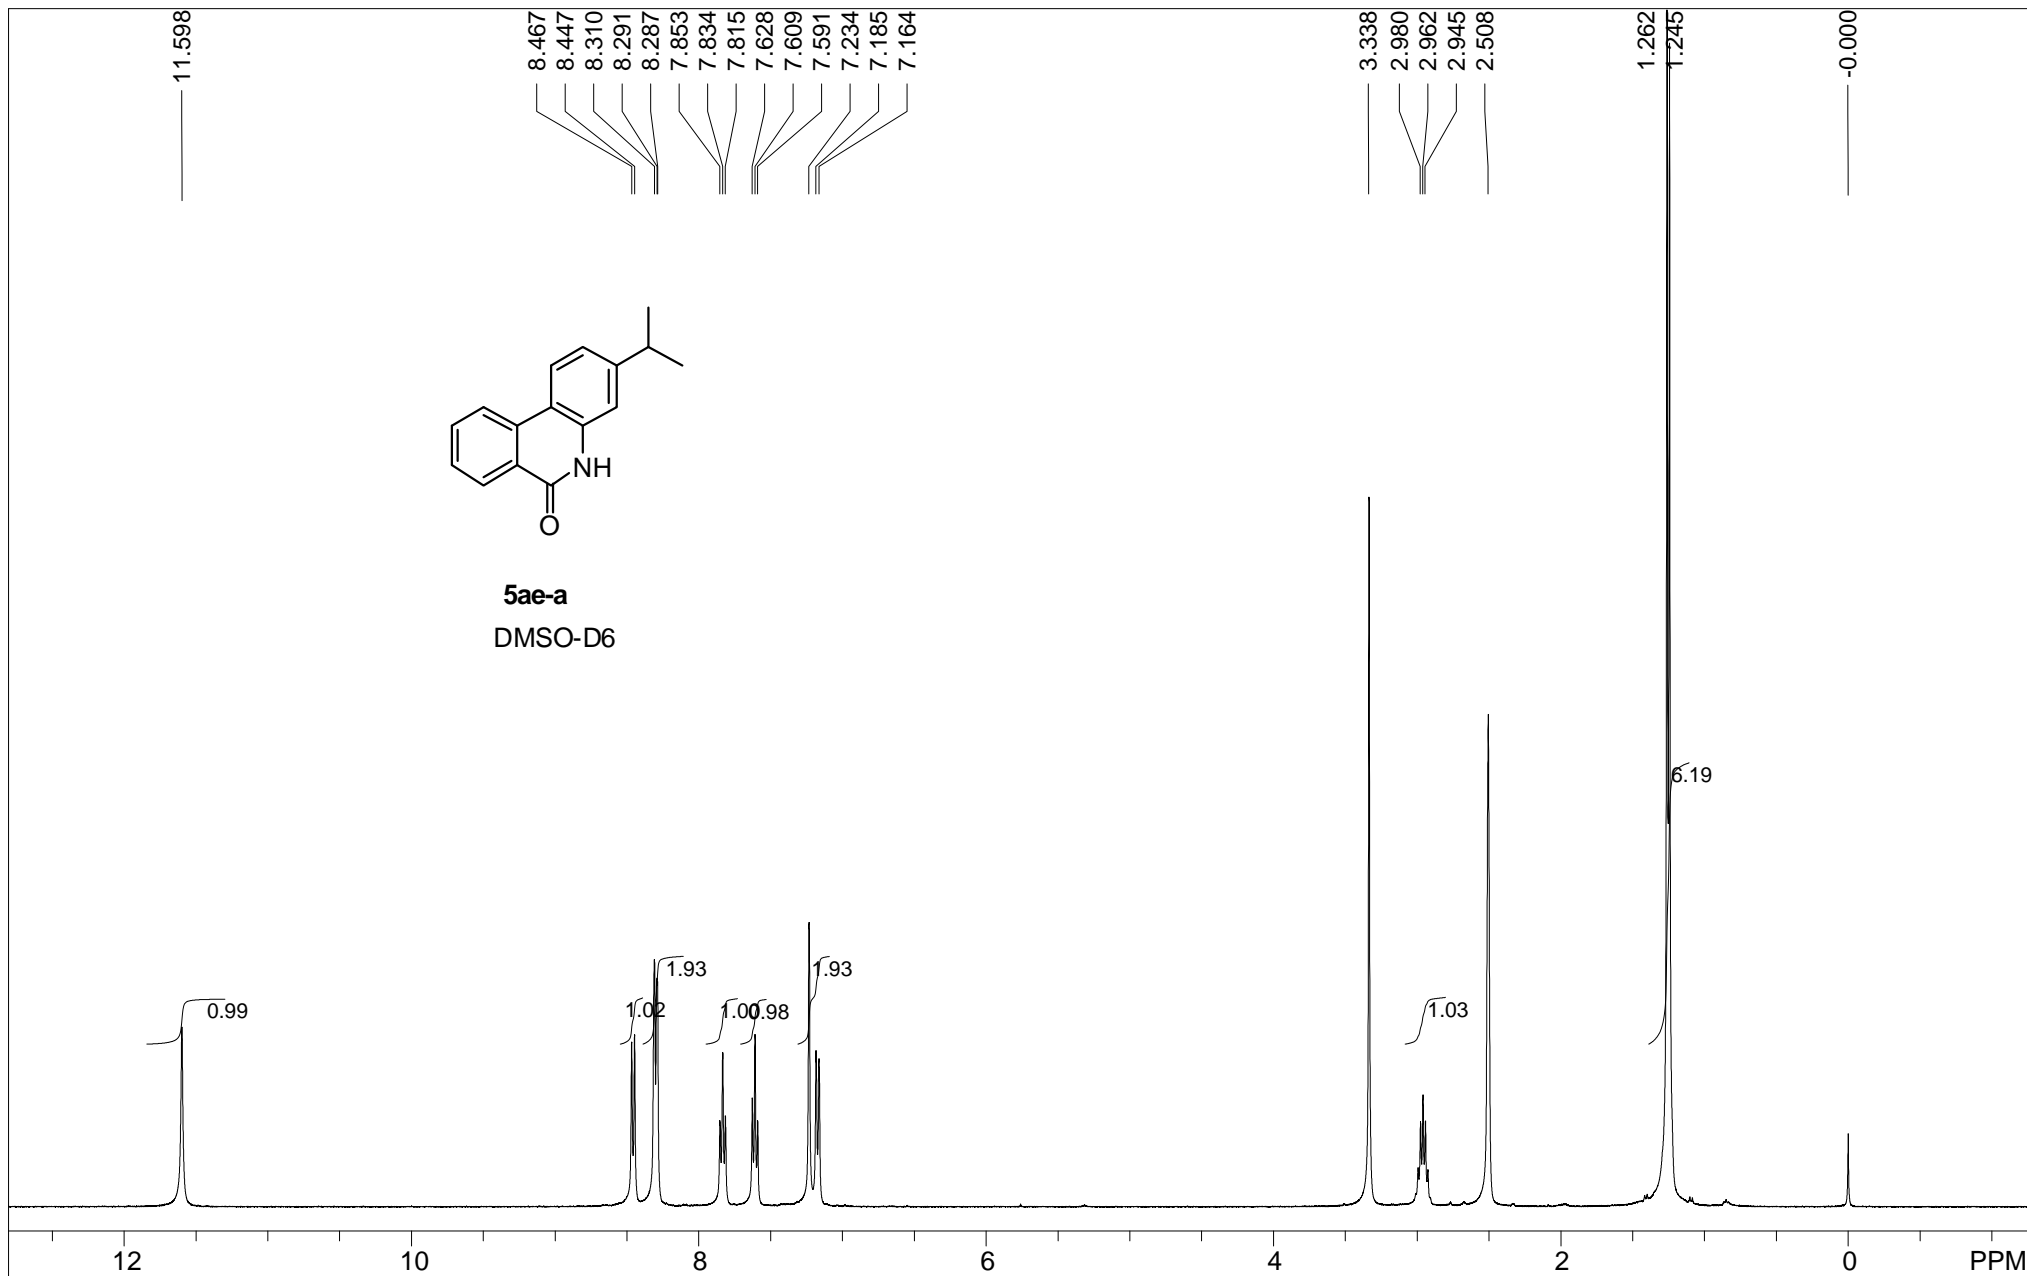

USER: fx -- DATE: 2017-05-19 10:26:23.164

|             |             |             |             |                             |
|-------------|-------------|-------------|-------------|-----------------------------|
| F1: 400.160 | F2: 1.000   | SW1: 8224   | OF1: 3200.9 | PTS1d: 65536                |
| EX: zg30    | PW: 12.8 us | PD: 1.0 sec | NA: 16      | LB: 0.3                     |
|             |             |             |             | Nuts - \$5ae-a-H1-DMSO 10.1 |



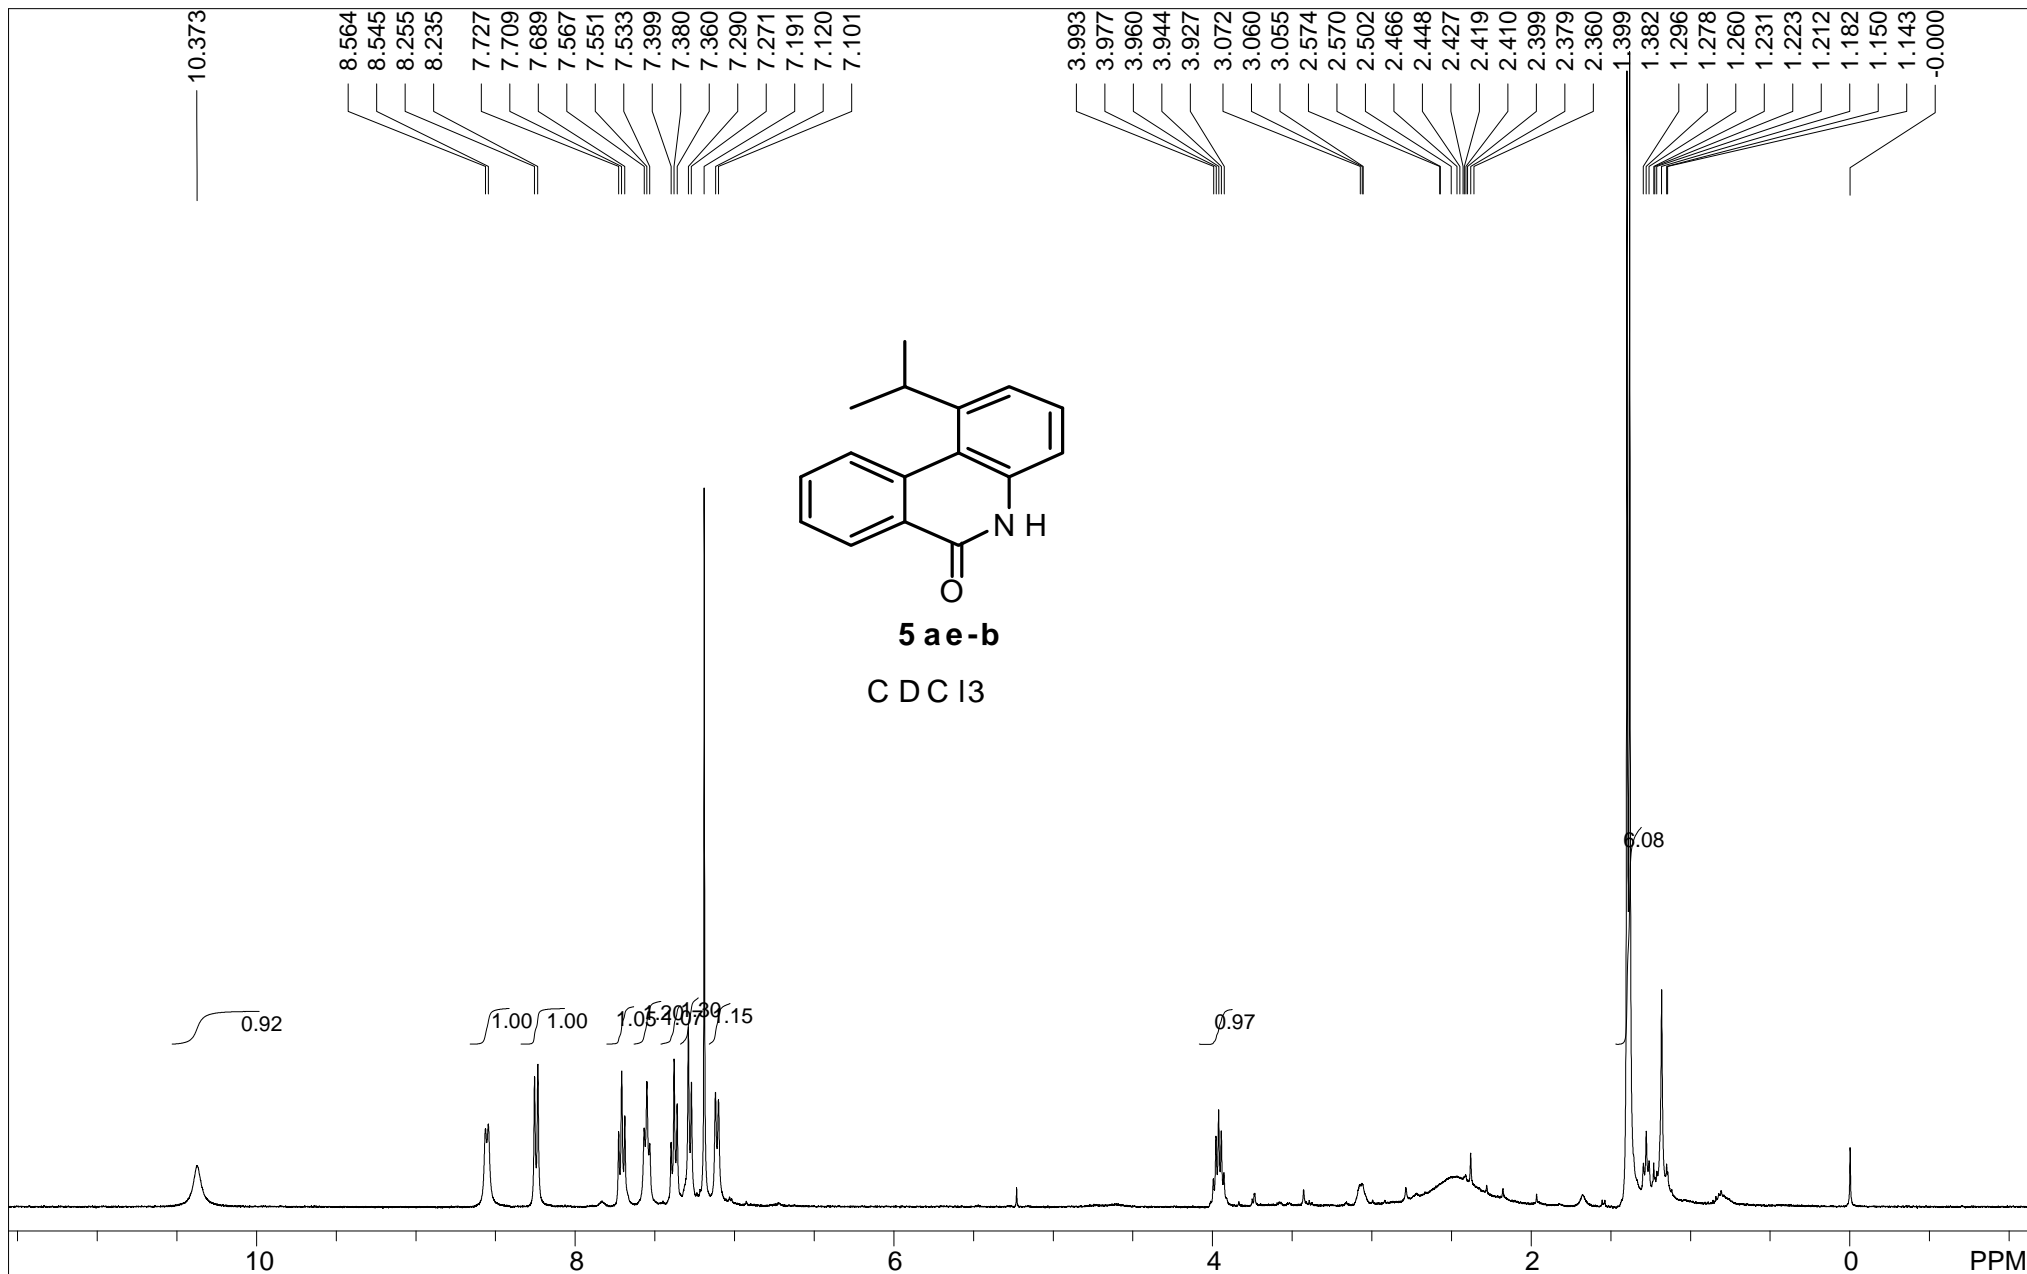

|                                           |           |             |             |             |              |                              |
|-------------------------------------------|-----------|-------------|-------------|-------------|--------------|------------------------------|
| USER: fx -- DATE: 2017-05-19 10:21:34.846 |           |             |             |             |              |                              |
| F1: 400.160                               | F2: 1.000 | SW1: 8224   | PD: 1.0 sec | OF1: 3164.8 | PTS1d: 65536 |                              |
| EX: zg30                                  |           | PW: 12.8 us |             | NA: 16      | LB: 0.3      | Nuts - \$5ae-b-H1-CDCl3 10.1 |



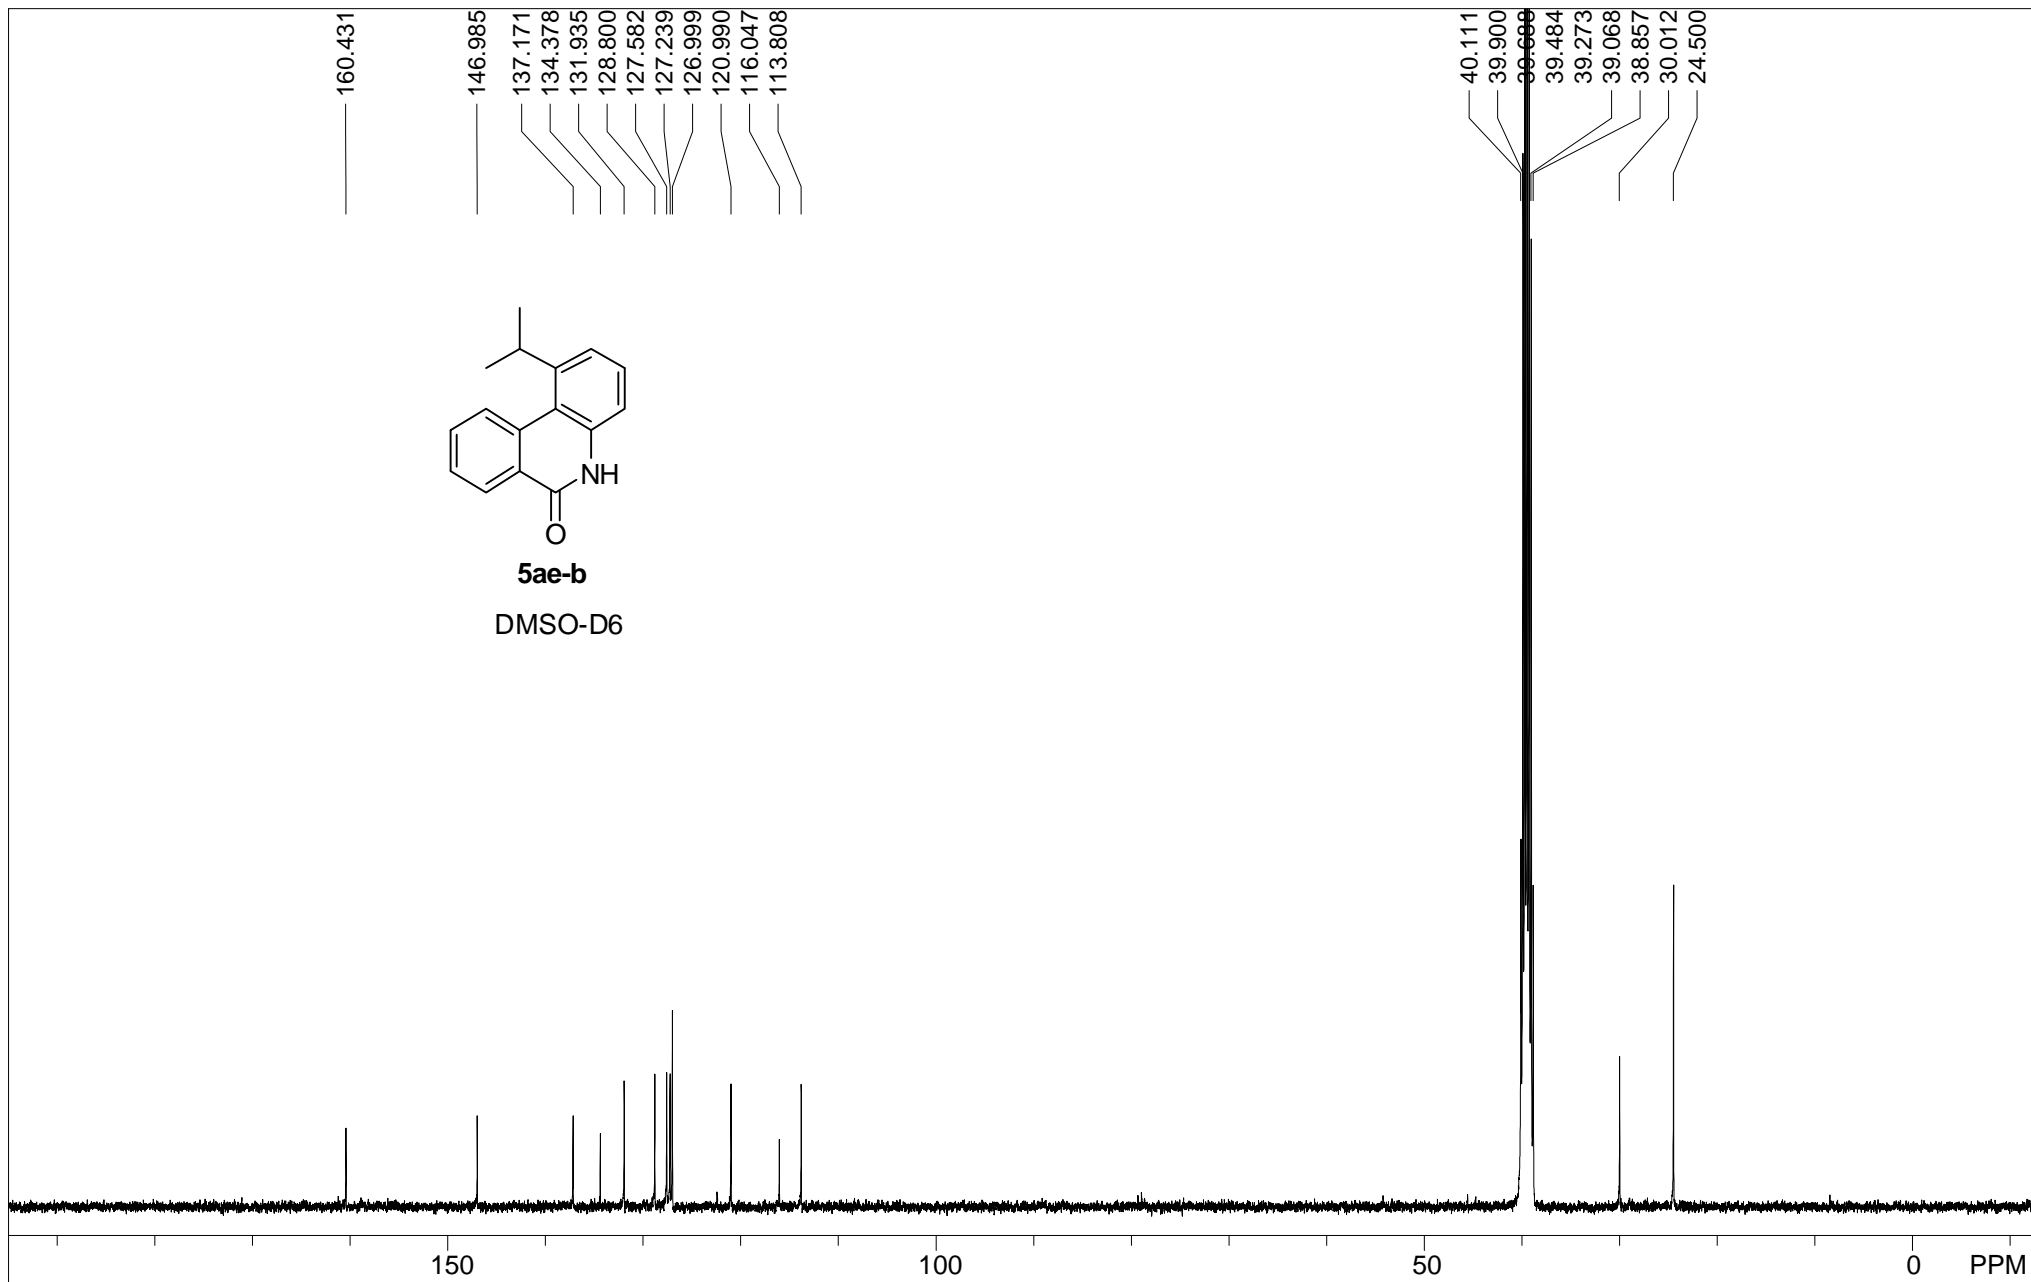

USER: fx -- DATE: 2017-05-19 21:27:54.641

|             |           |            |             |              |          |                                                       |
|-------------|-----------|------------|-------------|--------------|----------|-------------------------------------------------------|
| F1: 100.620 | F2: 1.000 | SW1: 24038 |             | OF1: 10011.3 |          | PTS1d: 32768                                          |
| EX: zgpg30  |           | PW: 9.0 us | PD: 2.0 sec | NA: 1024     | LB: 1.00 | Ints - \$SP40011167-5ae-b-C13-DMSO-20170519-CT54 10.1 |

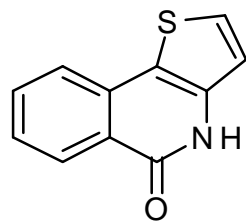

**5af**  
DMSO-D6

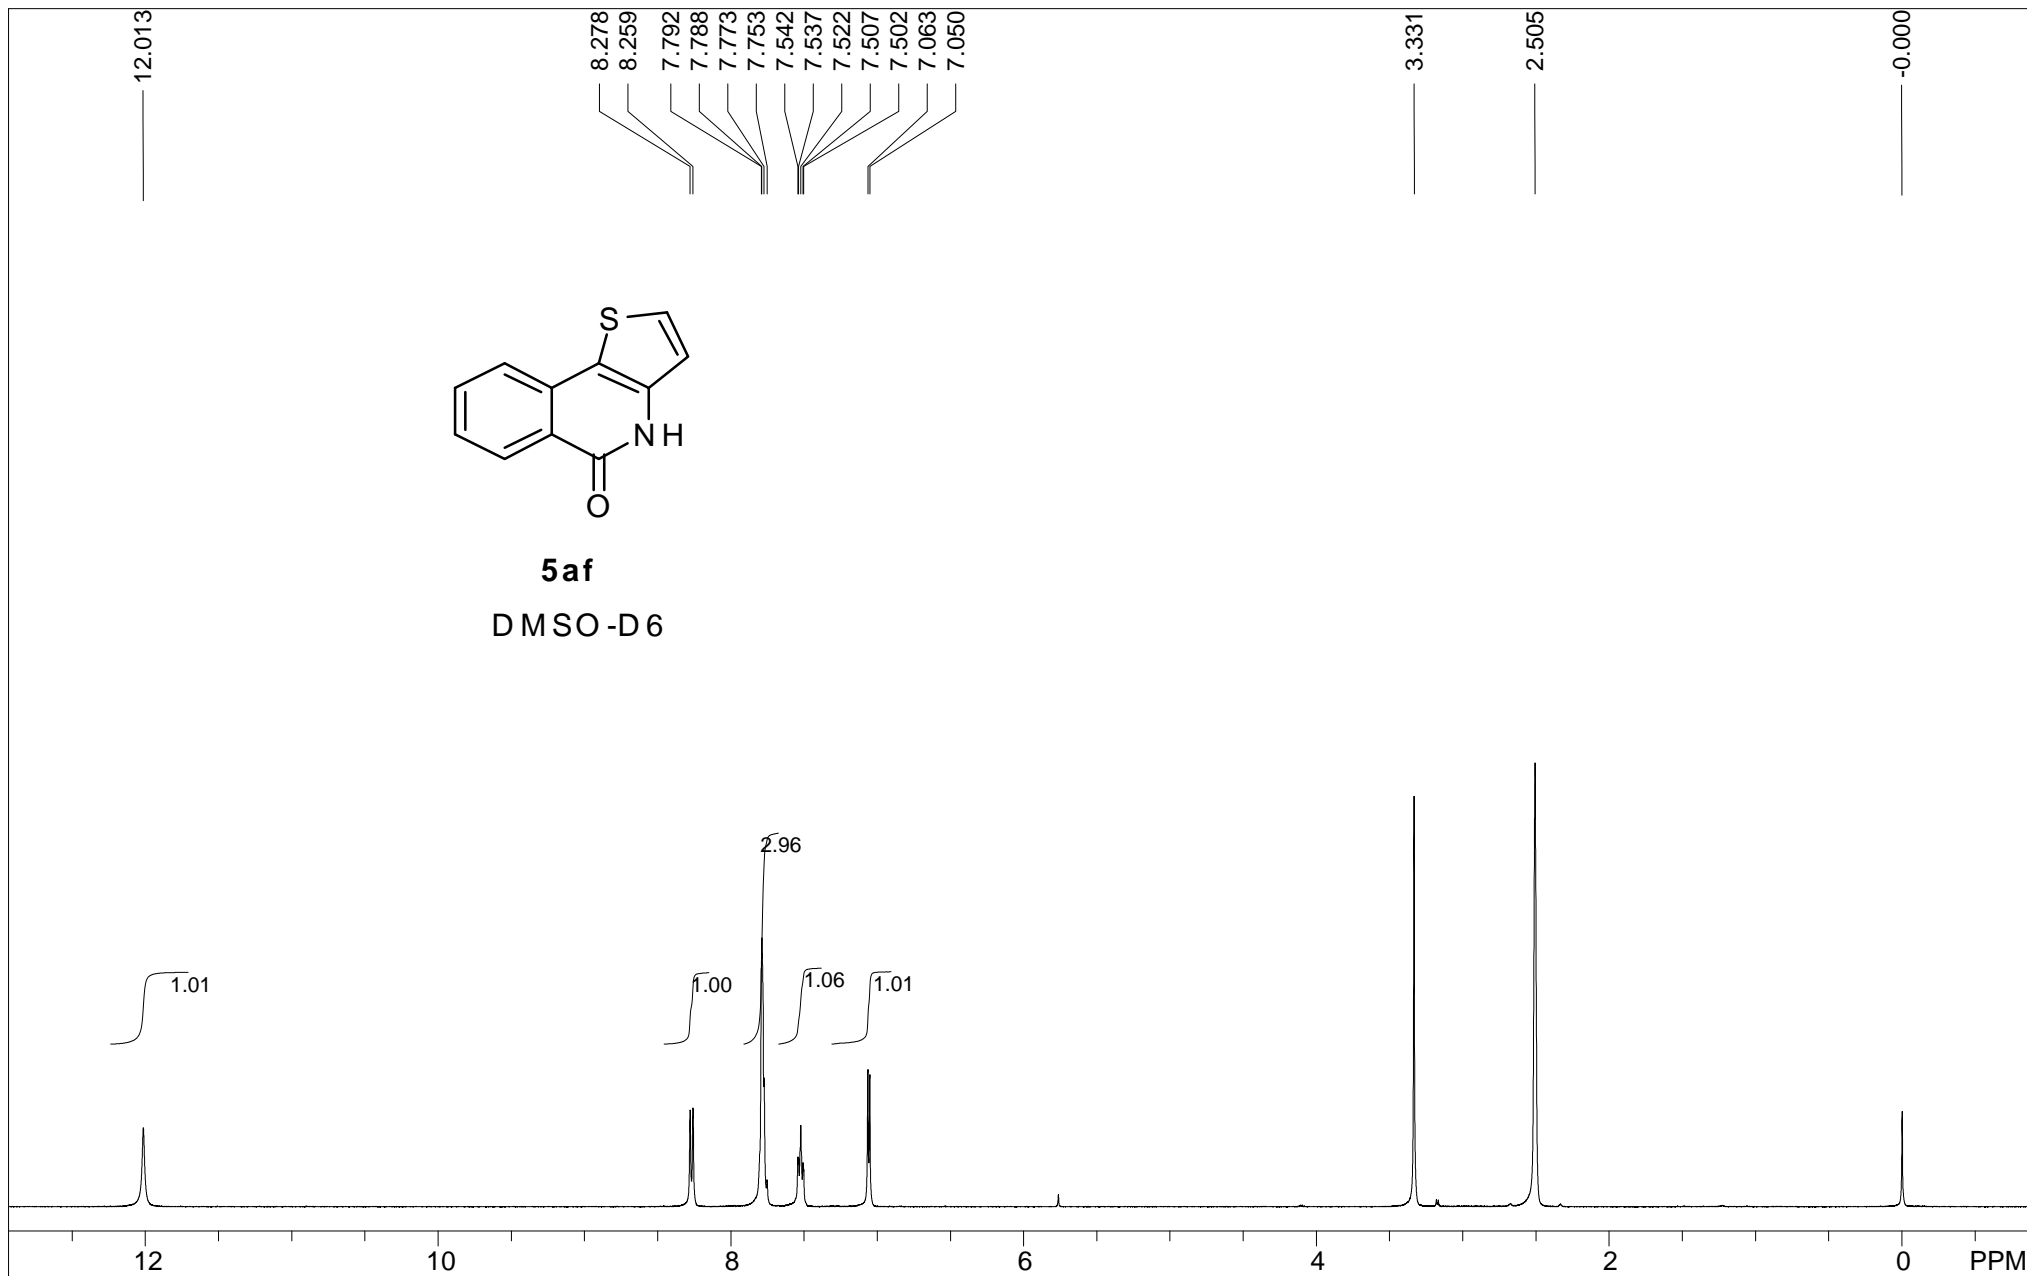

USER: fx -- DATE: 2017-05-25 14:55:44.614

|             |             |             |             |                                                            |
|-------------|-------------|-------------|-------------|------------------------------------------------------------|
| F1: 400.160 | F2: 1.000   | SW1: 8224   | OF1: 3201.0 | PTS1d: 65536                                               |
| EX: zg30    | PW: 12.8 us | PD: 1.0 sec | NA: 16      | LB: 0.3 Nuts - \$sp-0011167-5af-H1-DMSO-20170525-CT54 10.1 |

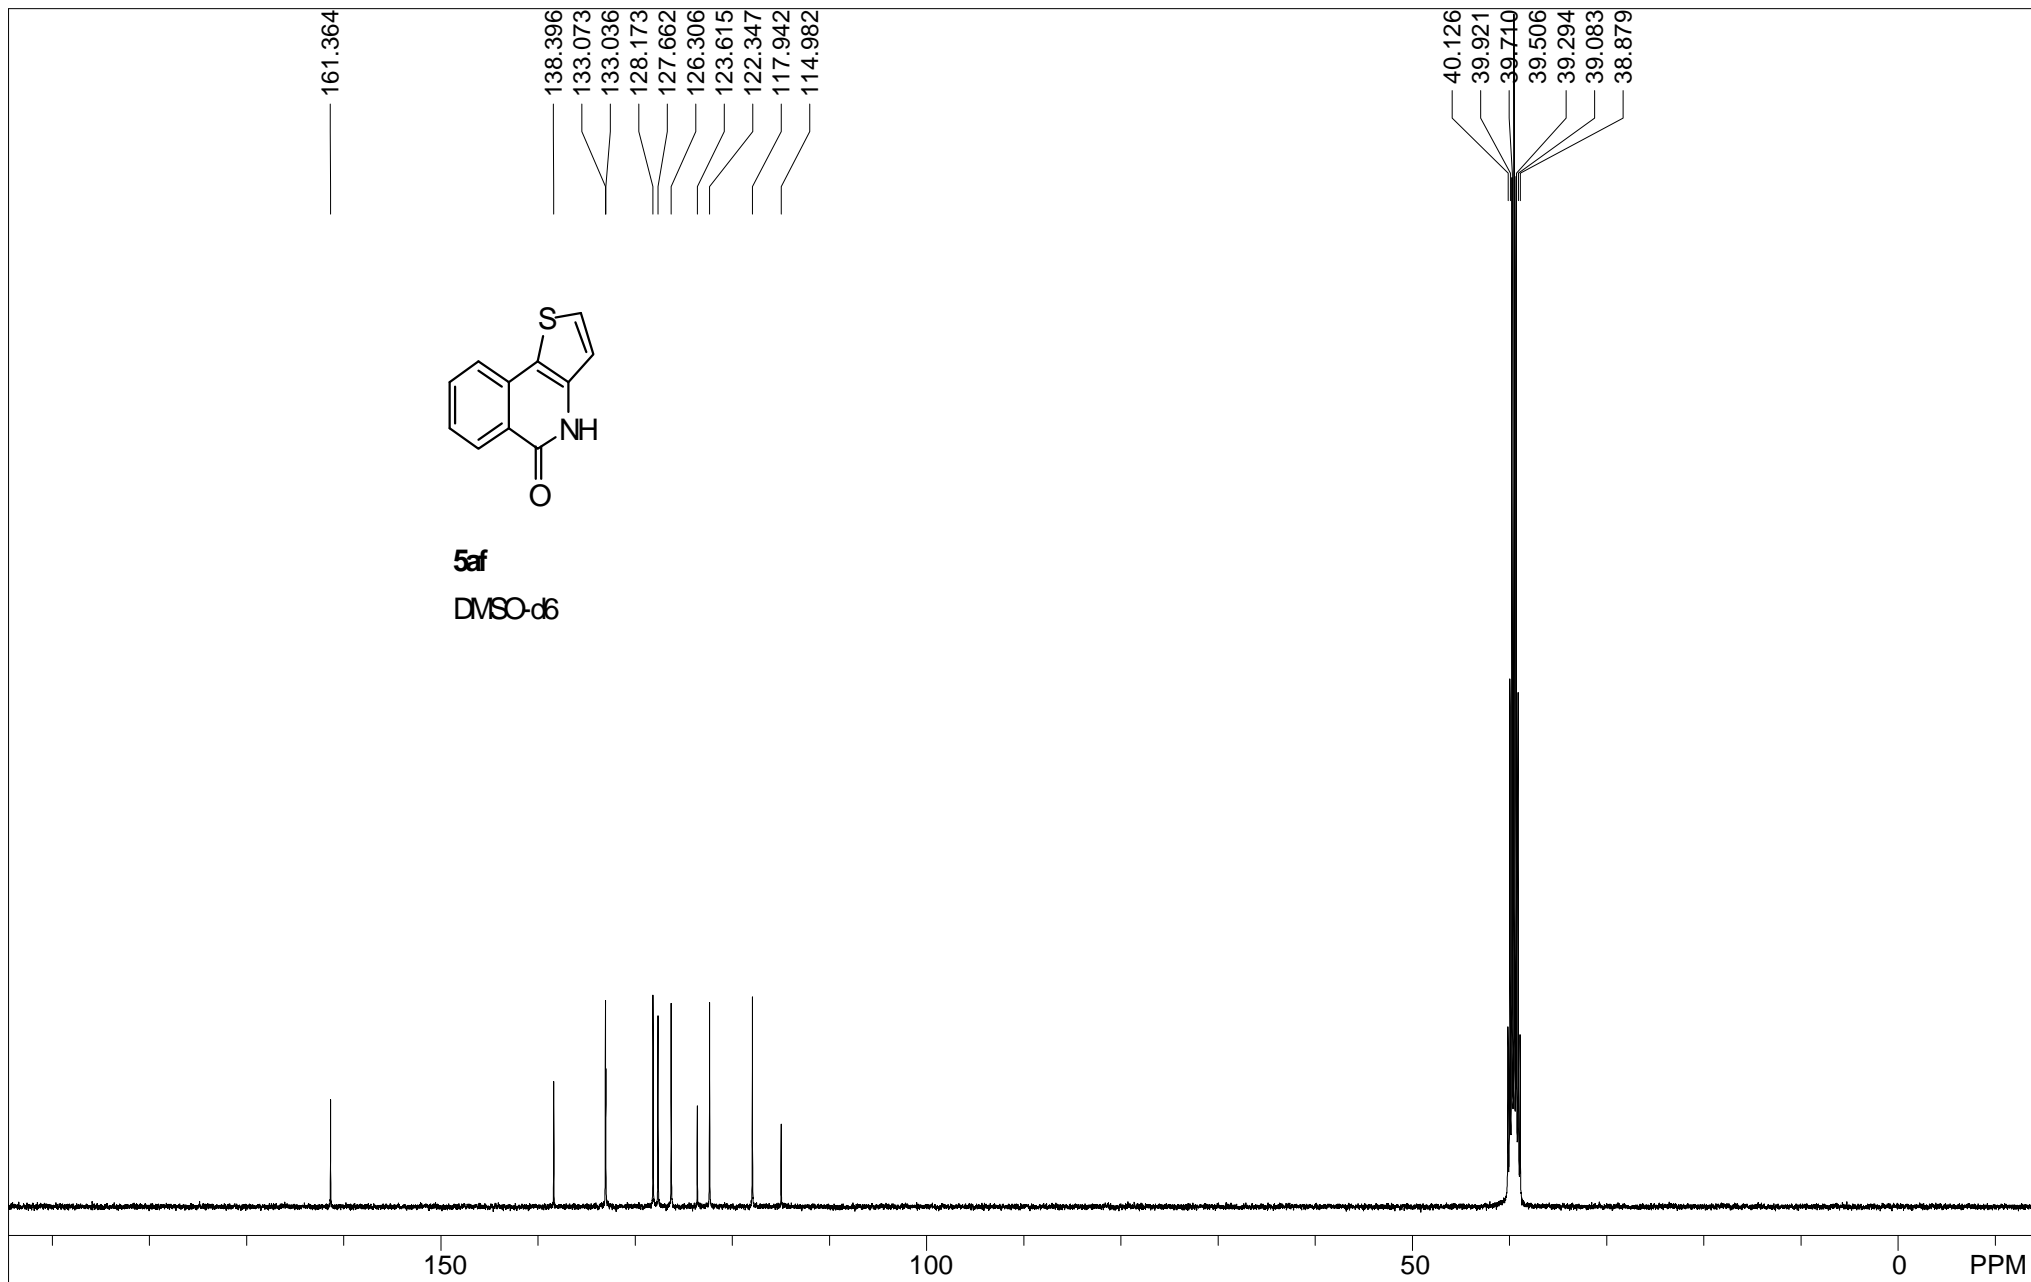

5af

DMSO-d6

USER: fx -- DATE: 2017-06-01 01:31:14.956

|             |            |             |              |                                                              |
|-------------|------------|-------------|--------------|--------------------------------------------------------------|
| F1: 100.620 | F2: 1.000  | SW1: 24038  | OF1: 10011.3 | PTS1d: 32768                                                 |
| EX: zgpg30  | PW: 9.0 us | PD: 2.0 sec | NA: 1024     | LB: 1.0 Nuts - \$\$P-0011167-5af-C13-DMSO-20170531-CT54 10.1 |

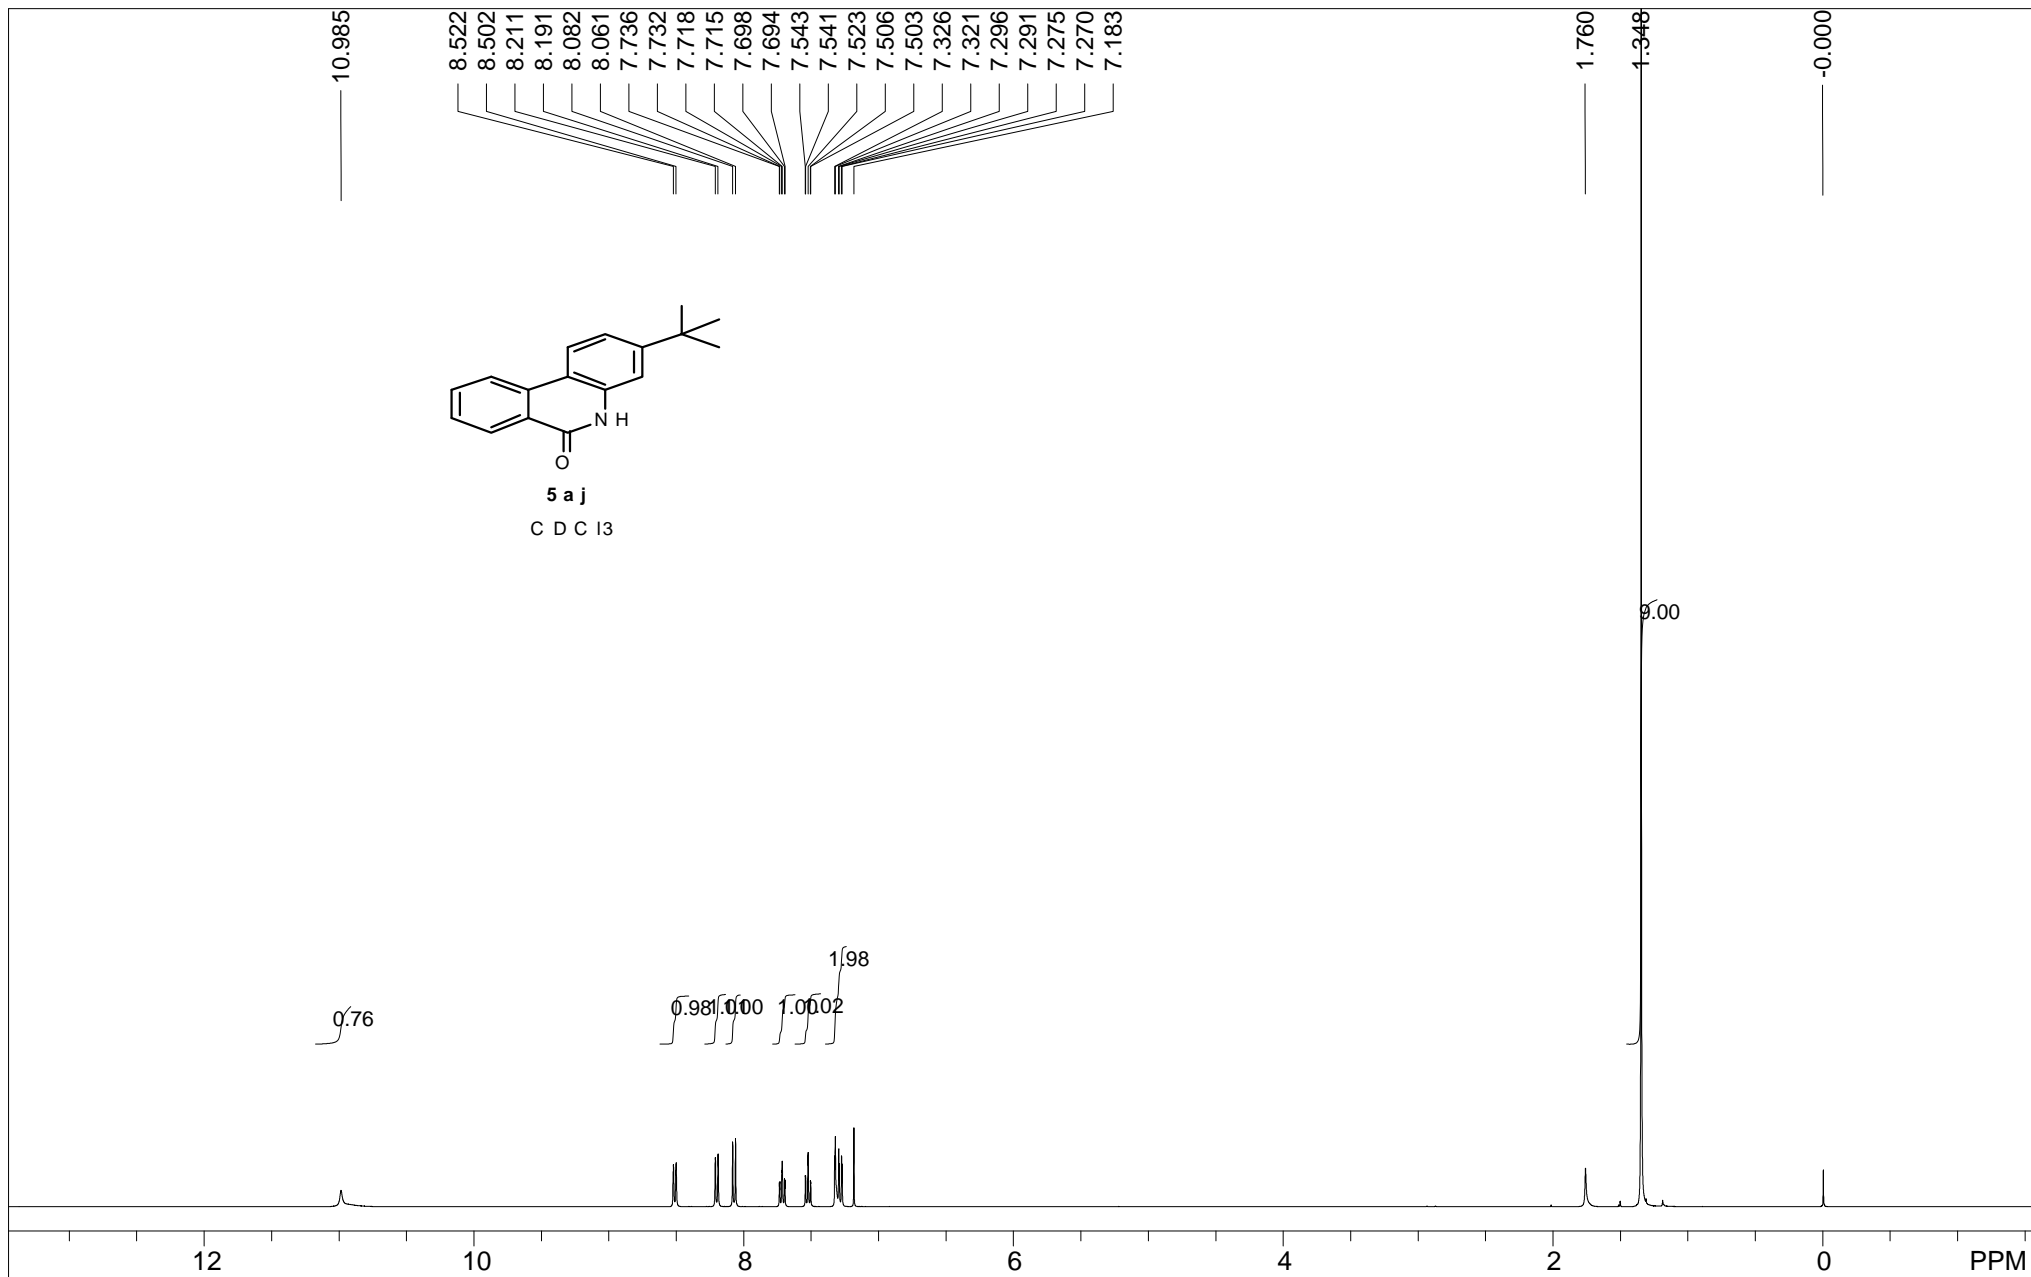

USER: fx -- DATE: 2017-06-20 10:27:13.230

|             |             |             |             |                                                             |
|-------------|-------------|-------------|-------------|-------------------------------------------------------------|
| F1: 400.160 | F2: 1.000   | SW1: 8224   | OF1: 3162.0 | PTS1d: 65536                                                |
| EX: zg30    | PW: 12.8 us | PD: 1.0 sec | NA: 16      | LB: 0.3 Nuts - \$SP-0011167-5AJ-H1-CDC13-20170620-CT54 10.1 |

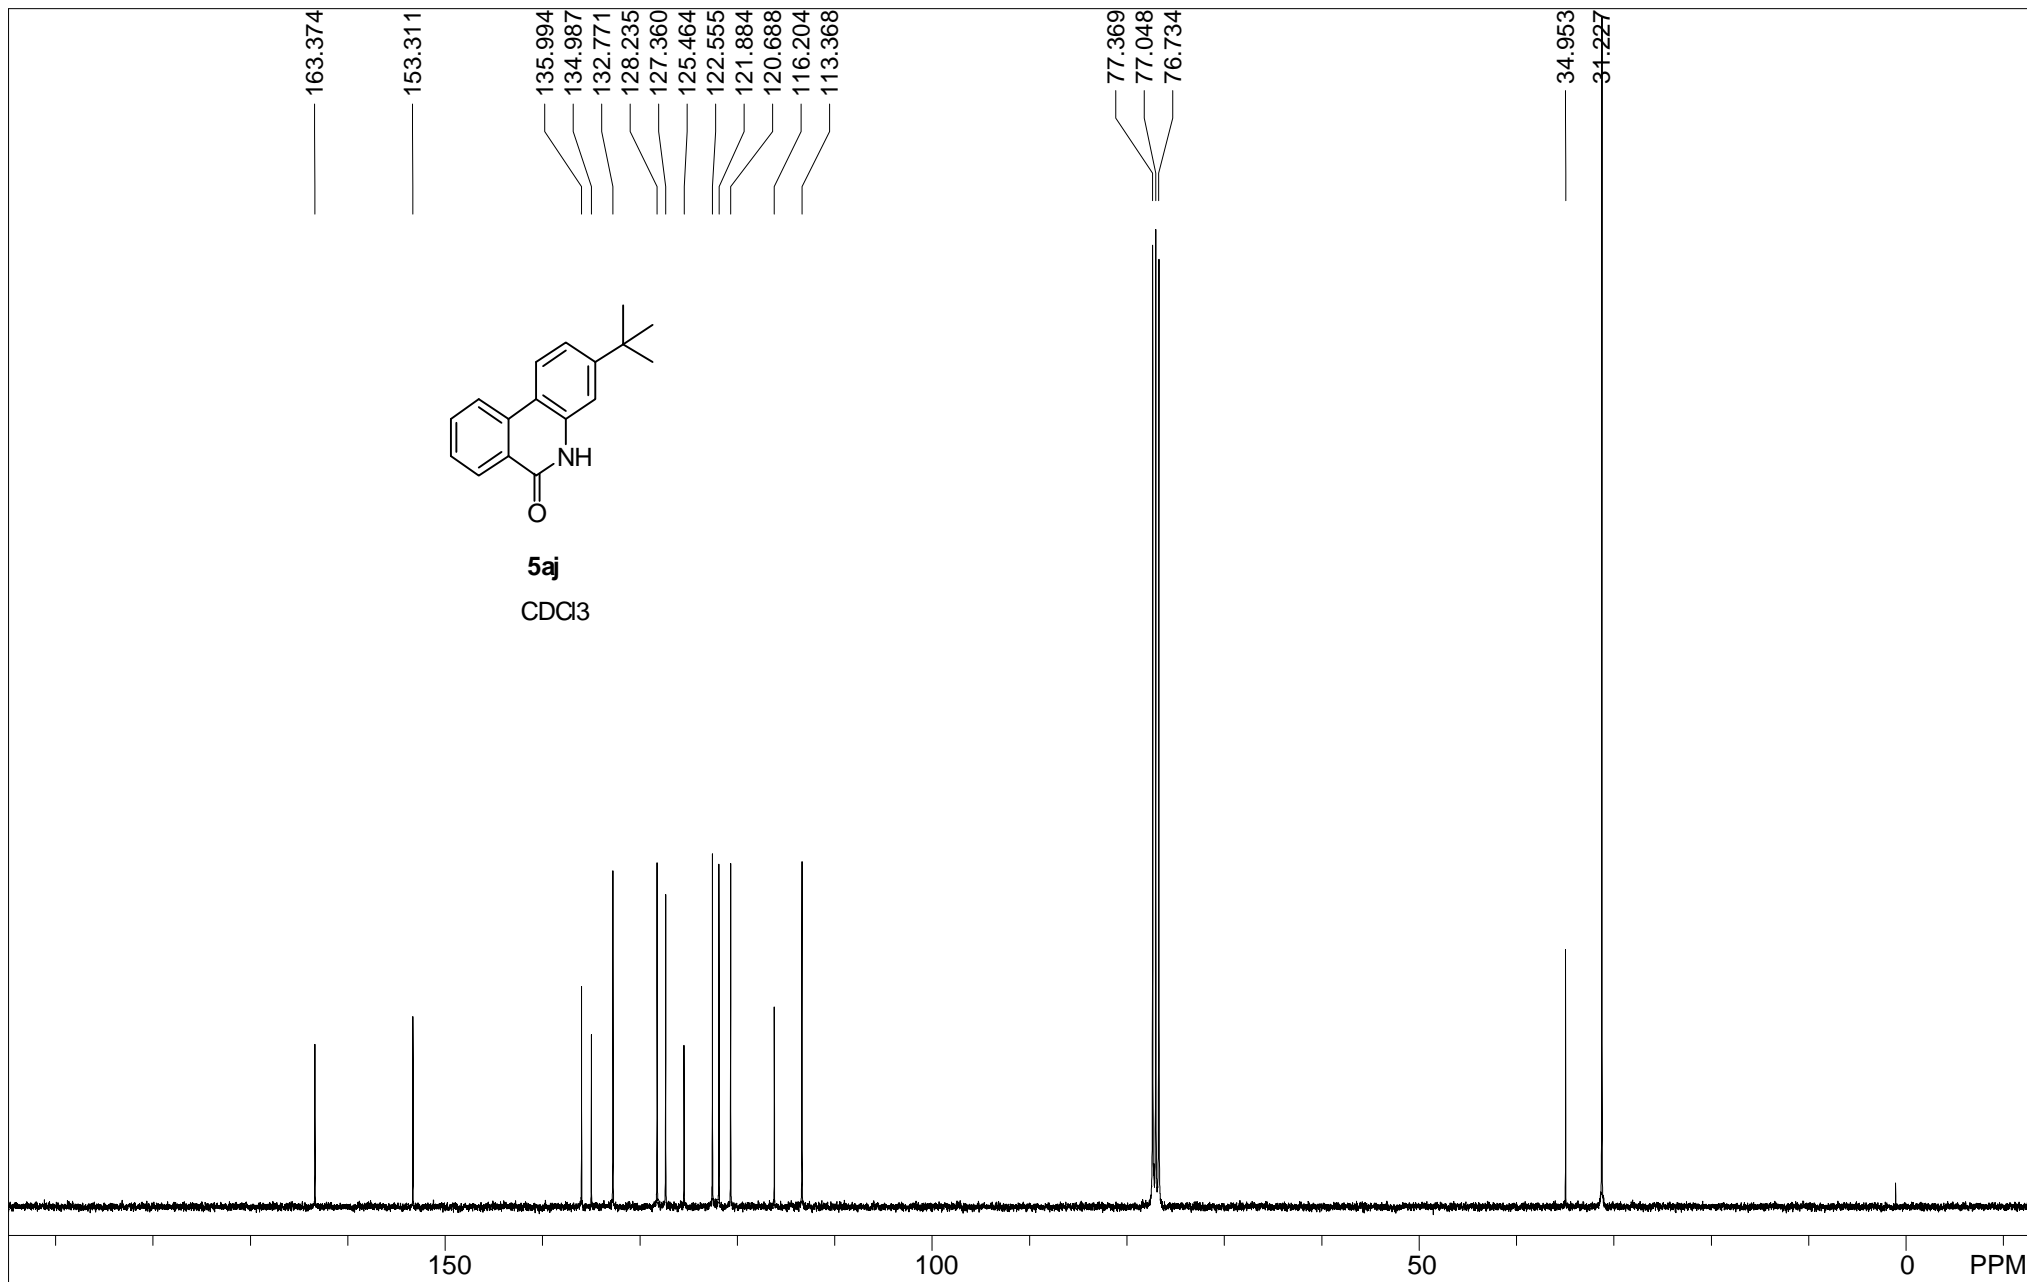

USER: fx -- DATE: 2017-06-20 22:31:44.839

|             |            |             |              |                                                              |
|-------------|------------|-------------|--------------|--------------------------------------------------------------|
| F1: 100.620 | F2: 1.000  | SW1: 24038  | OF1: 10061.6 | PTS1d: 32768                                                 |
| EX: zgpg30  | PW: 9.0 us | PD: 2.0 sec | NA: 1024     | LB: 1.0 Nuts - \$SP-0011167-5aj-C13-CDC13-20170620-CT54 20.1 |

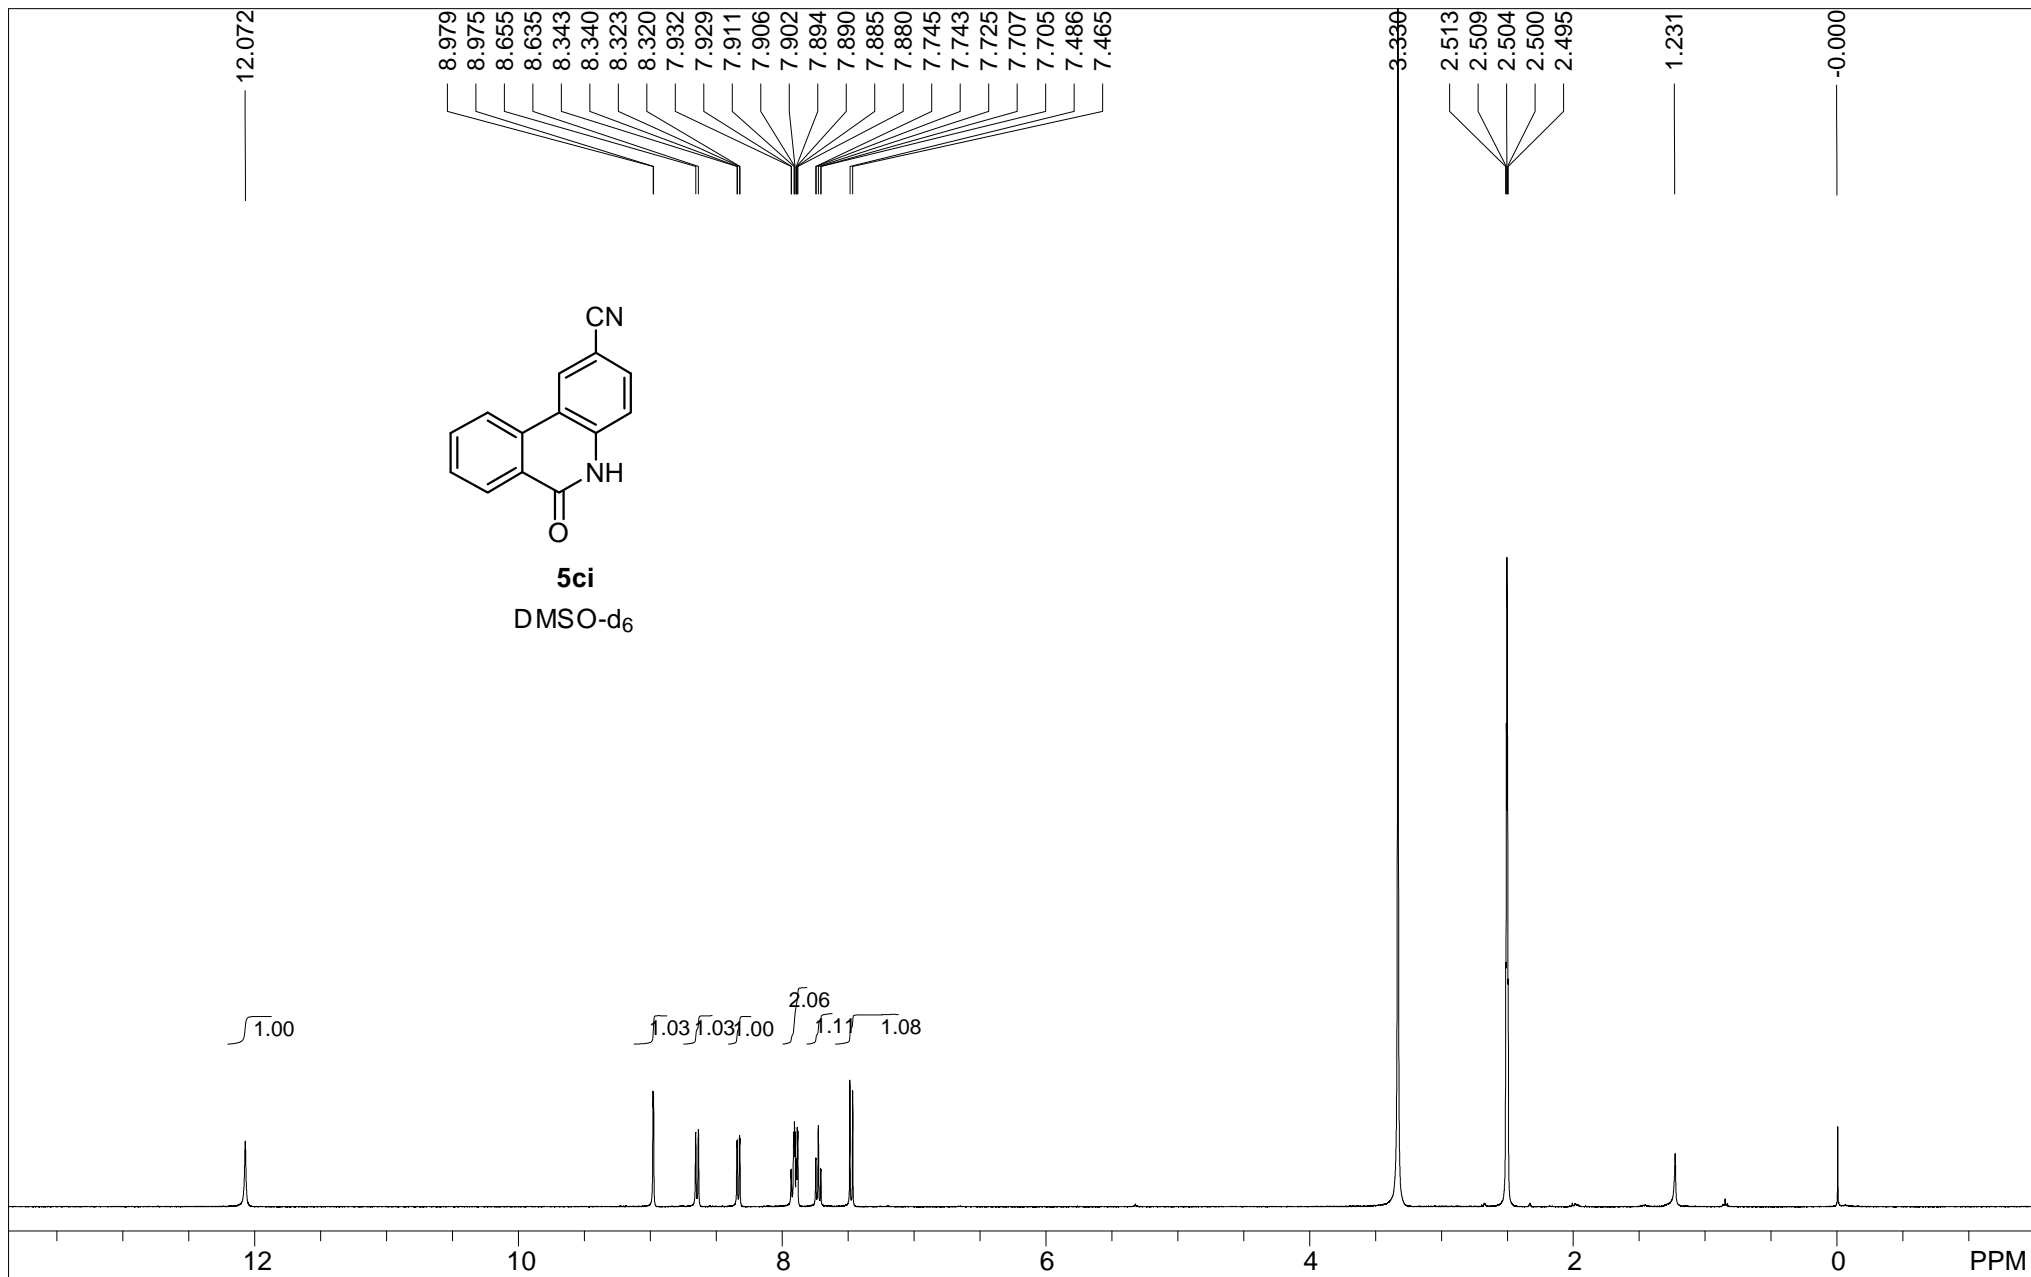

USER: fx -- DATE: 2017-06-15 16:08:12.128

|             |             |             |             |                           |
|-------------|-------------|-------------|-------------|---------------------------|
| F1: 400.160 | F2: 1.000   | SW1: 8224   | OF1: 3199.5 | PTS1d: 65536              |
| EX: zg30    | PW: 12.8 us | PD: 1.0 sec | NA: 16      | LB: 0.3                   |
|             |             |             |             | Nuts - \$5ci-H1-DMSO 10.1 |

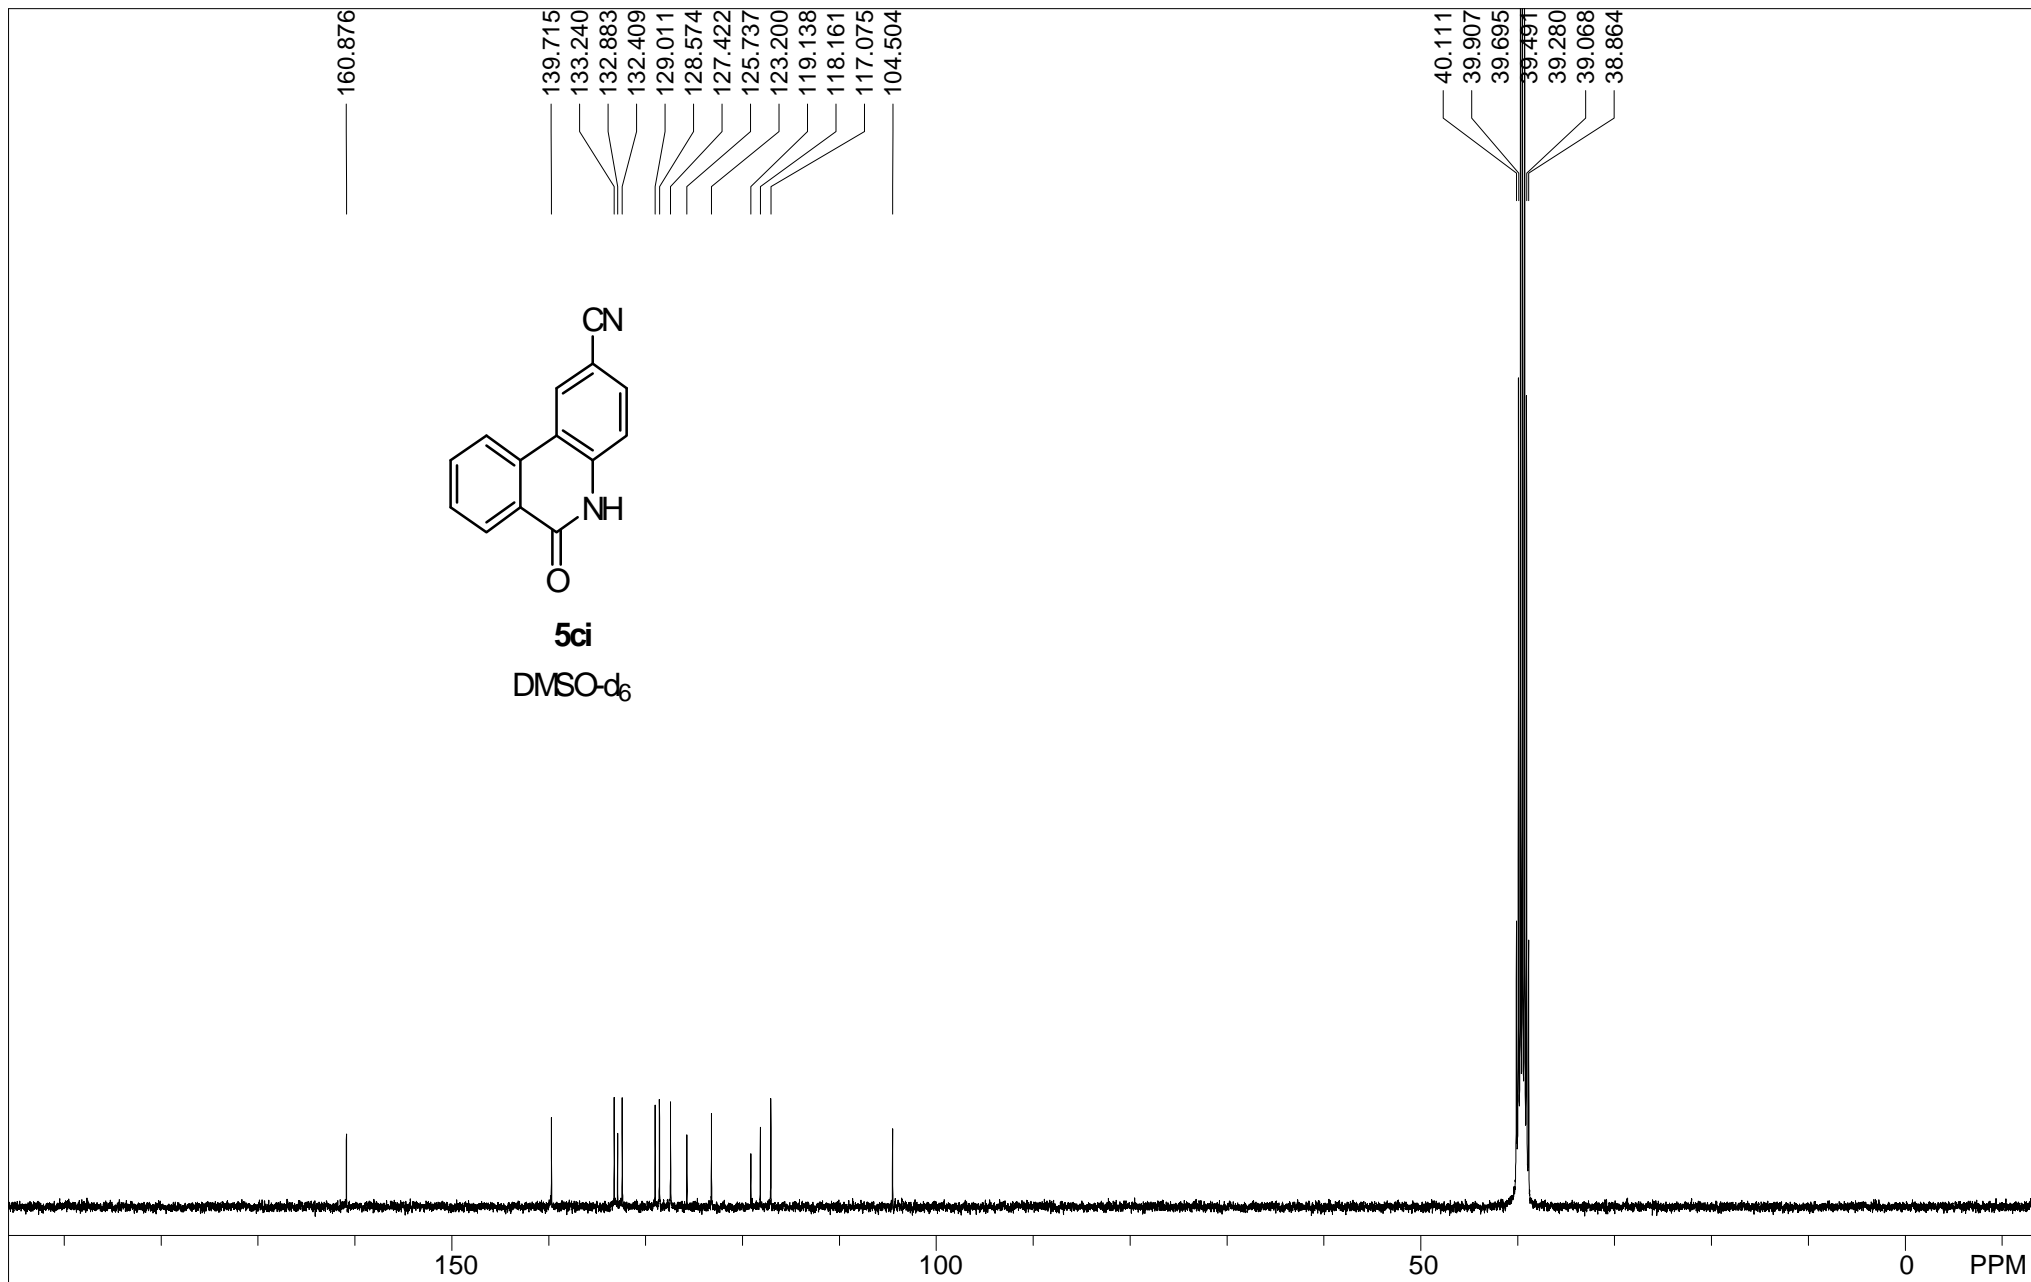

USER: fx -- DATE: 2017-06-16 07:04:24.398

|             |            |             |              |                                                             |
|-------------|------------|-------------|--------------|-------------------------------------------------------------|
| F1: 100.620 | F2: 1.000  | SW1: 24038  | OF1: 10011.3 | PTS1d: 32768                                                |
| EX: zgpg30  | PW: 9.0 us | PD: 2.0 sec | NA: 1024     | LB: 1.0 Nuts - \$SP-0011167-5ci-C13-DMSO-20170615-CT54_20.1 |

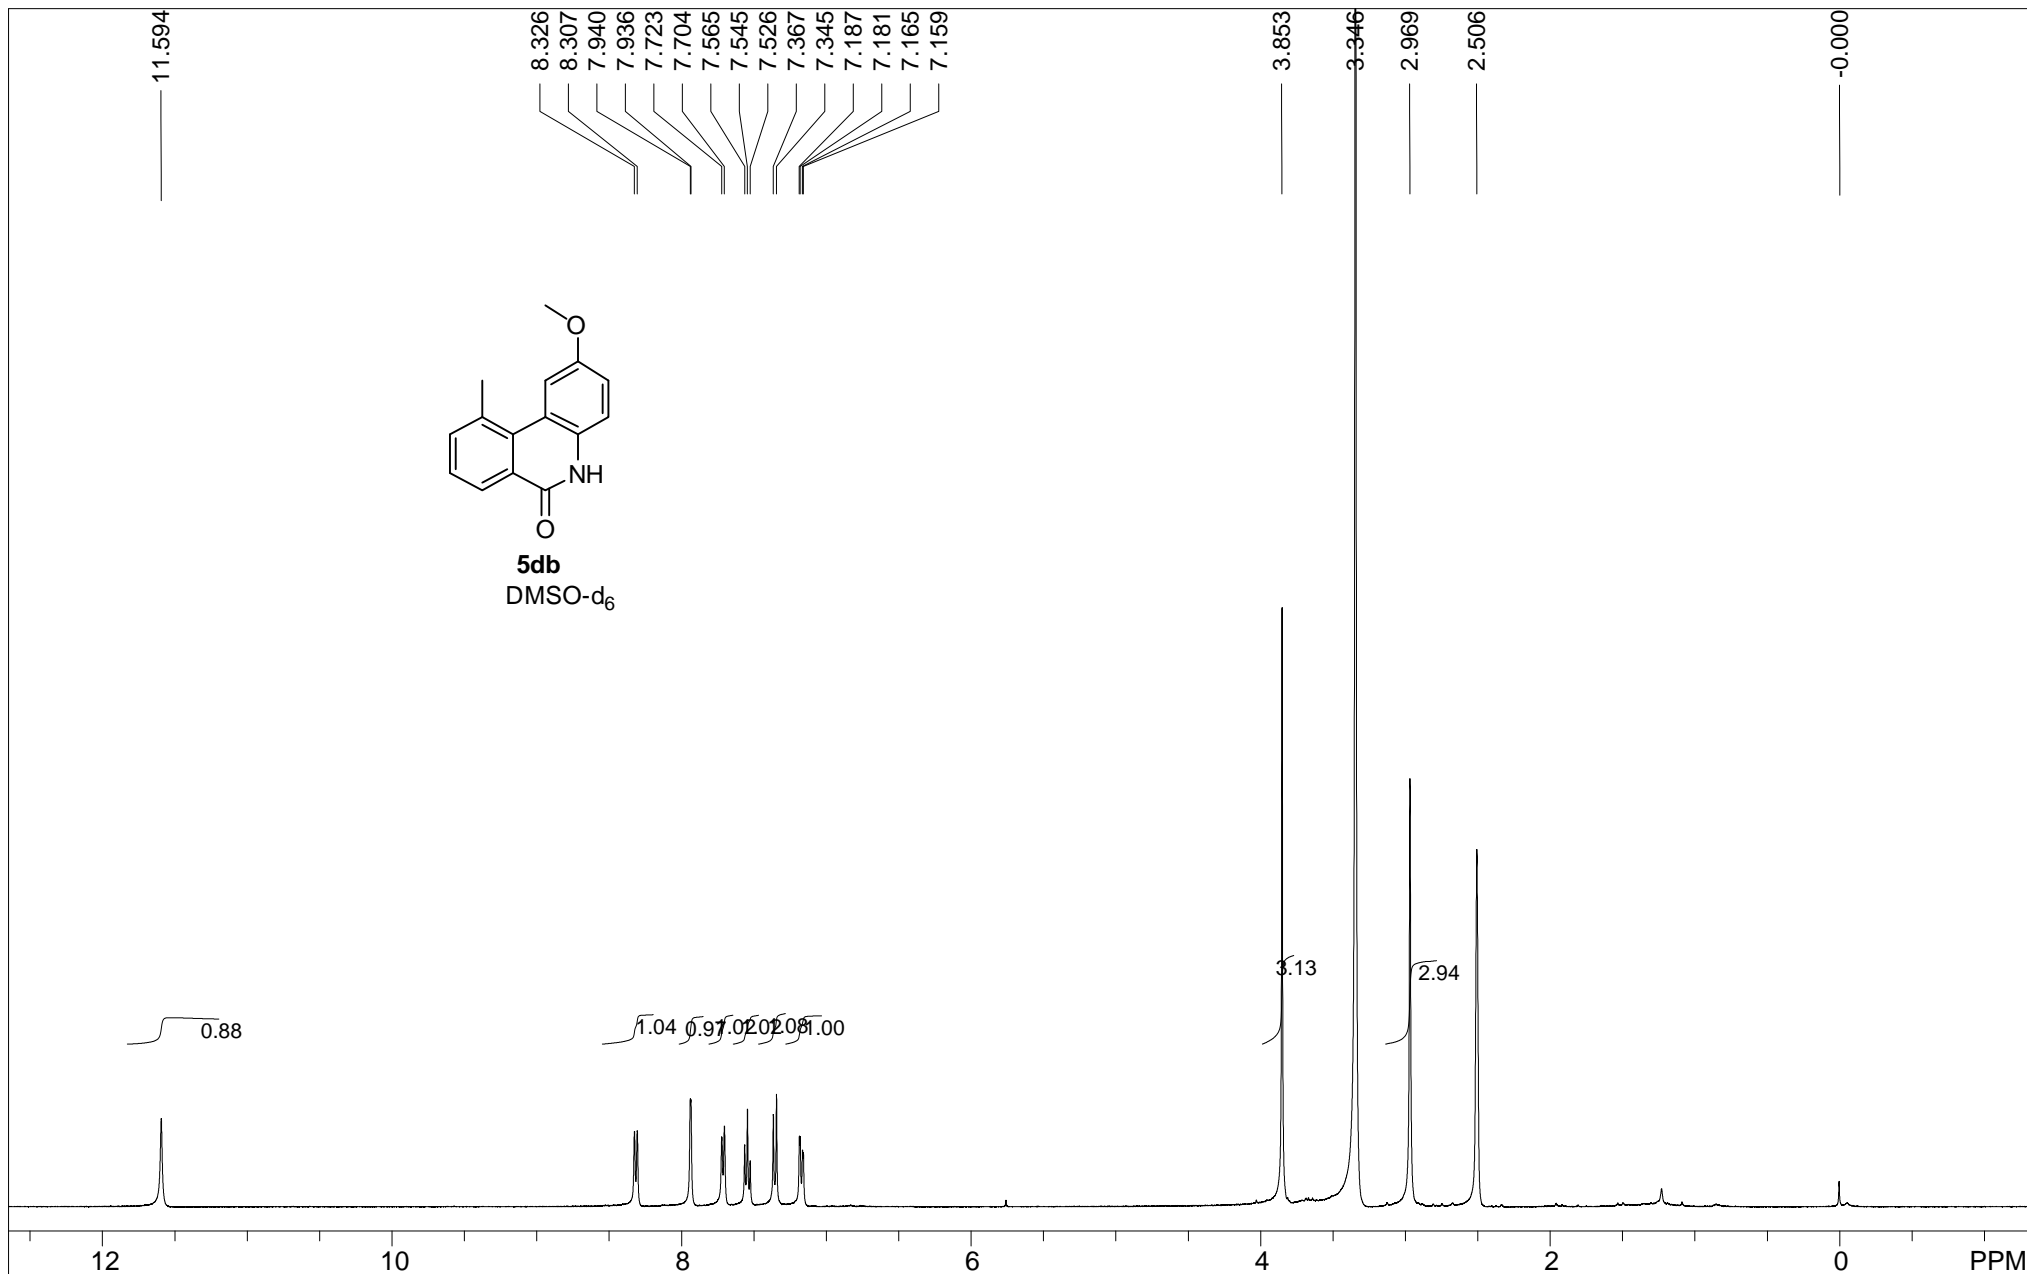

USER: fx -- DATE: 2017-06-05 09:59:19.081

|             |             |             |             |                           |
|-------------|-------------|-------------|-------------|---------------------------|
| F1: 400.160 | F2: 1.000   | SW1: 8224   | OF1: 3199.6 | PTS1d: 65536              |
| EX: zg30    | PW: 12.8 us | PD: 1.0 sec | NA: 16      | LB: 0.3                   |
|             |             |             |             | Nuts - \$5db-H1-DMSO 10.1 |



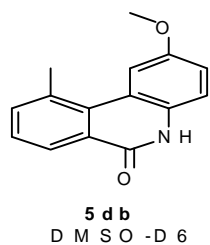

160.438  
153.796  
136.857  
135.122  
133.022  
130.995  
127.538  
127.268  
126.087  
119.423  
117.046  
116.054  
111.307

55.329  
41.285  
41.081  
41.044  
40.089  
39.878  
39.674  
39.462  
39.251  
39.046  
38.835  
25.404

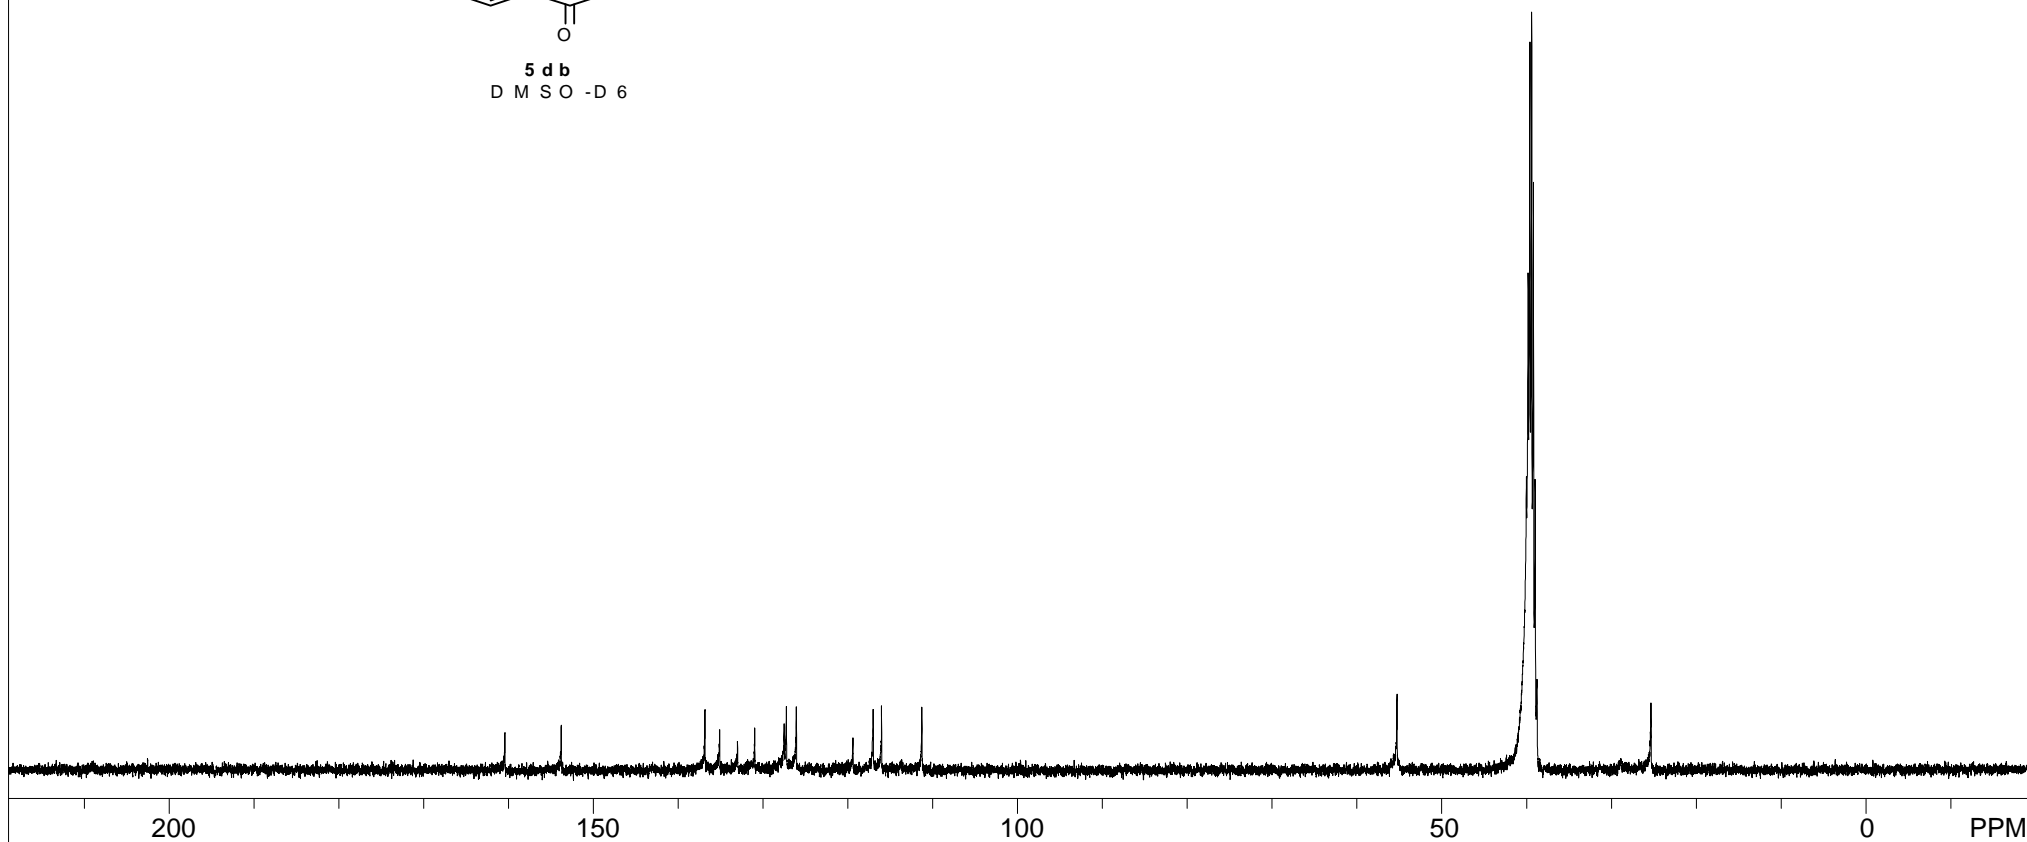

USER: fx -- DATE: 2017-06-06 00:45:41.618

|             |            |             |              |                                                           |
|-------------|------------|-------------|--------------|-----------------------------------------------------------|
| F1: 100.620 | F2: 1.000  | SW1: 24038  | OF1: 10011.3 | PTS1d: 32768                                              |
| EX: zgpg30  | PW: 9.0 us | PD: 2.0 sec | NA: 1024     | LB: 1.0uts - \$SP-0011167-5DB-C13-DMSO-20170605-CT54 10.1 |

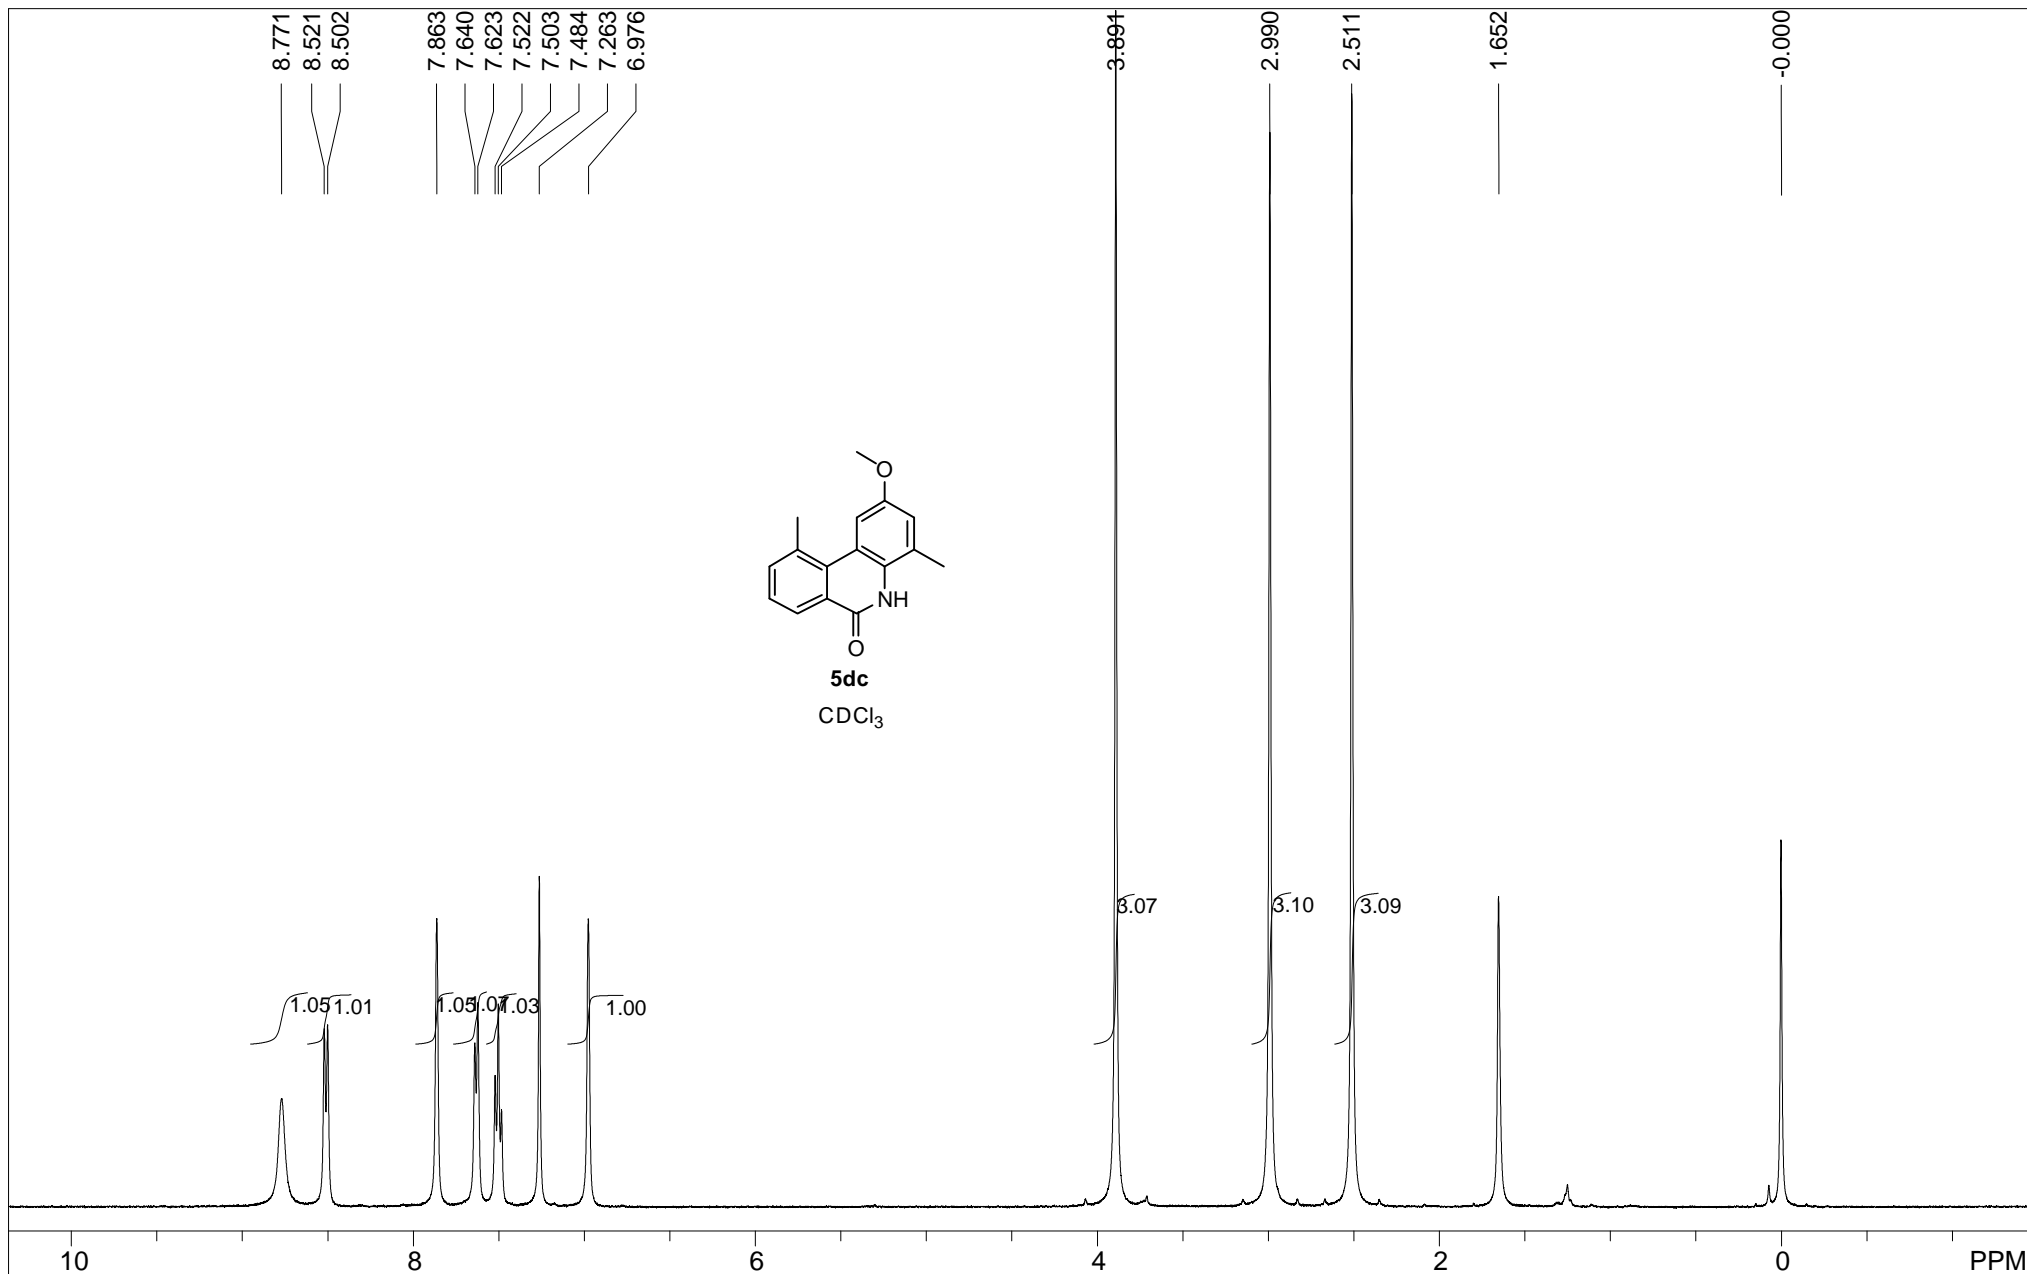

USER: fx -- DATE: 2017-02-10 14:45:14.651

|             |             |             |             |                            |
|-------------|-------------|-------------|-------------|----------------------------|
| F1: 400.160 | F2: 1.000   | SW1: 8224   | OF1: 3194.9 | PTS1d: 65536               |
| EX: zg30    | PW: 12.8 us | PD: 1.0 sec | NA: 16      | LB: 0.3                    |
|             |             |             |             | Nuts - \$5dc-H1-CDCl3 10.1 |

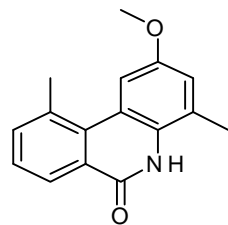

**5dc**  
DMSO-D6

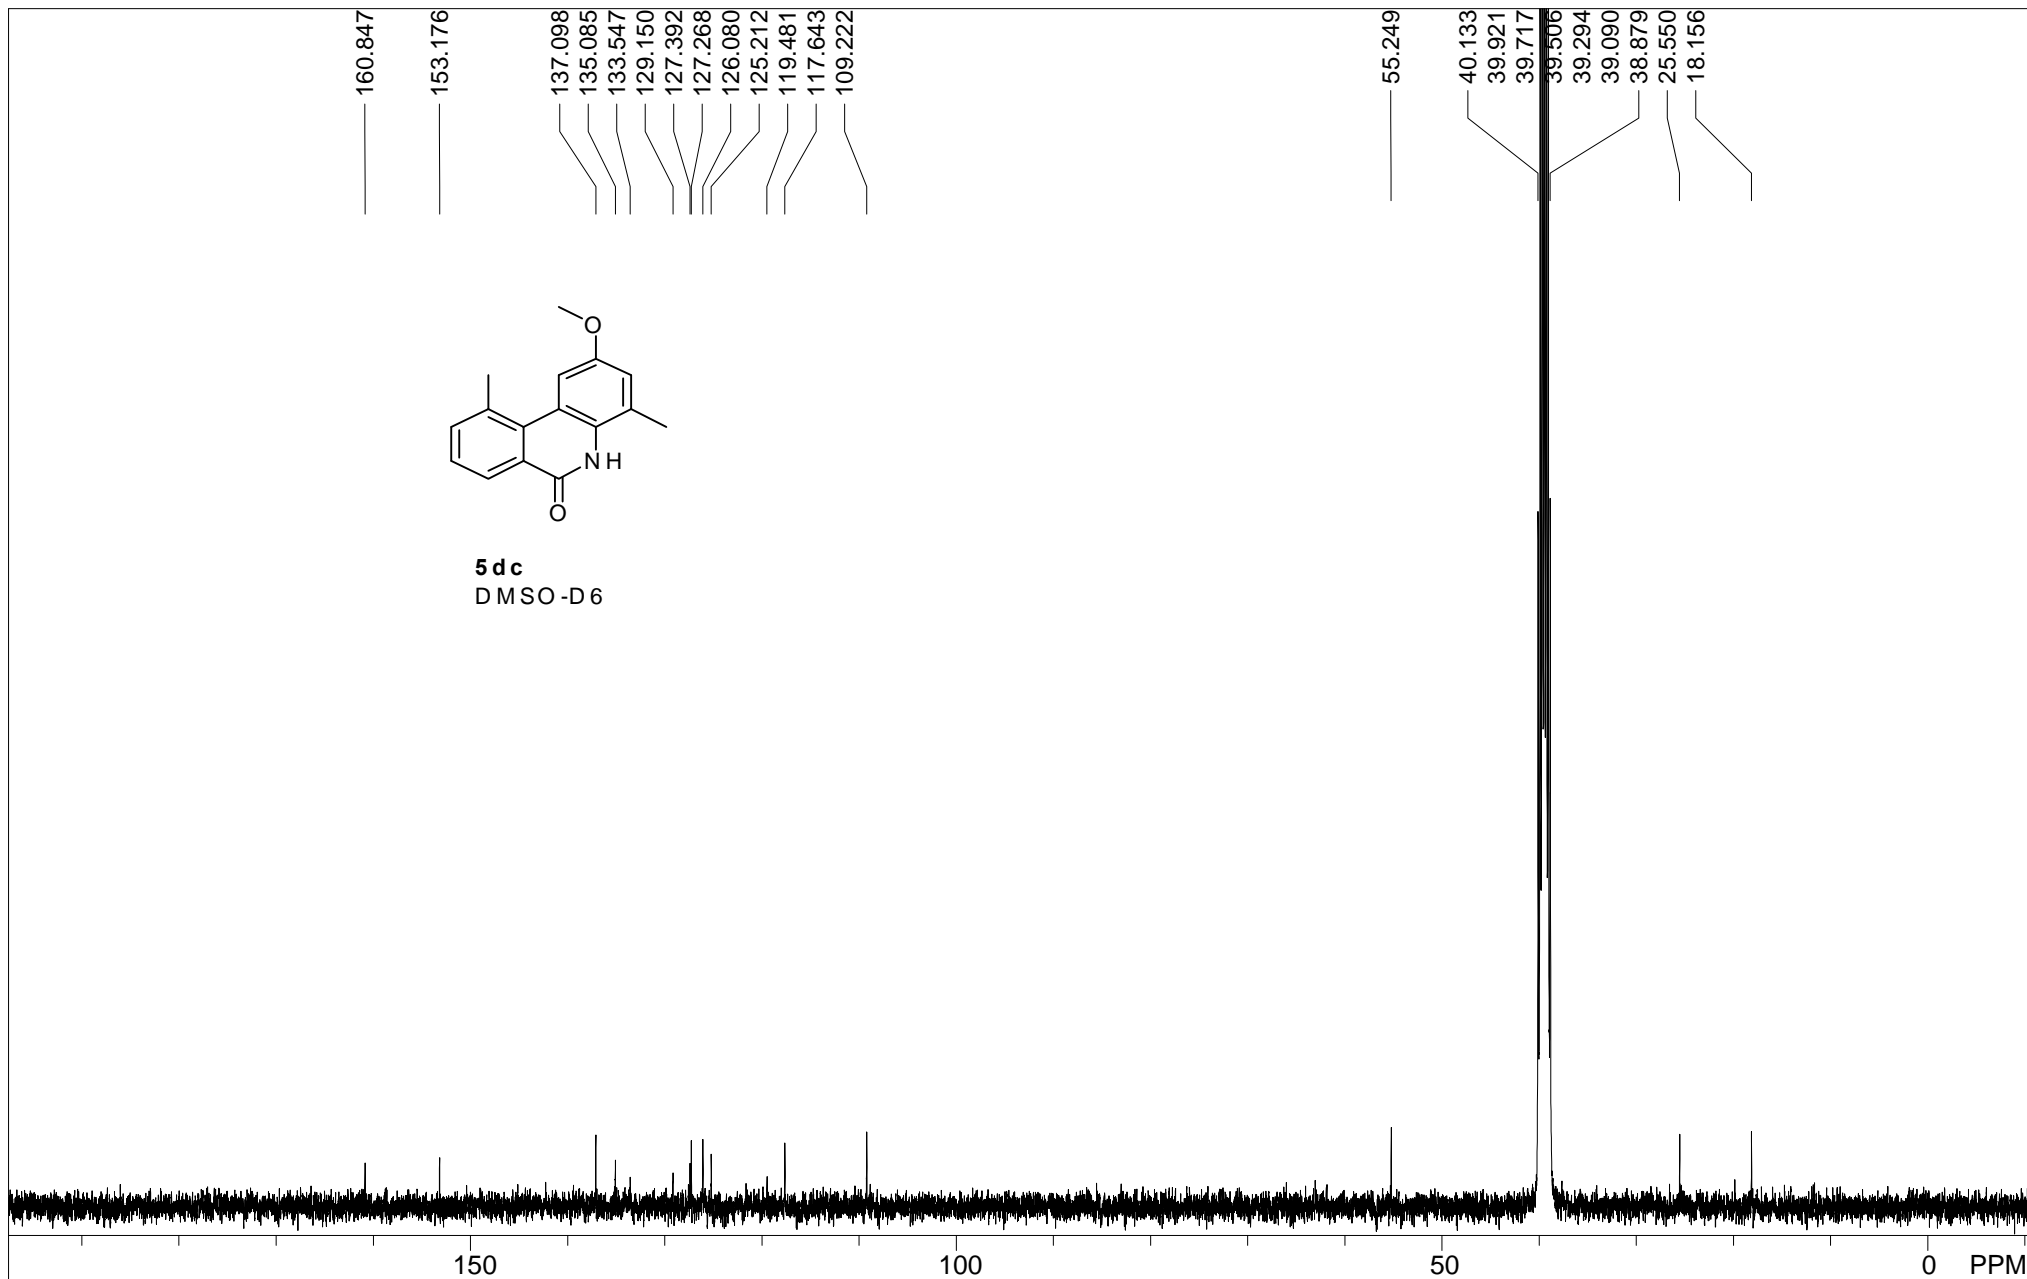

USER: fx -- DATE: 2017-07-14 23:49:22.857

|             |            |             |              |                                                            |
|-------------|------------|-------------|--------------|------------------------------------------------------------|
| F1: 100.620 | F2: 1.000  | SW1: 24038  | OF1: 10011.3 | PTS1d: 32768                                               |
| EX: zgpg30  | PW: 9.0 us | PD: 2.0 sec | NA: 1024     | LB: 1.0 Nuts - \$SP-0011167-M5-C13-DMSO-20170714-CT54 10.1 |

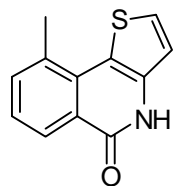

**5df**  
DMSO-d6

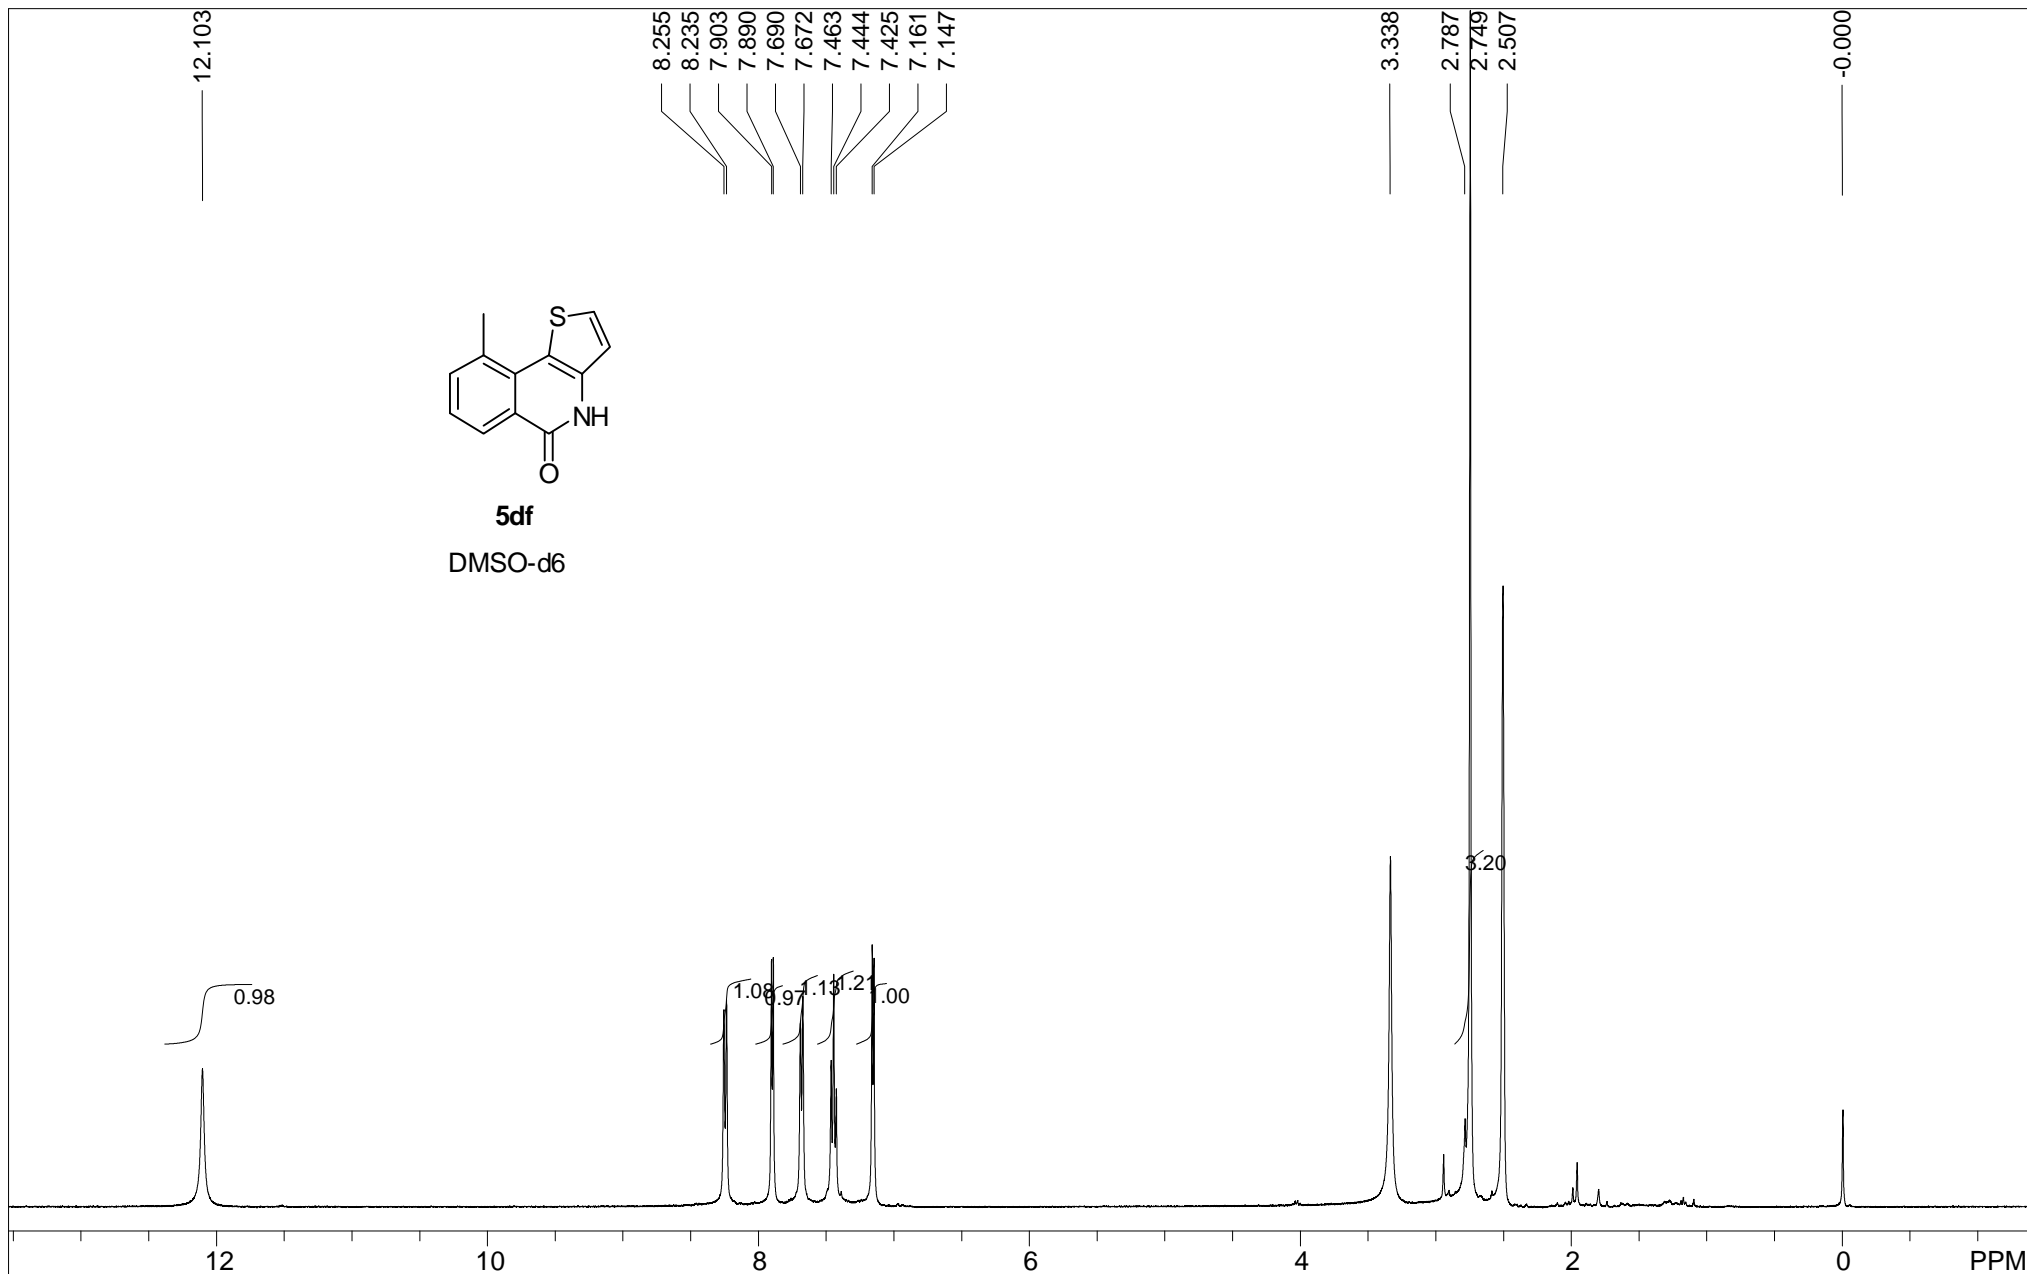

USER: fx -- DATE: 2017-05-09 10:07:39.436

|             |             |             |             |                           |
|-------------|-------------|-------------|-------------|---------------------------|
| F1: 400.160 | F2: 1.000   | SW1: 8224   | OF1: 3200.6 | PTS1d: 65536              |
| EX: zg30    | PW: 12.8 us | PD: 1.0 sec | NA: 16      | LB: 0.3                   |
|             |             |             |             | Nuts - \$5df-H1-DMSO 10.1 |

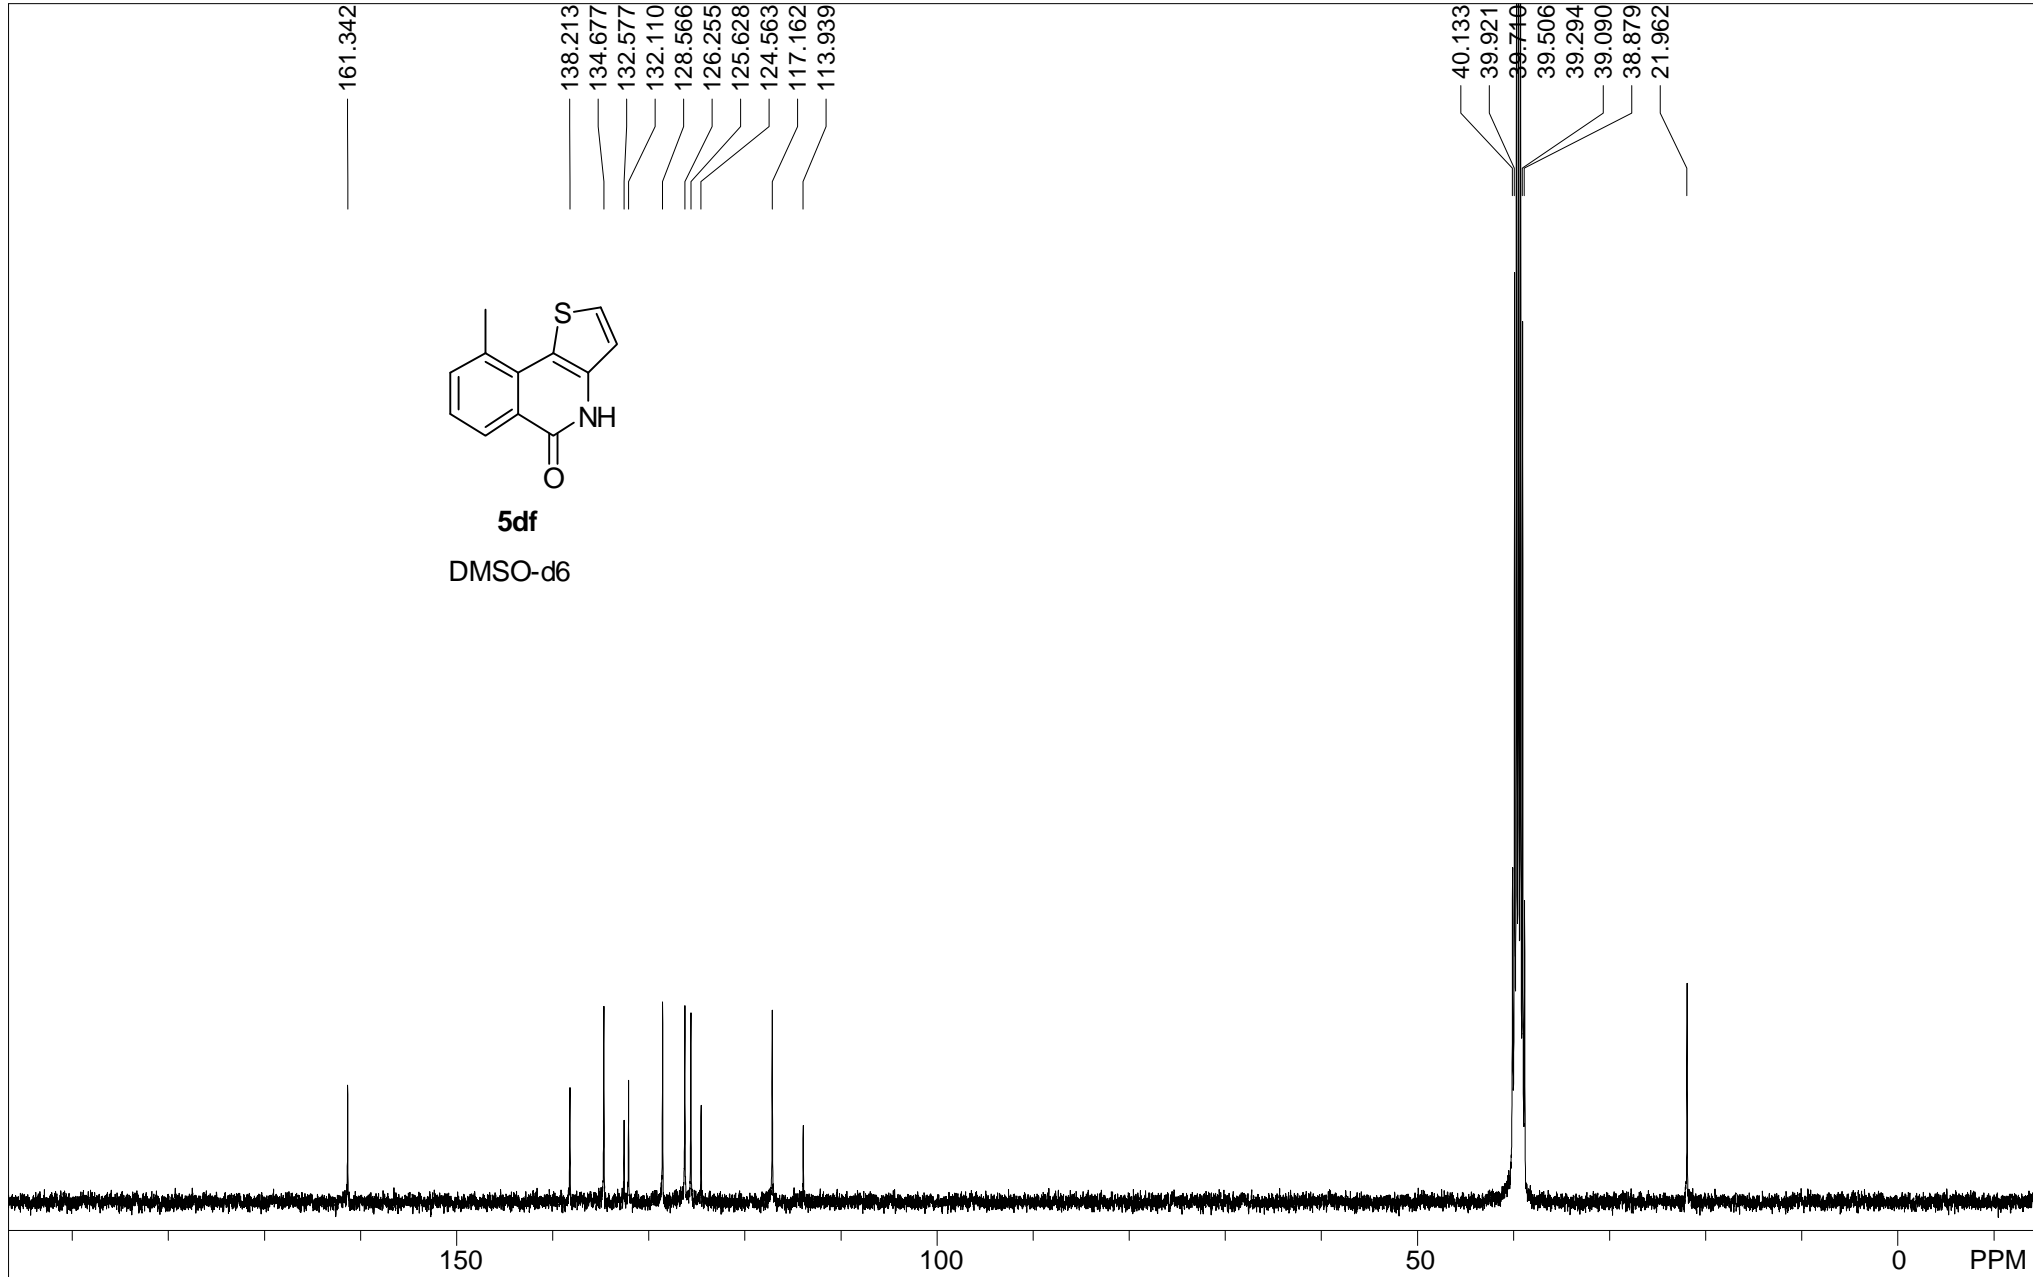

USER: fx -- DATE: 2017-05-10 23:20:25.589

|             |            |             |              |                                                             |
|-------------|------------|-------------|--------------|-------------------------------------------------------------|
| F1: 100.620 | F2: 1.000  | SW1: 24038  | OF1: 10011.3 | PTS1d: 32768                                                |
| EX: zgpg30  | PW: 9.0 us | PD: 2.0 sec | NA: 1024     | LB: 1.0 Nuts - \$SP-0011167-5df-C13-DMSO-20170510-CT54 10.1 |

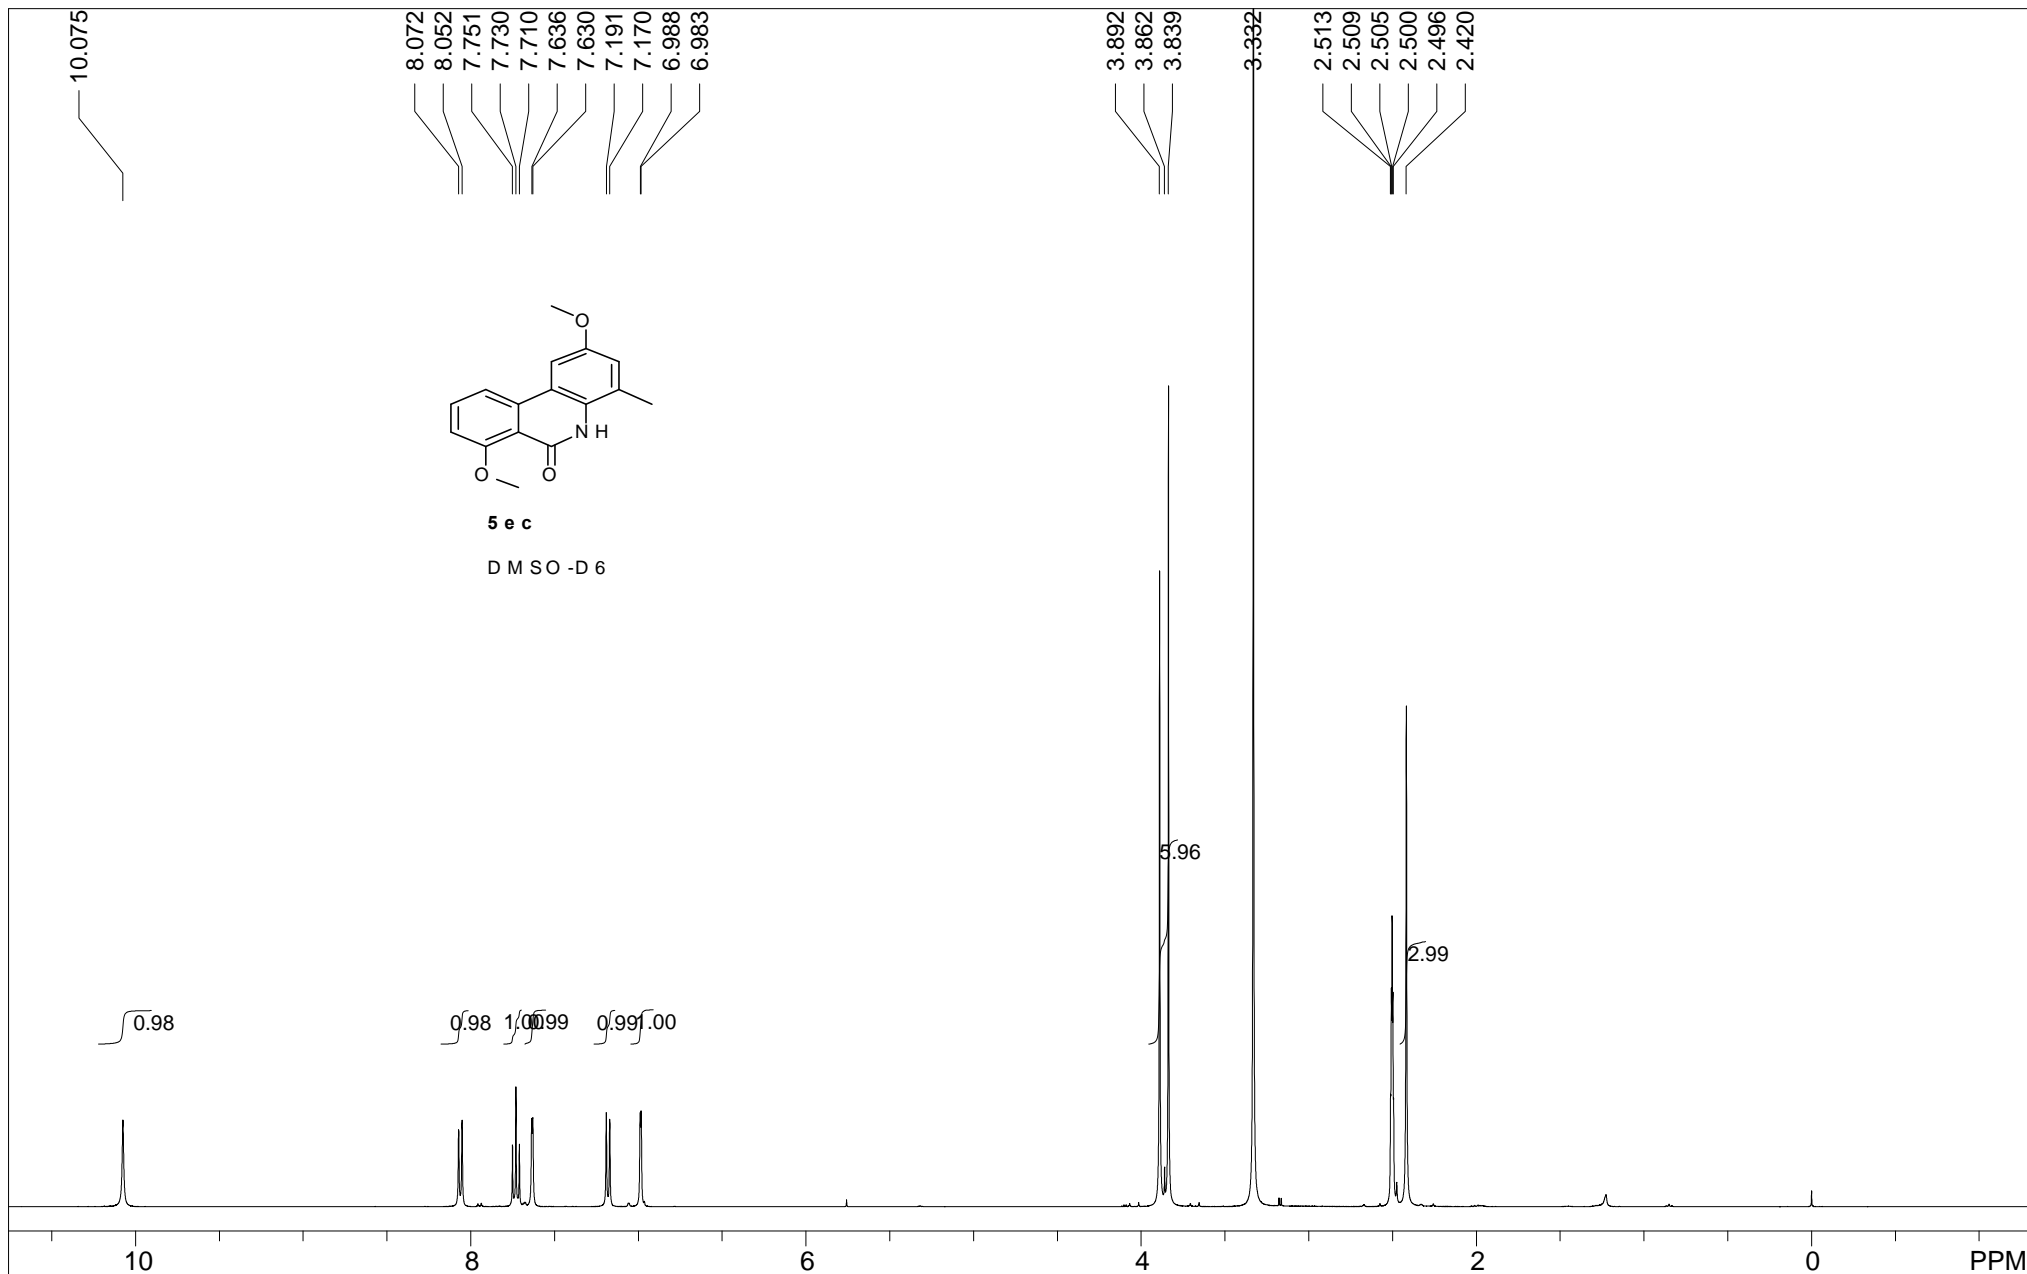

USER: fx -- DATE: 2017-07-13 12:34:56.246

|             |             |             |             |                                                           |
|-------------|-------------|-------------|-------------|-----------------------------------------------------------|
| F1: 400.160 | F2: 1.000   | SW1: 8224   | OF1: 3199.7 | PTS1d: 65536                                              |
| EX: zg30    | PW: 12.8 us | PD: 1.0 sec | NA: 16      | LB: 0.3 Nuts - \$SP-0011167-C5-H1-DMSO-20170713-CT54 10.1 |

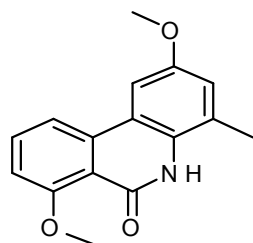

**5ec**  
DMSO-D6

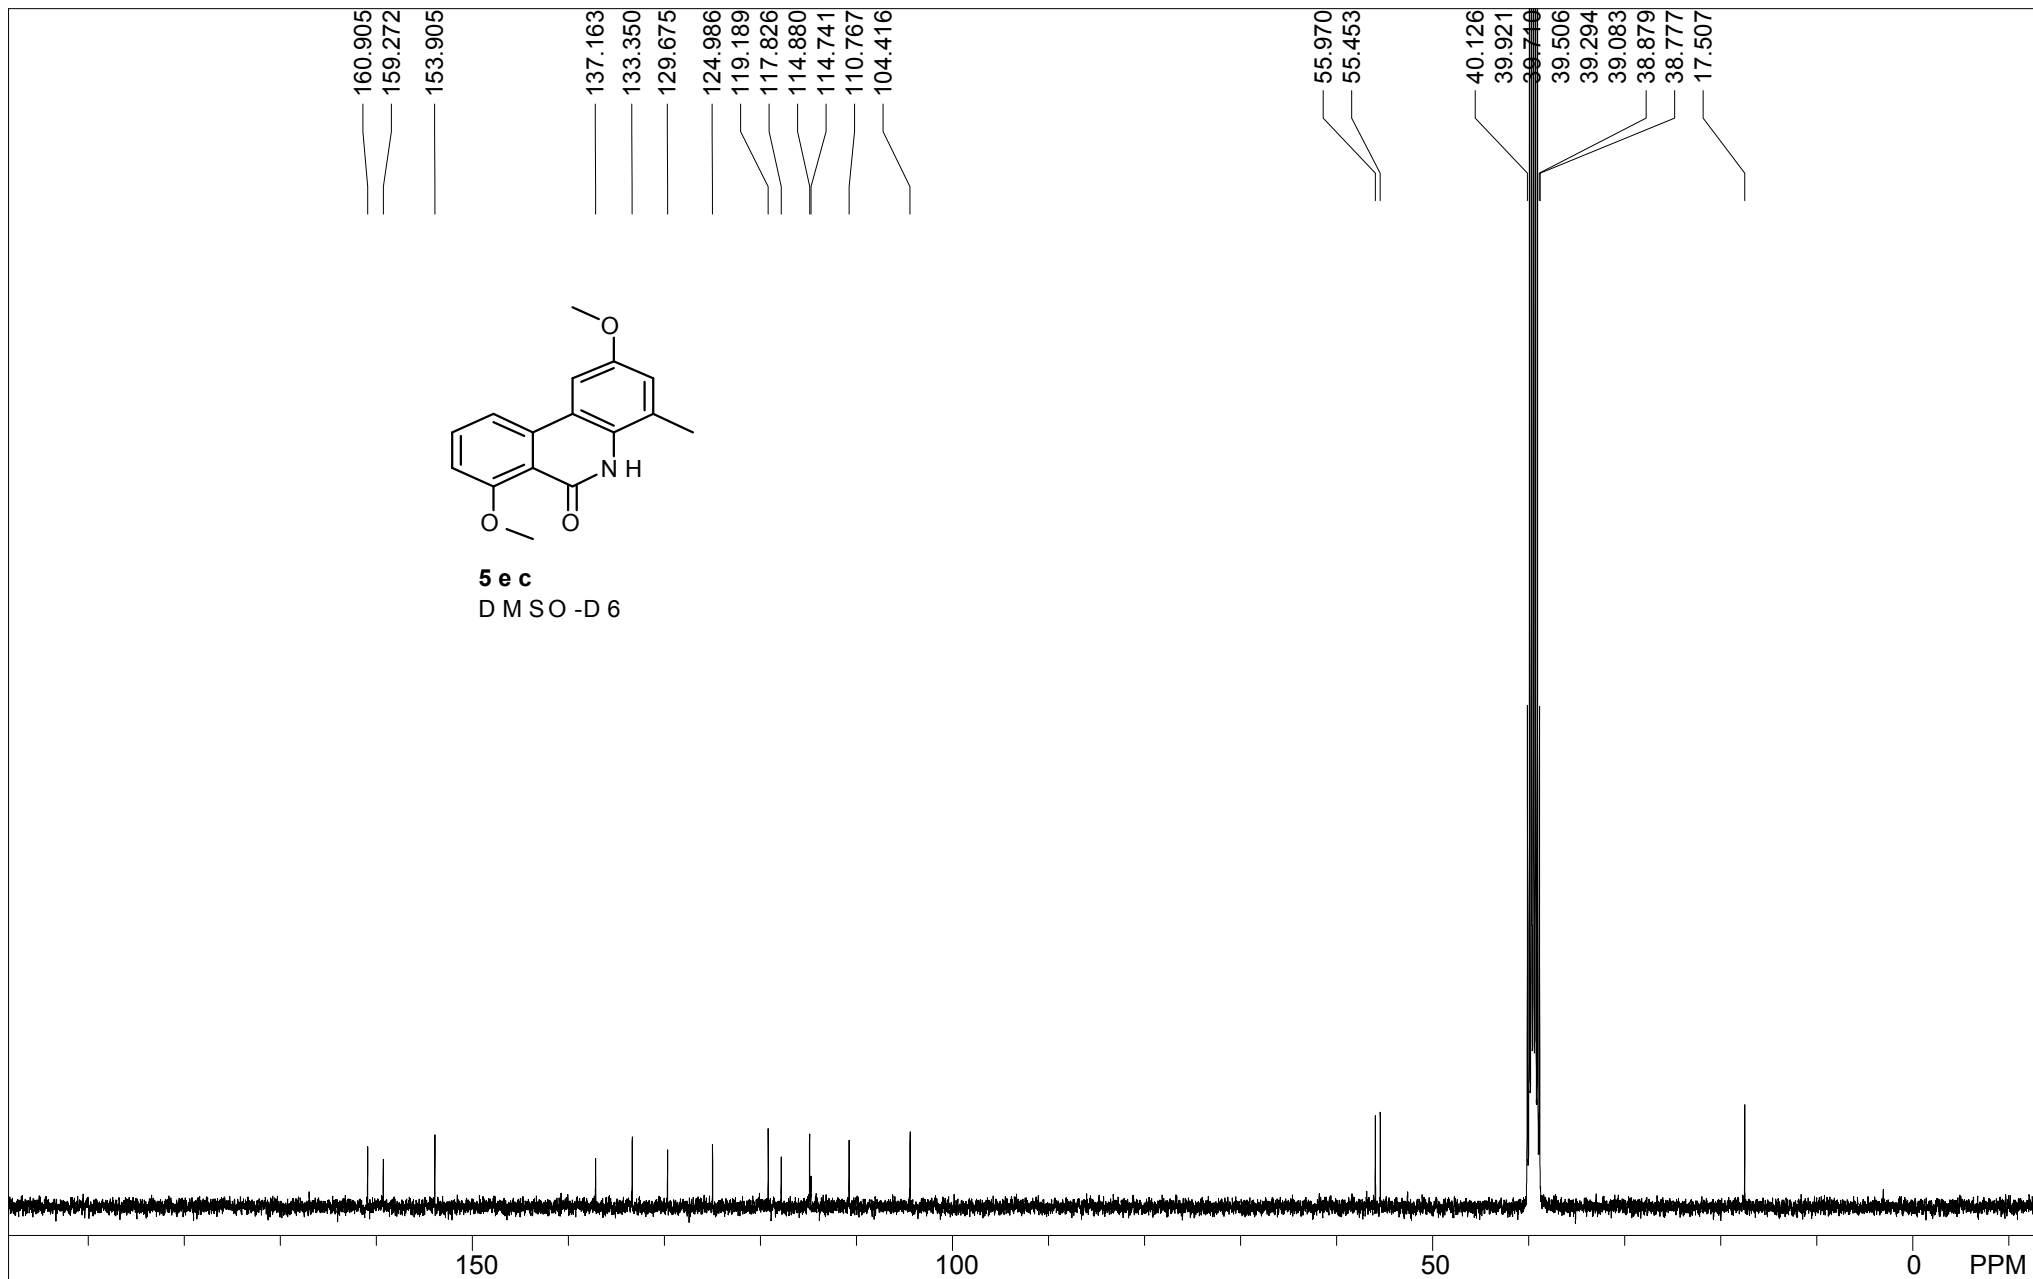

USER: fx -- DATE: 2017-07-15 05:03:14.164

|             |            |             |              |                                                           |
|-------------|------------|-------------|--------------|-----------------------------------------------------------|
| F1: 100.620 | F2: 1.000  | SW1: 24038  | OF1: 10011.3 | PTS1d: 32768                                              |
| EX: zgpg30  | PW: 9.0 us | PD: 2.0 sec | NA: 1024     | LB: 1.0 Nuts - \$SP-0011167-C5-H1-DMSO-20170714-CT54 10.1 |

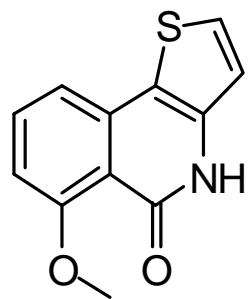

5ef

DMSO-D6

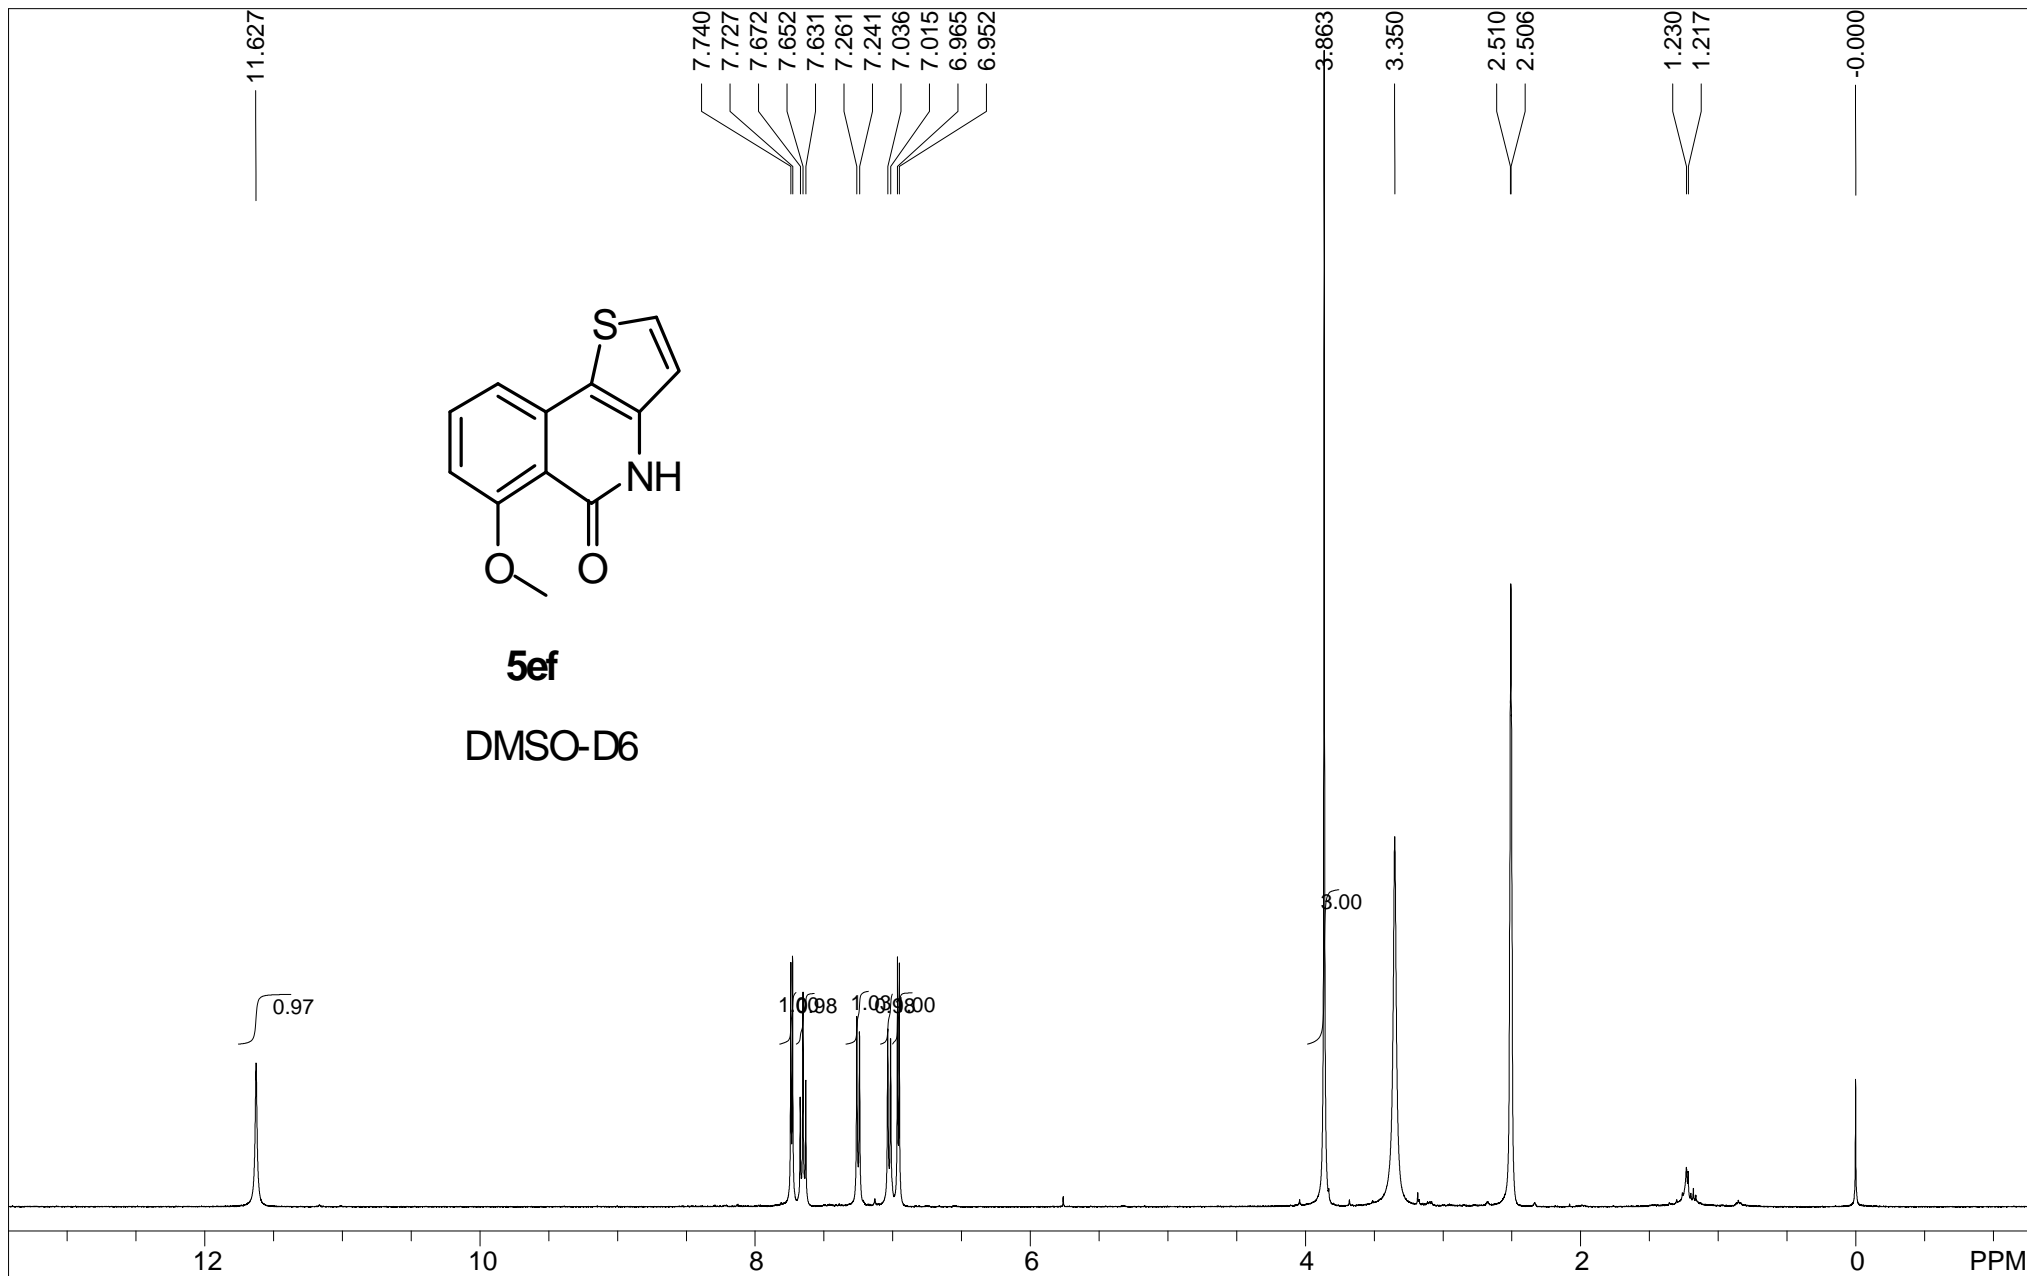

USER: fx -- DATE: 2017-05-26 14:21:30.615

|             |             |             |             |              |
|-------------|-------------|-------------|-------------|--------------|
| F1: 400.160 | F2: 1.000   | SW1: 8224   | OF1: 3199.9 | PTS1d: 65536 |
| EX: zg30    | PW: 12.8 us | PD: 1.0 sec | NA: 16      | LB: 0.3      |

Nuts - \$5ef-H1-DMSO 10.1



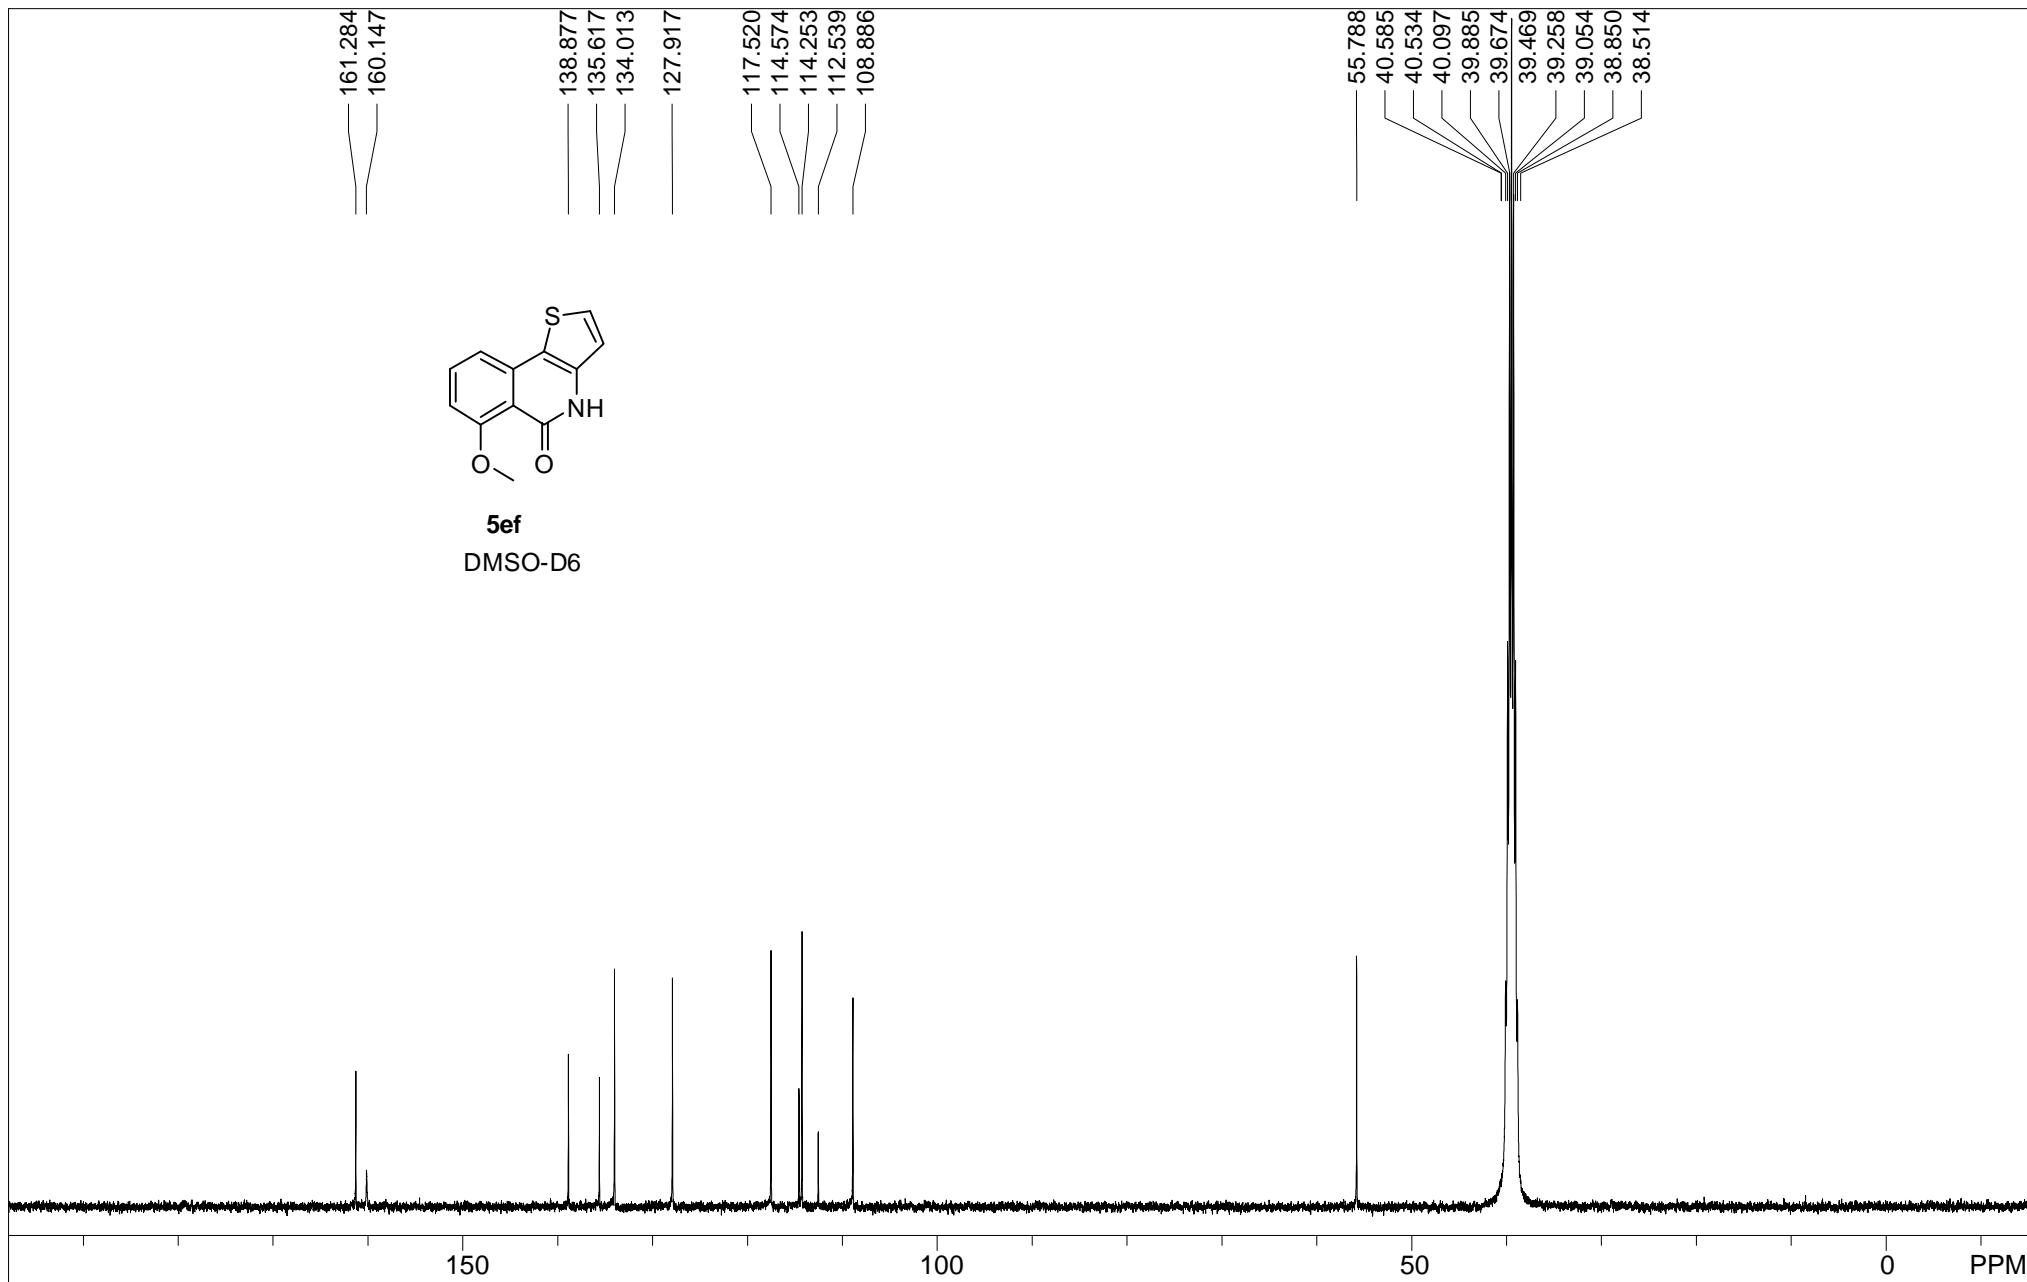

**5ef**  
DMSO-D6

USER: fx -- DATE: 2017-05-27 08:04:27.353

|             |            |             |              |                                                            |
|-------------|------------|-------------|--------------|------------------------------------------------------------|
| F1: 100.620 | F2: 1.000  | SW1: 24038  | OF1: 10011.3 | PTS1d: 32768                                               |
| EX: zpgg30  | PW: 9.0 us | PD: 2.0 sec | NA: 1024     | LB: 1.0 Nuts - \$P-0011167-5ef-C13-DMSO-20170526-CT54 20.1 |

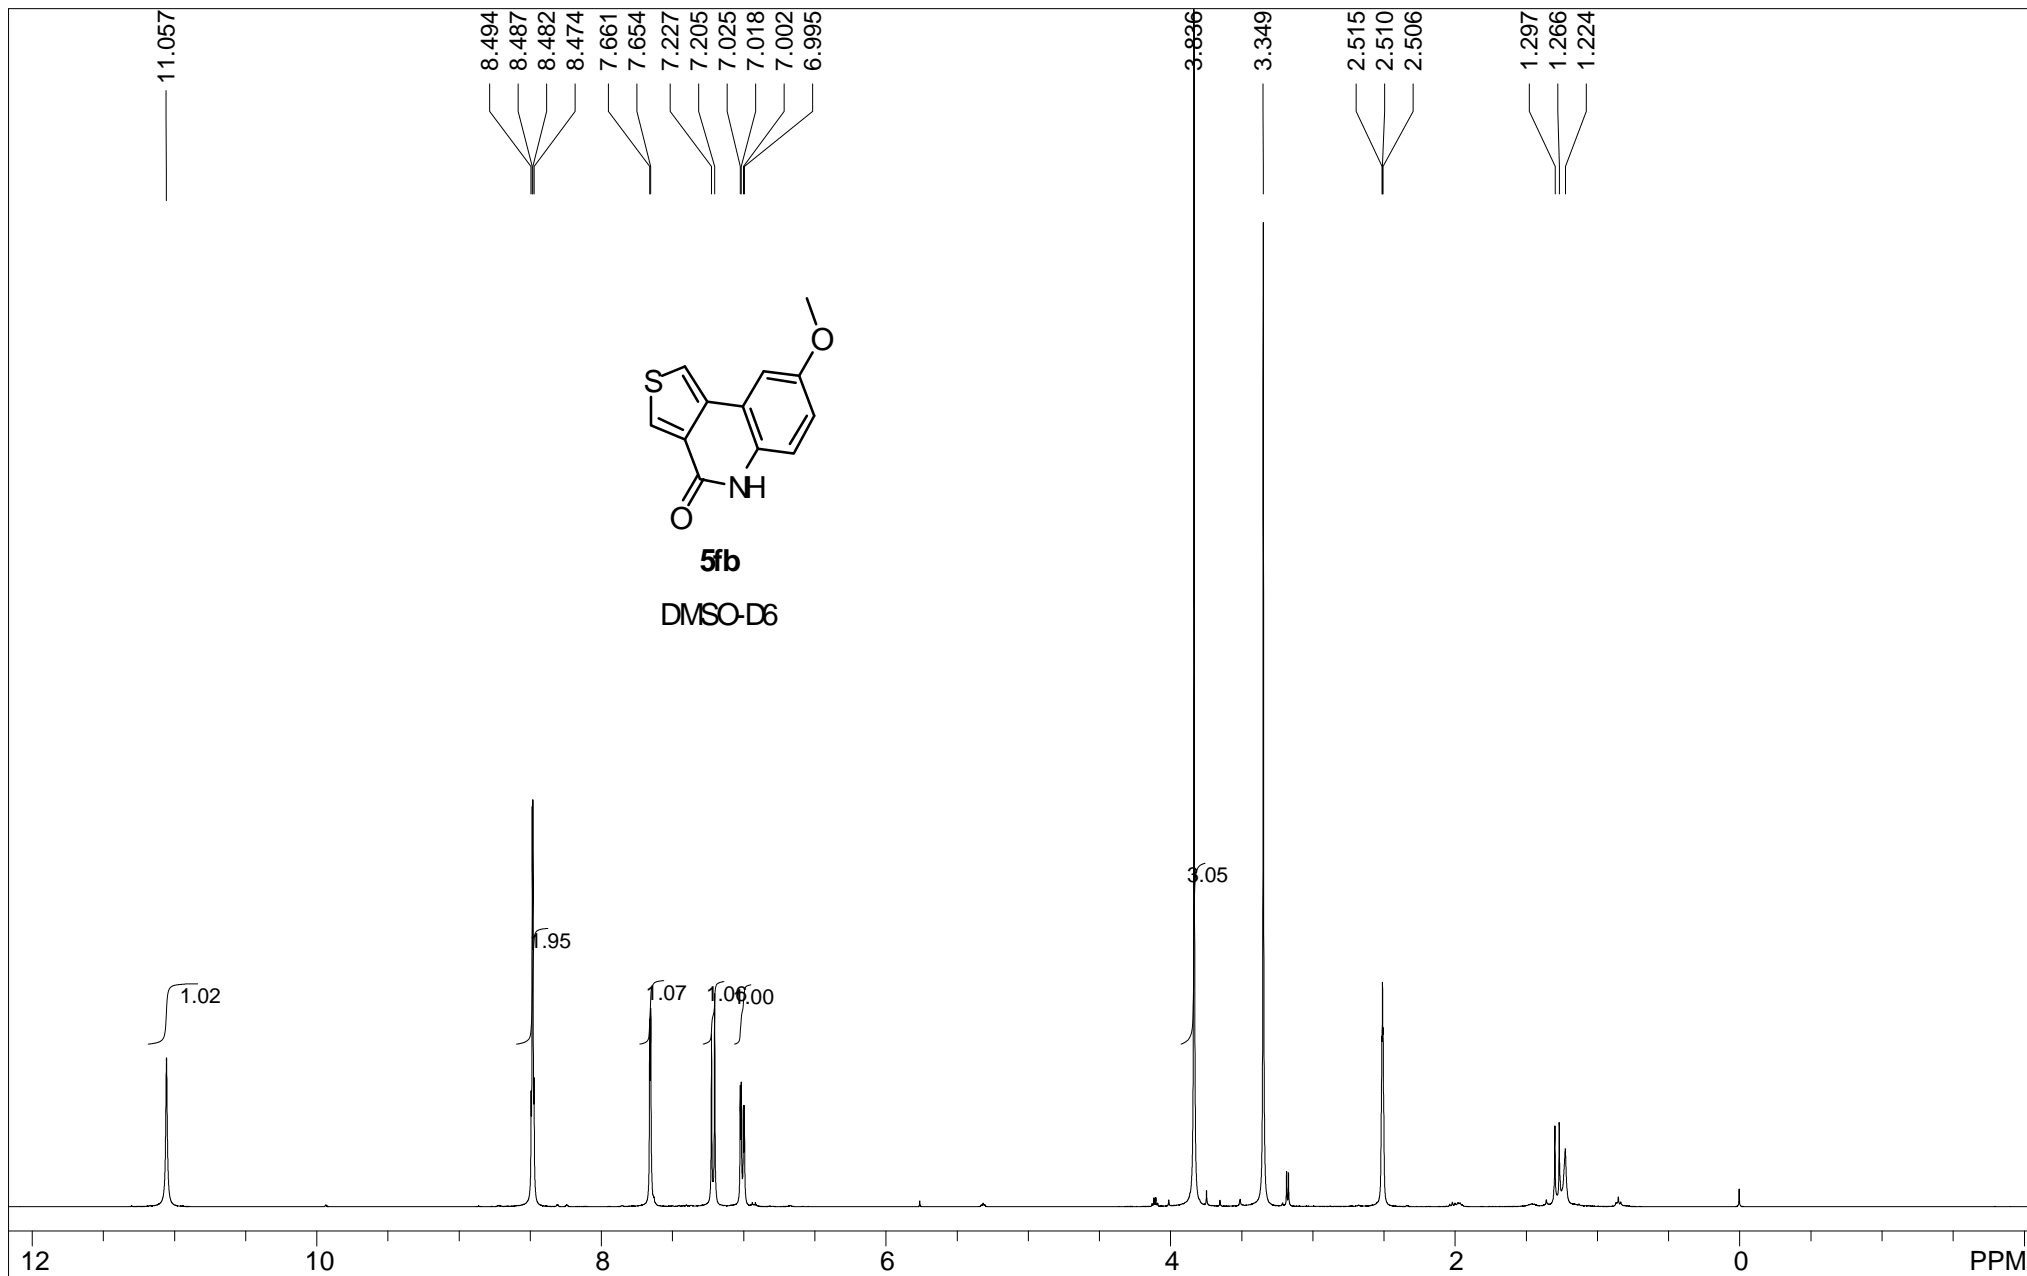

USER: fx -- DATE: 2017-05-05 07:42:26.163

|             |             |           |             |             |        |              |                           |
|-------------|-------------|-----------|-------------|-------------|--------|--------------|---------------------------|
| F1: 400.160 | F2: 1.000   | SW1: 8224 | PD: 1.0 sec | OF1: 3201.8 | NA: 16 | PTS1d: 65536 | LB: 0.3                   |
| EX: zg30    | PW: 12.8 us |           |             |             |        |              | Nuts - \$5fb-H1-DMSO 10.1 |

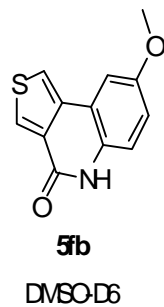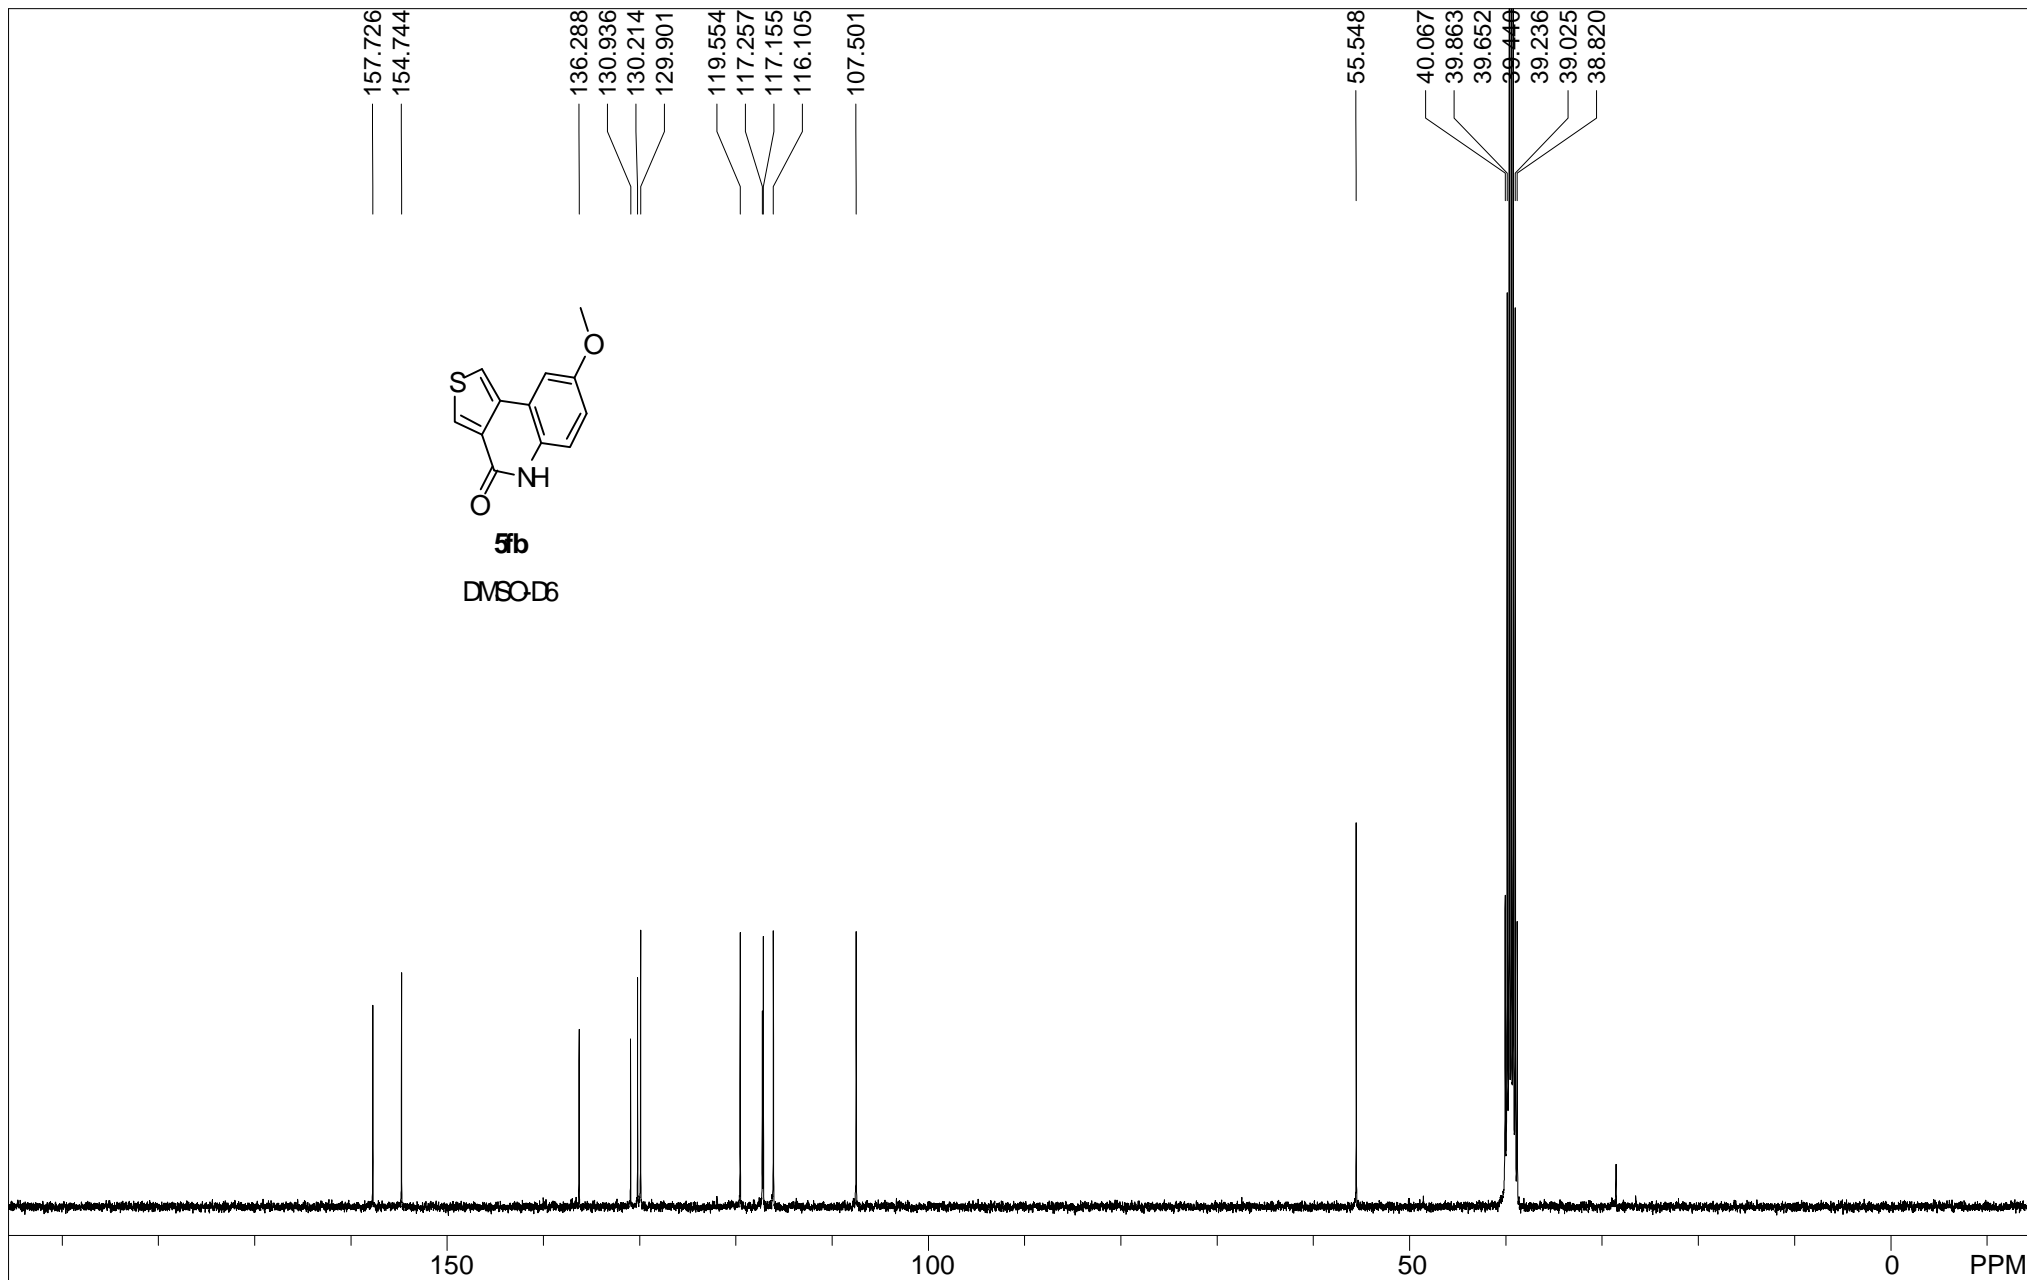

USER: fx -- DATE: 2017-05-07 07:53:10.561

|             |            |             |              |                                                  |
|-------------|------------|-------------|--------------|--------------------------------------------------|
| F1: 100.620 | F2: 1.000  | SW1: 24038  | OF1: 10011.3 | PTS1d: 32768                                     |
| EX: zpg30   | PW: 9.0 us | PD: 2.0 sec | NA: 1024     | SP-0011167-CPD7 (5b)-C13-DMSO-20170505-CT54 10.1 |

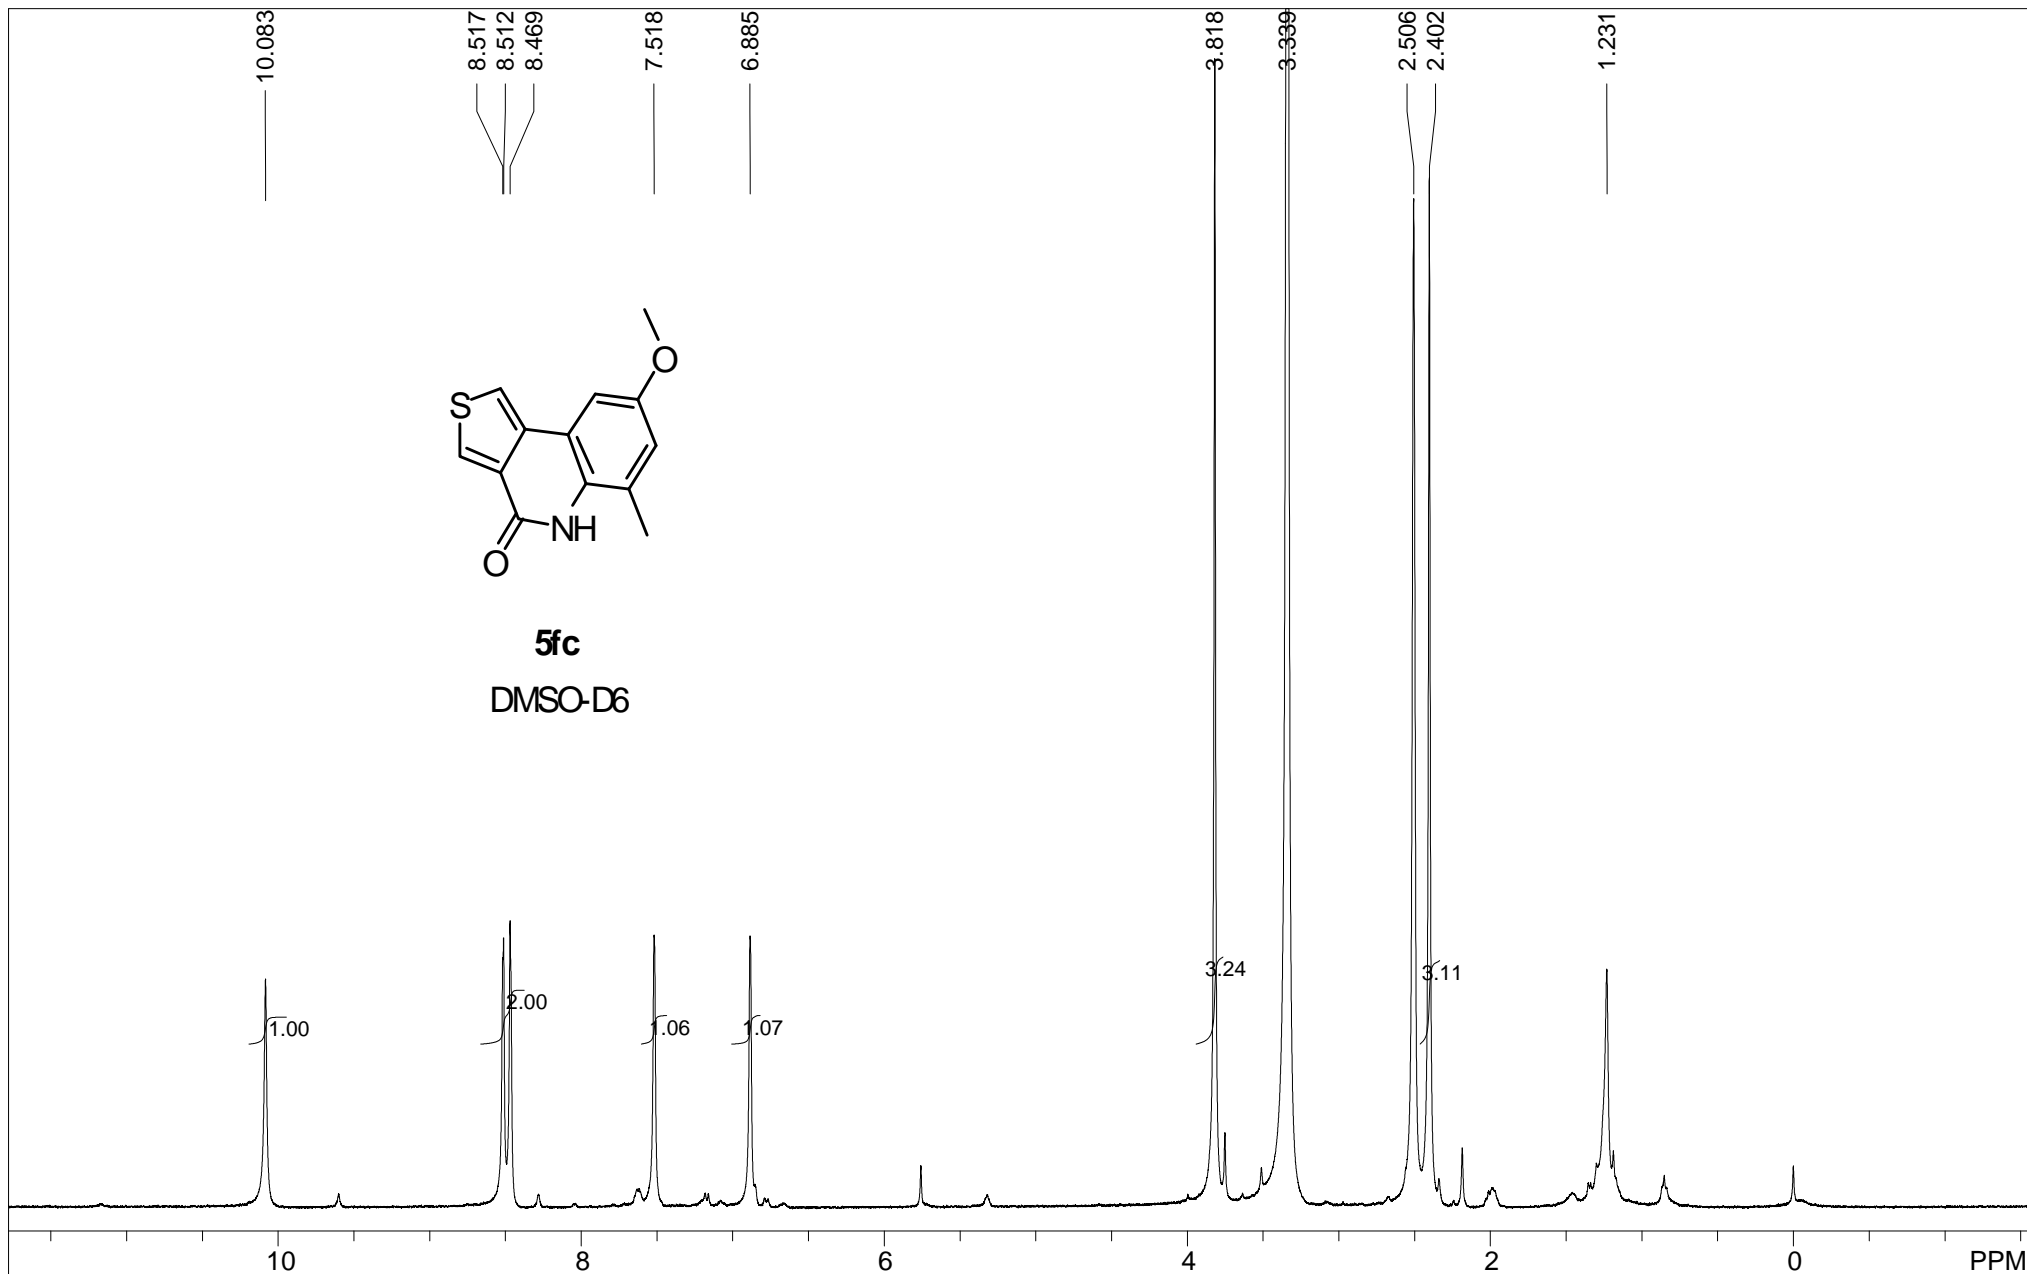

USER: fx -- DATE: 2017-06-06 13:48:49.350

|             |             |             |             |                           |
|-------------|-------------|-------------|-------------|---------------------------|
| F1: 400.160 | F2: 1.000   | SW1: 8224   | OF1: 3199.0 | PTS1d: 65536              |
| EX: zg30    | PW: 12.8 us | PD: 1.0 sec | NA: 16      | LB: 0.3                   |
|             |             |             |             | Nuts - \$5fc-H1-DMSO 10.1 |

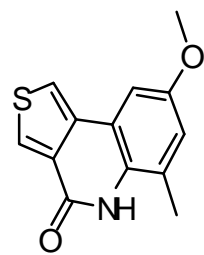

5c

DMSO-D6

158.047  
154.299  
136.595  
130.703  
130.025  
128.464  
125.803  
119.663  
117.520  
117.279  
105.269

55.431  
40.009  
39.798  
39.593  
39.387  
39.170  
38.966  
38.755  
17.915

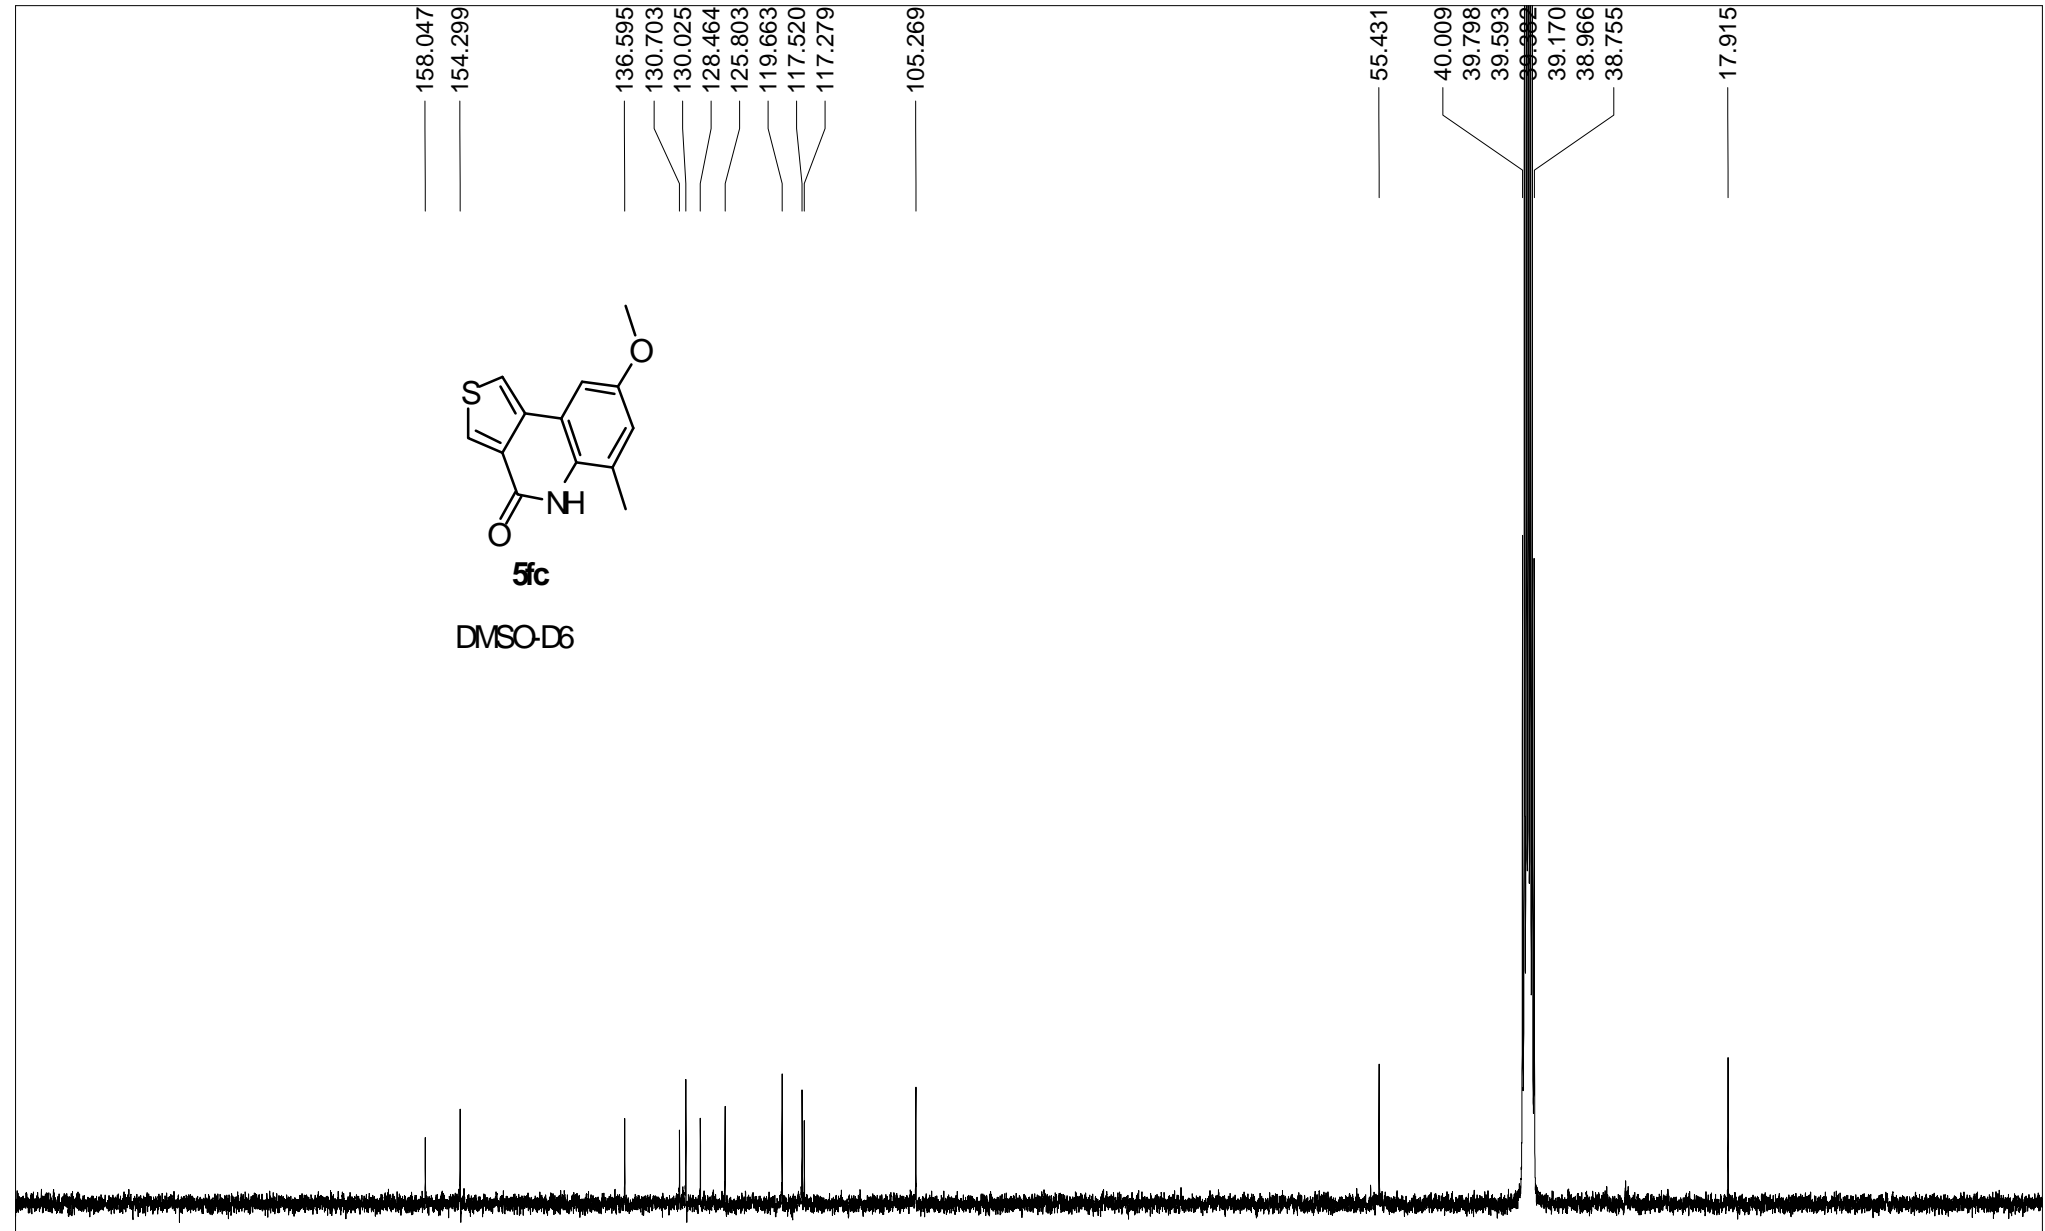

150

100

50

0

PPM

USER: fx -- DATE: 2017-06-08 01:55:13.346

|             |            |             |              |                                                            |
|-------------|------------|-------------|--------------|------------------------------------------------------------|
| F1: 100.620 | F2: 1.000  | SW1: 24038  | OF1: 10011.3 | PTS1d: 32768                                               |
| EX: zpgp30  | PW: 9.0 us | PD: 2.0 sec | NA: 1024     | LB: 1.0 Nuts - \$P-0011167-5fc-C13-DMSO-20170607-CT54 20.1 |

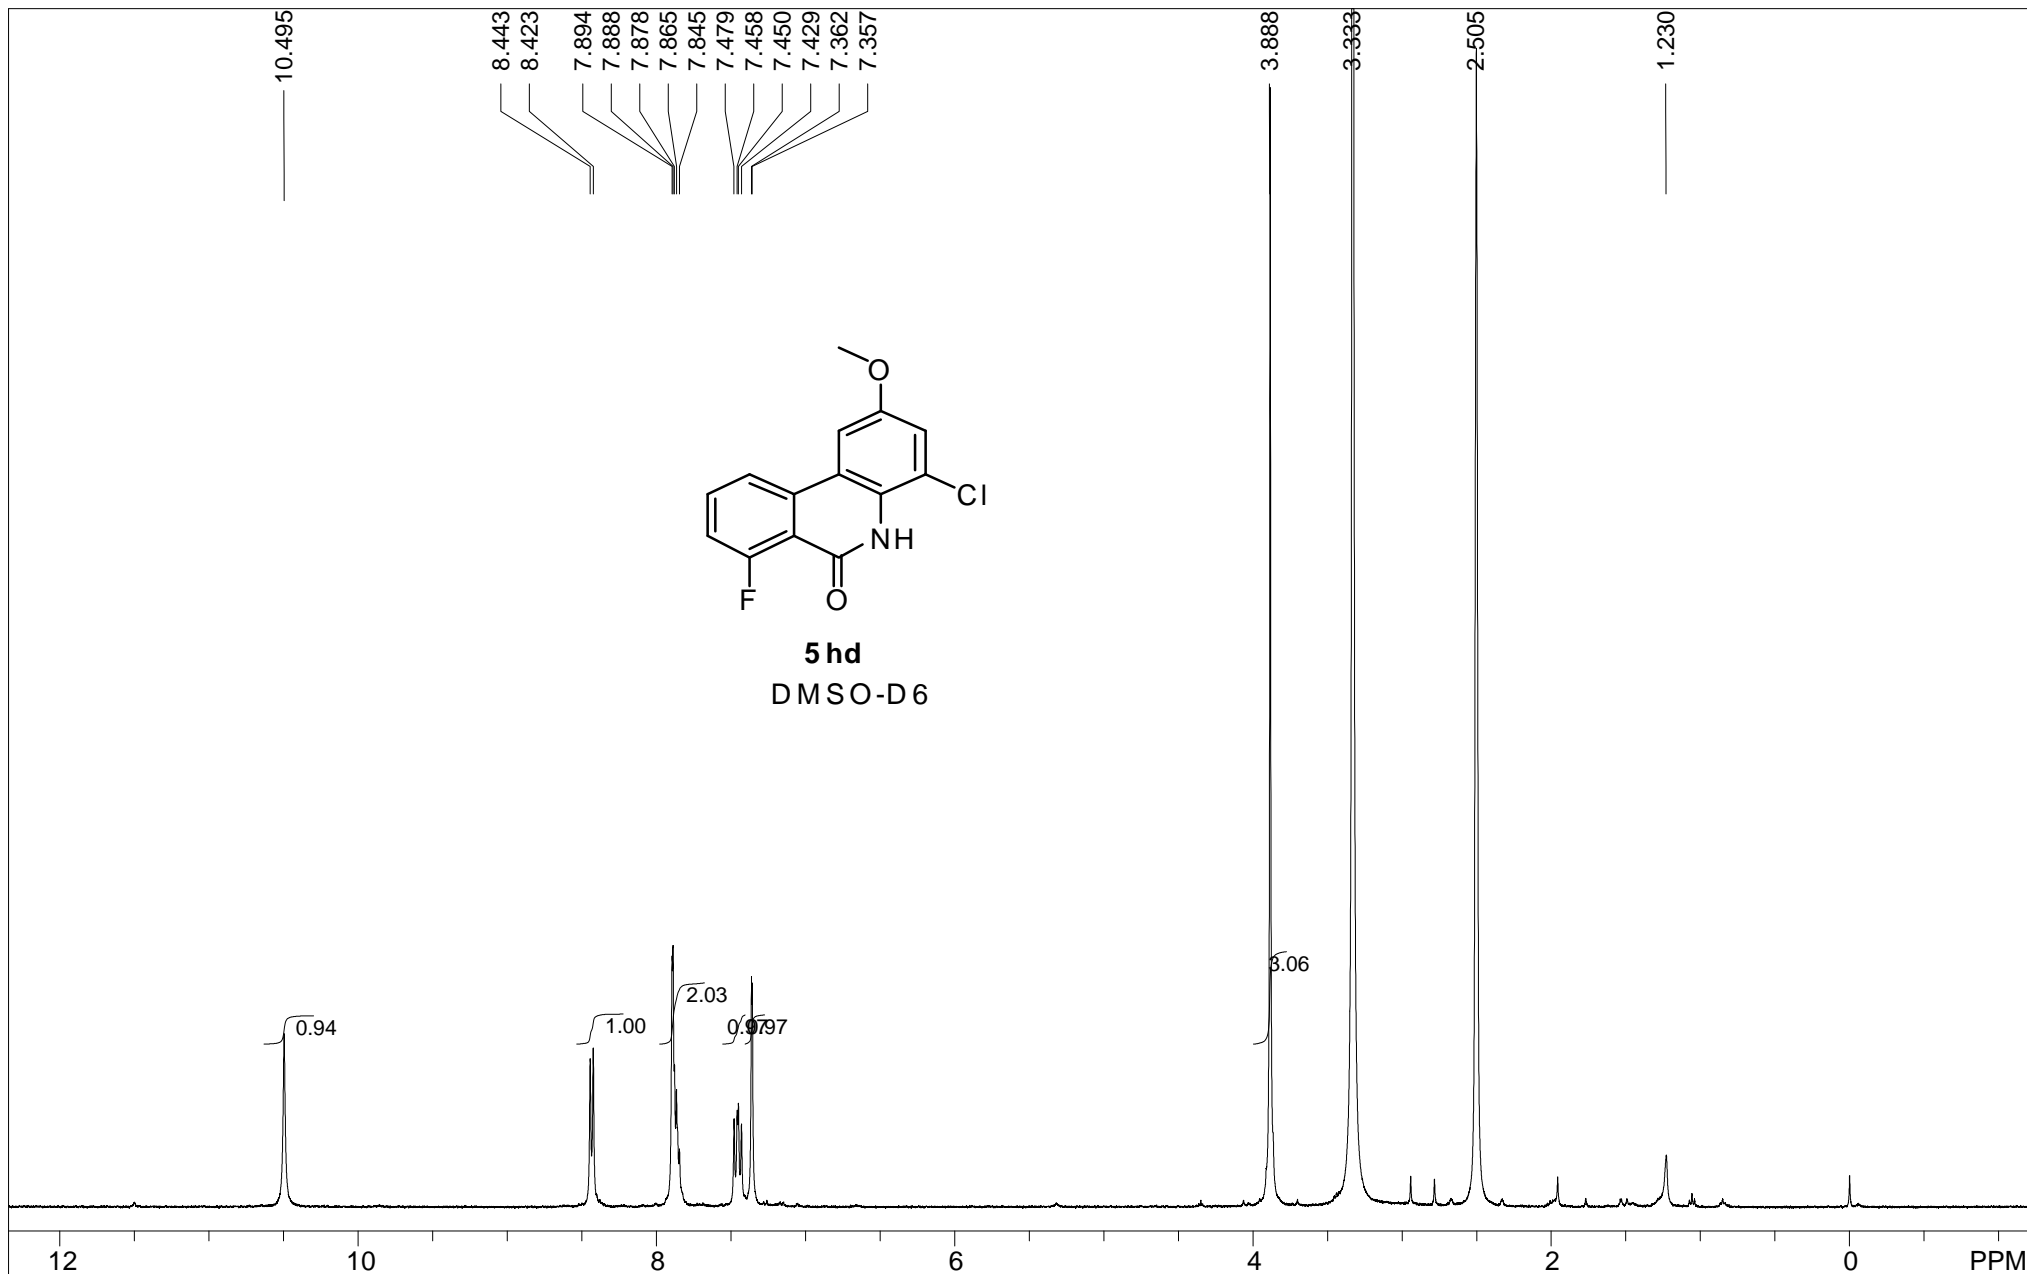

USER: fx -- DATE: 2017-07-14 09:32:02.465

|             |             |             |             |                           |
|-------------|-------------|-------------|-------------|---------------------------|
| F1: 400.160 | F2: 1.000   | SW1: 8224   | OF1: 3199.2 | PTS1d: 65536              |
| EX: zg30    | PW: 12.8 us | PD: 1.0 sec | NA: 16      | LB: 0.3                   |
|             |             |             |             | Nuts - \$5hd-H1-DMSO 10.1 |

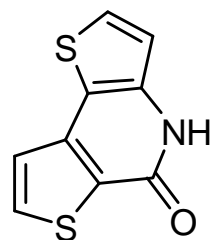

5if

DMSO-D6

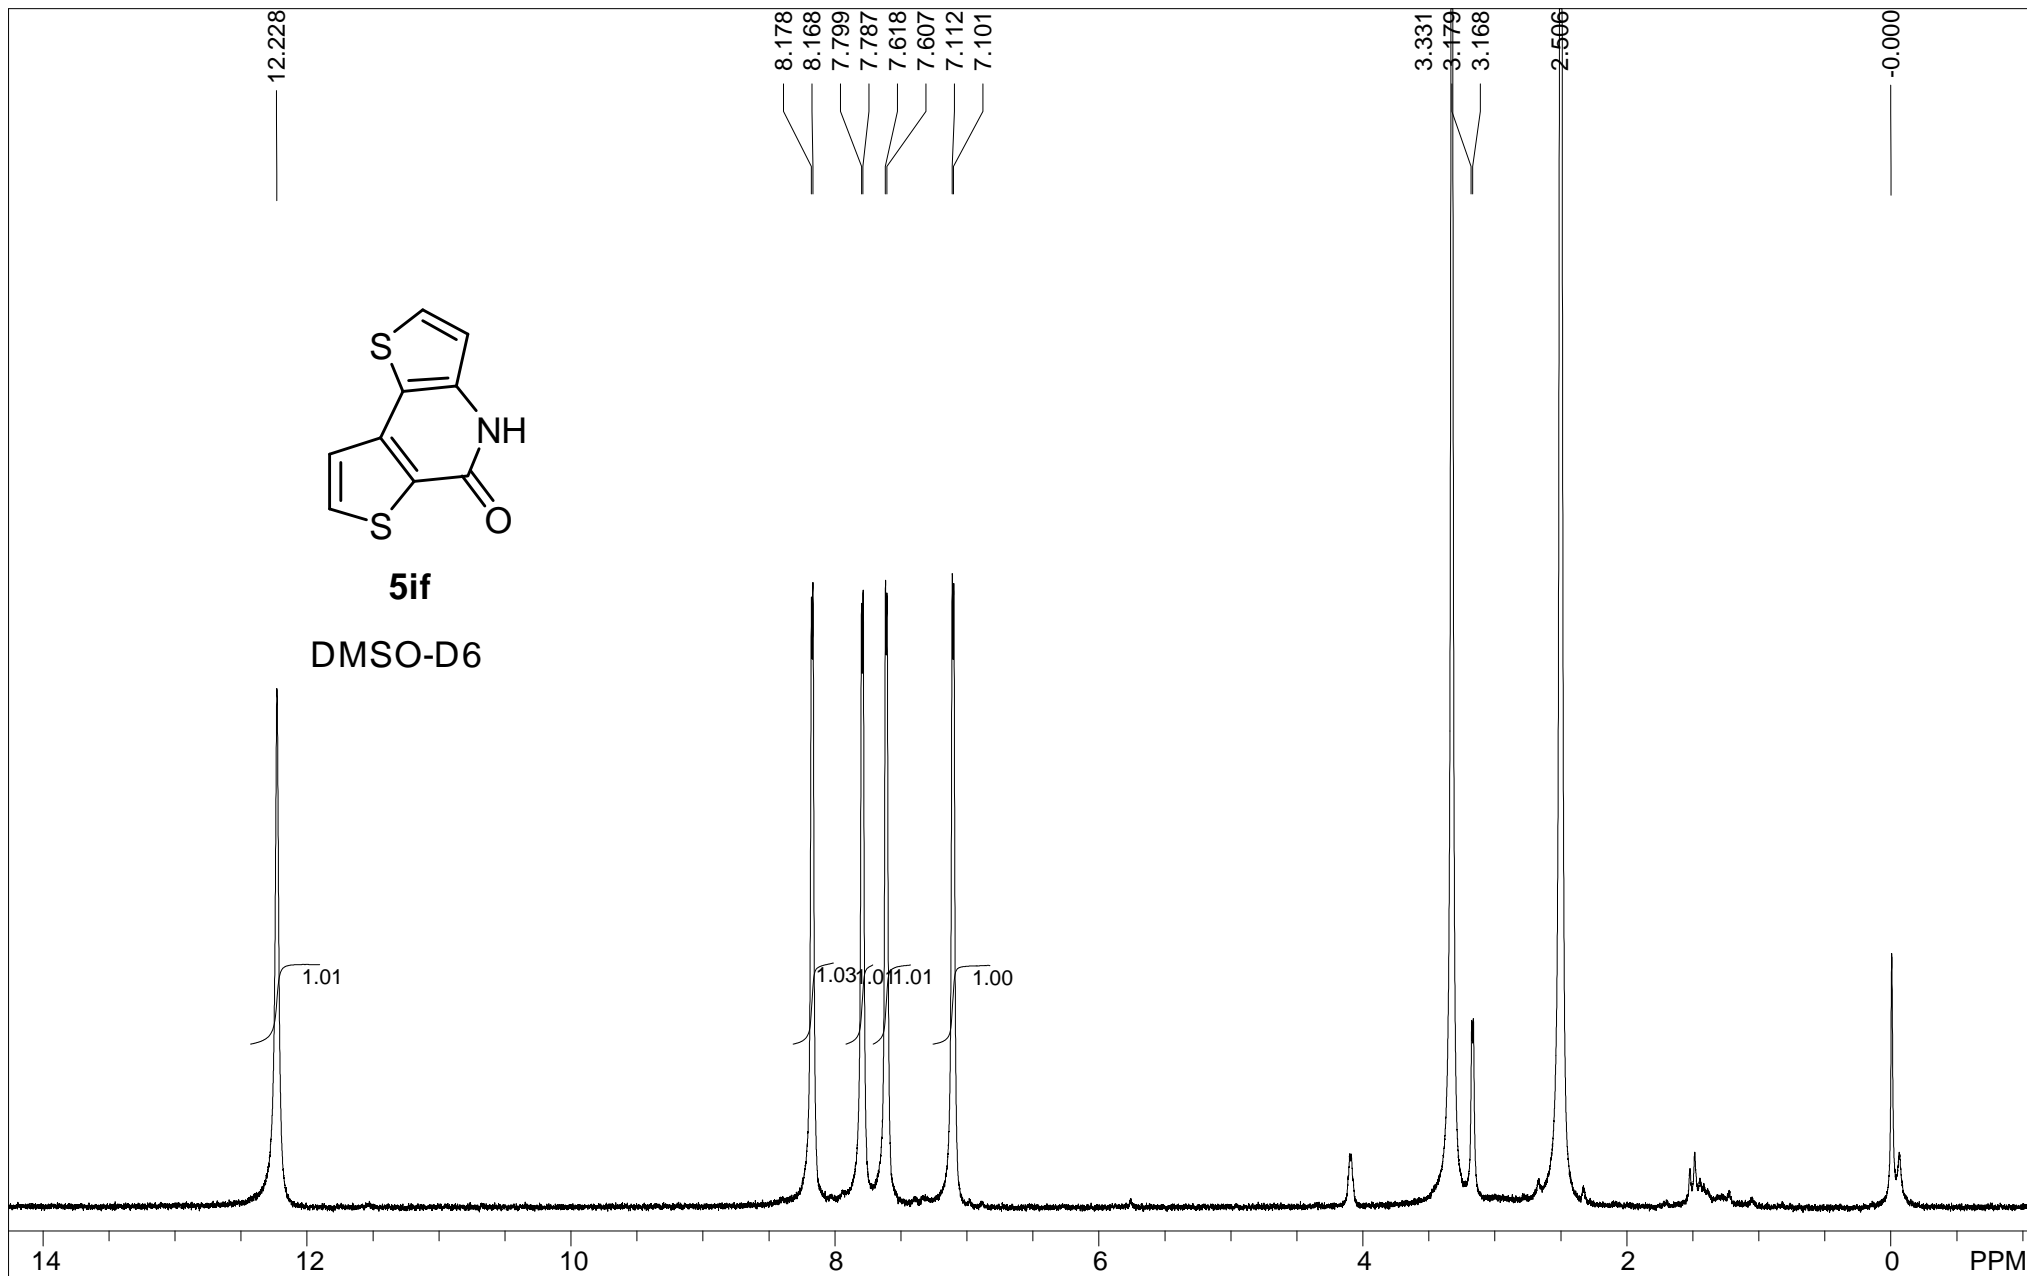

|                                           |             |           |             |             |         |                           |
|-------------------------------------------|-------------|-----------|-------------|-------------|---------|---------------------------|
| USER: fx -- DATE: 2017-06-02 09:58:49.500 |             |           |             |             |         |                           |
| F1: 400.160                               | F2: 1.000   | SW1: 8224 | PD: 1.0 sec | OF1: 3198.7 | LB: 0.3 | PTS1d: 65536              |
| EX: zg30                                  | PW: 12.8 us | NA: 16    |             |             |         | Nuts - \$5if-H1-DMSO 10.1 |

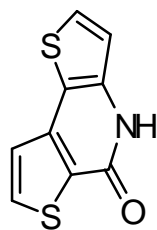

5f

DMSO-D6

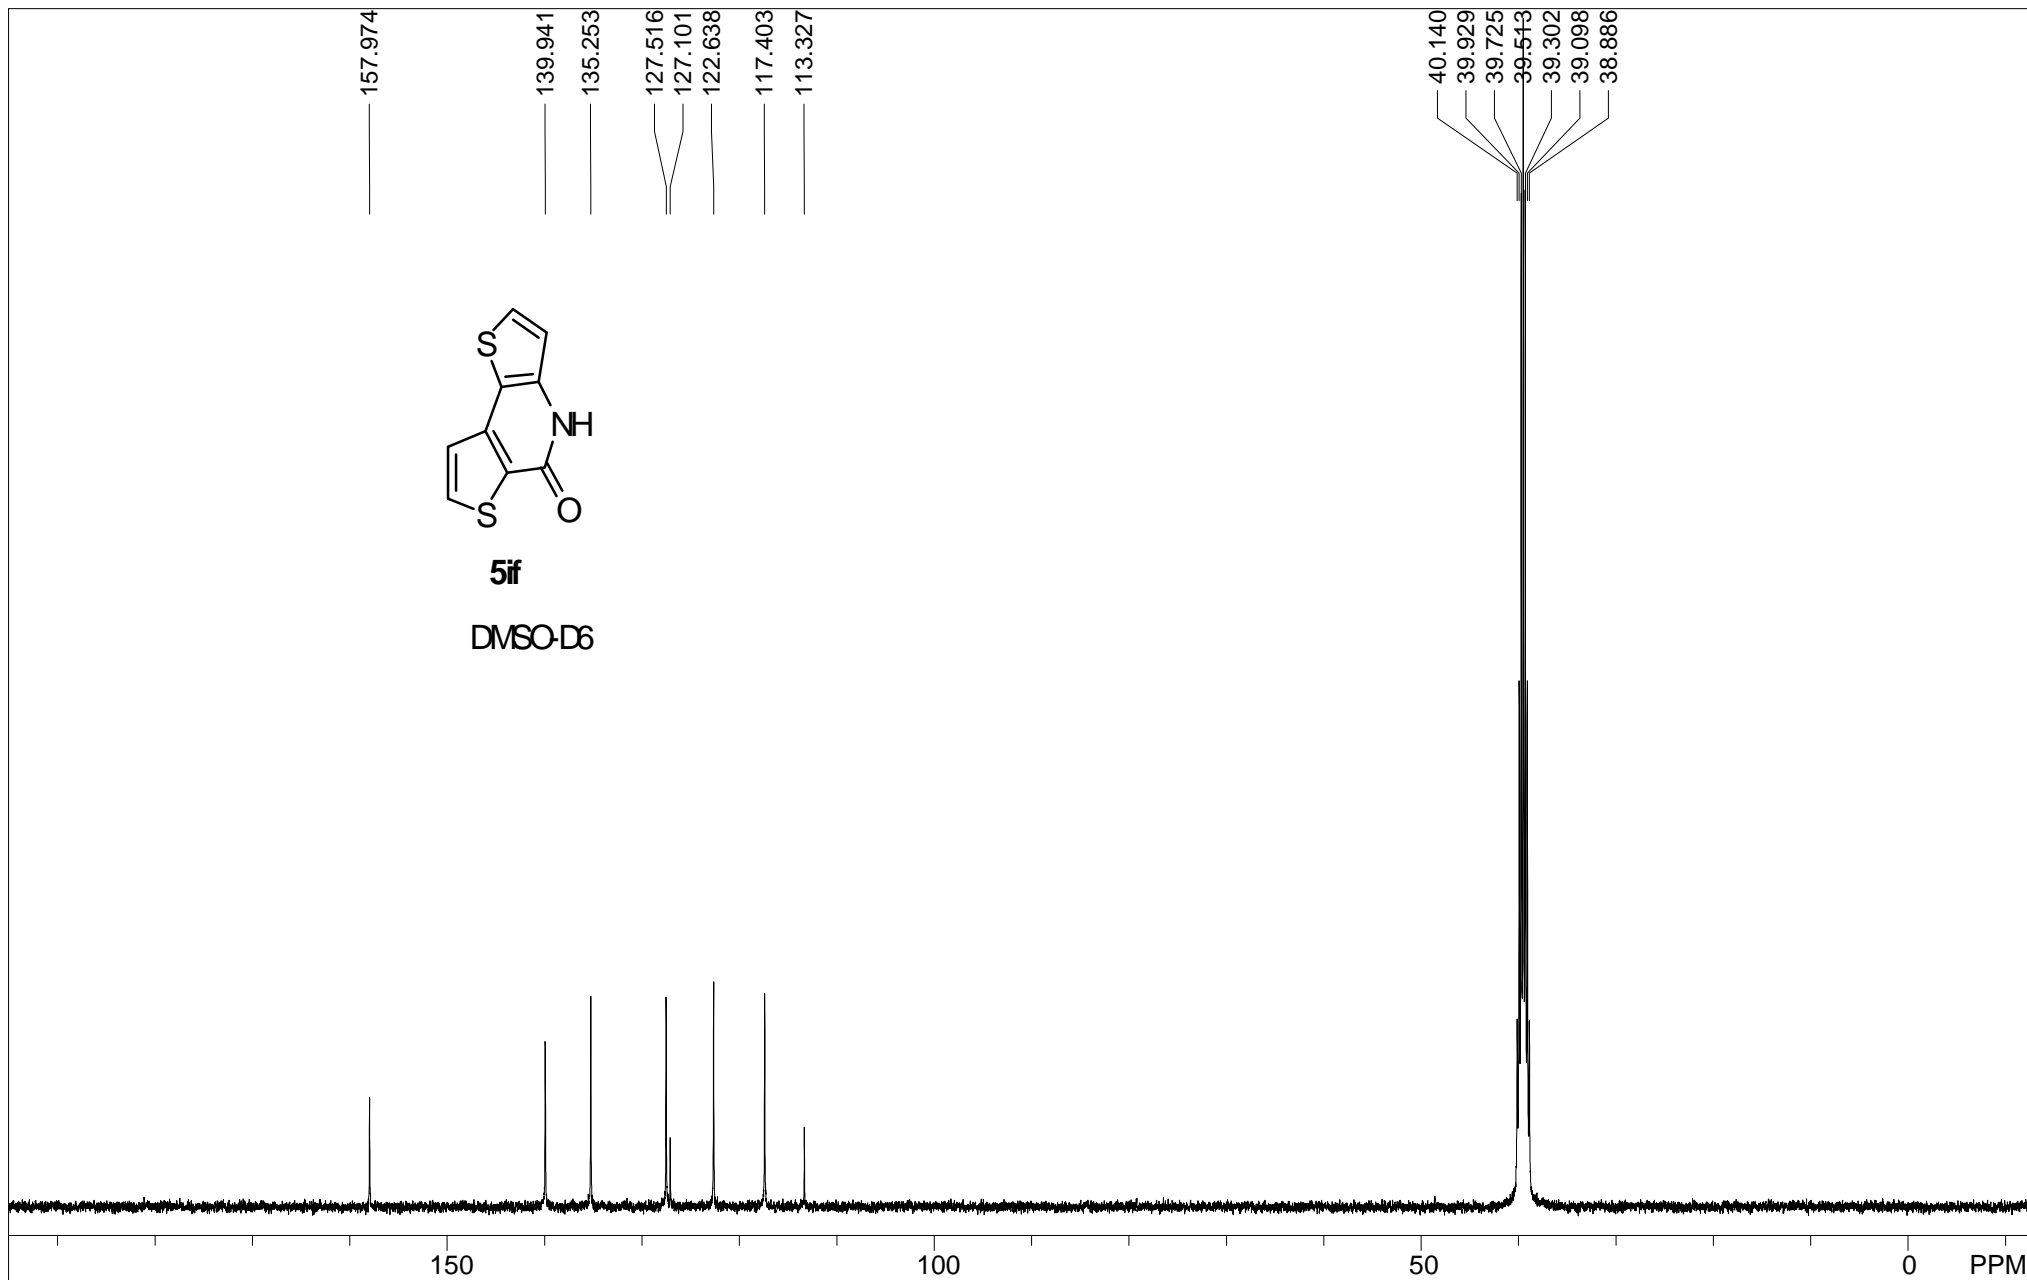

USER: fx -- DATE: 2017-06-02 22:29:33.638

|             |            |             |              |                                                            |
|-------------|------------|-------------|--------------|------------------------------------------------------------|
| F1: 100.620 | F2: 1.000  | SW1: 24038  | OF1: 10011.3 | PTS1d: 32768                                               |
| EX: zgpg30  | PW: 9.0 us | PD: 2.0 sec | NA: 1024     | LB: 1.0 Nuts - SSP-0011167-5if-C13-DMSO-20170602-CT54 20.1 |



8.925  
 8.430  
 8.410  
 8.355  
 8.187  
 8.167  
 7.753  
 7.734  
 7.716  
 7.699  
 7.679  
 7.379  
 7.360  
 7.340  
 7.281  
 5.320  
 3.087  
 2.597  
 2.571  
 1.586  
 1.517  
 1.273

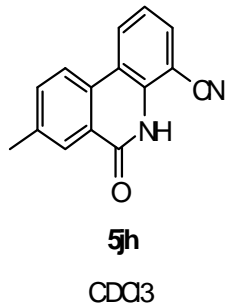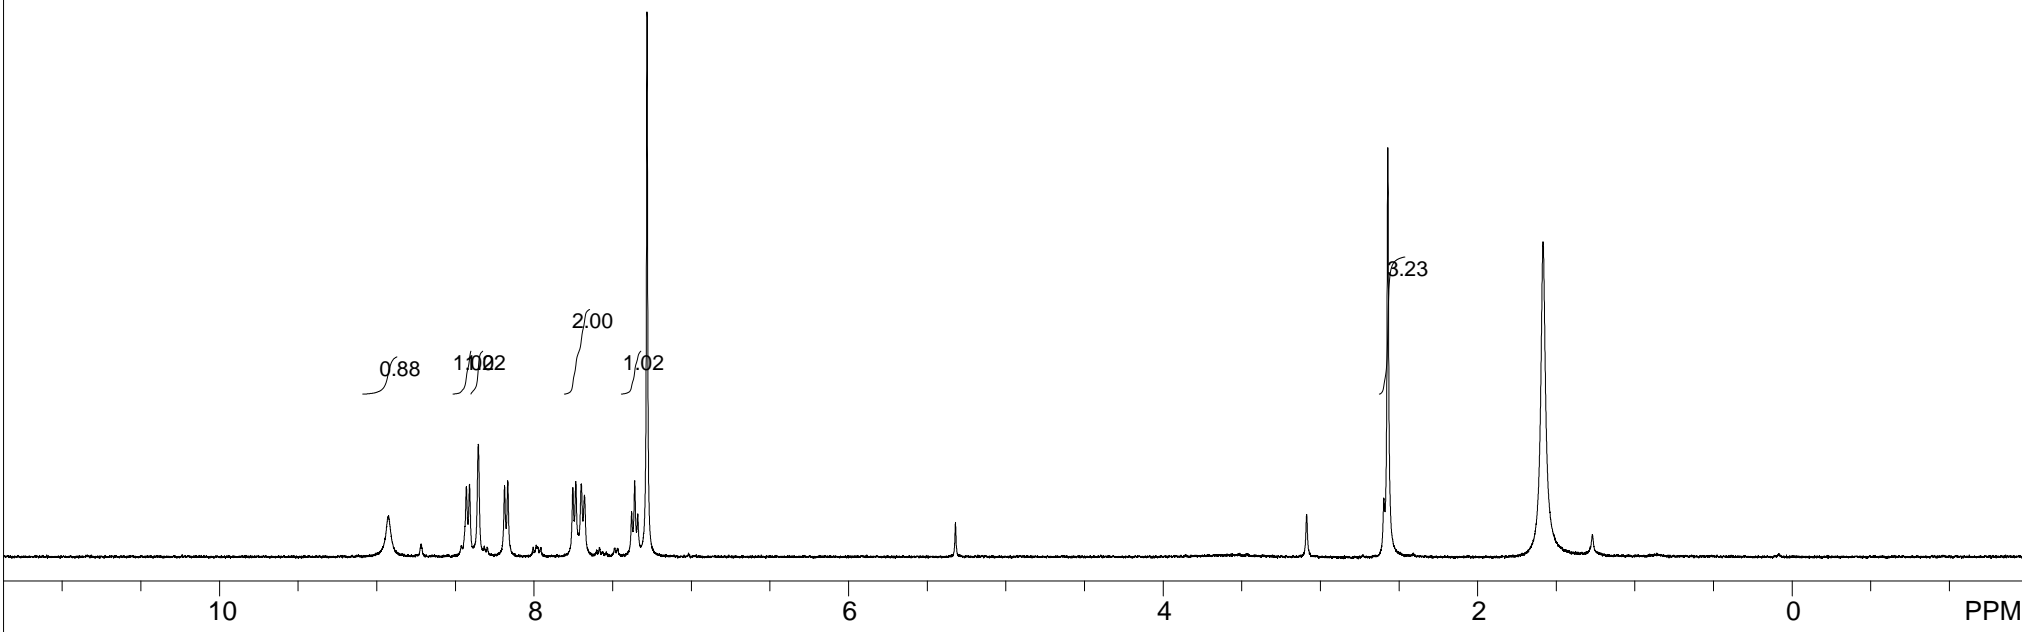

|                                           |           |             |             |             |         |                            |
|-------------------------------------------|-----------|-------------|-------------|-------------|---------|----------------------------|
| USER: fx -- DATE: 2017-06-20 10:32:55.345 |           |             |             |             |         |                            |
| F1: 400.160                               | F2: 1.000 | SW1: 8224   | PD: 1.0 sec | OF1: 3201.3 | LB: 0.3 | PTS1d: 65536               |
| EX: zg30                                  |           | PW: 12.8 us |             | NA: 16      |         | Nuts - \$5jh-H1-CDCl3 10.1 |

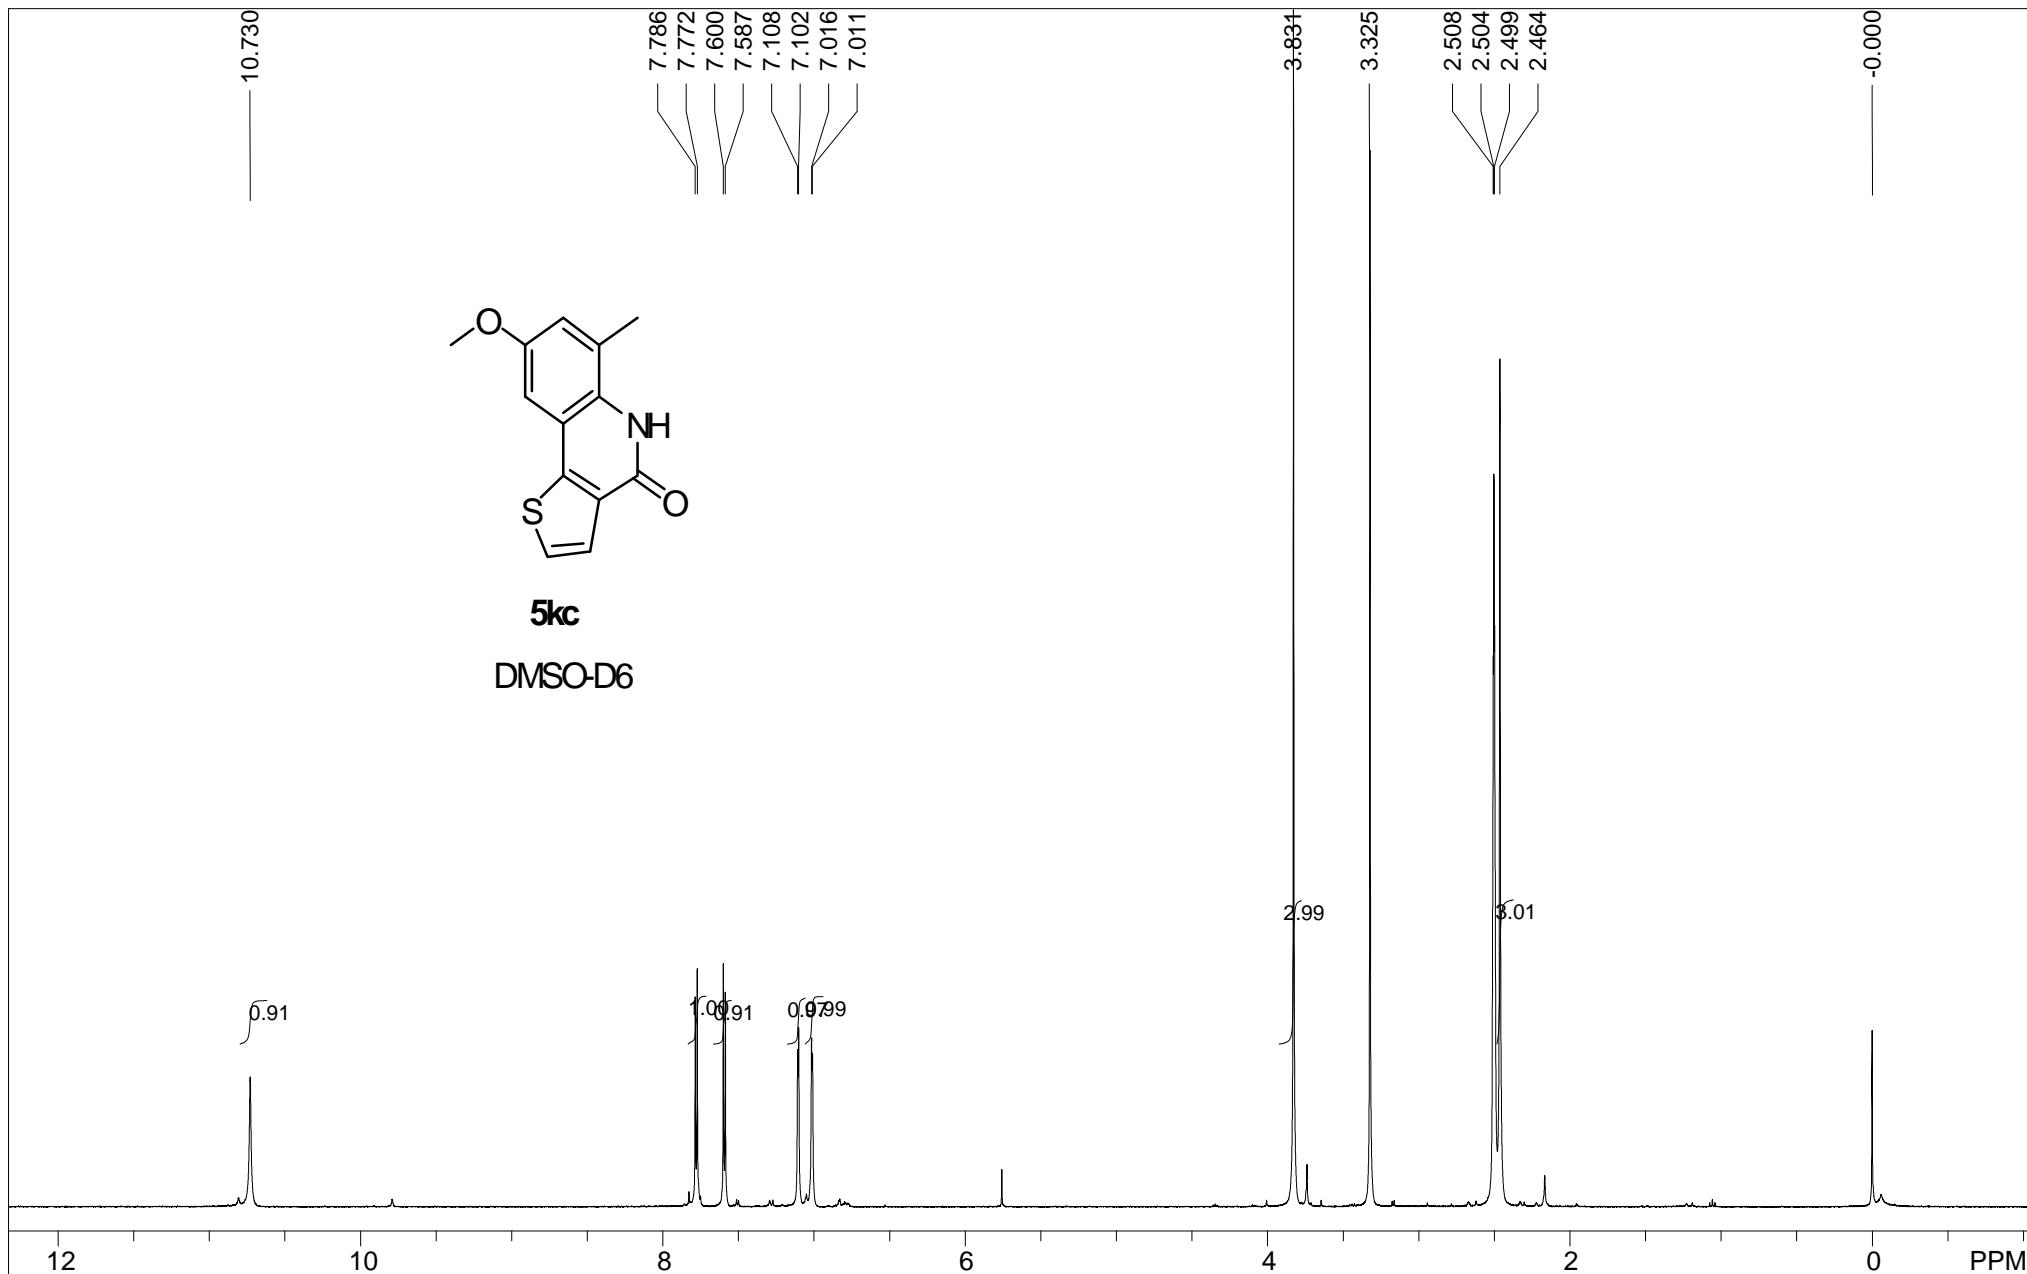

USER: fx -- DATE: 2017-05-12 10:17:19.512

|             |             |             |             |                           |
|-------------|-------------|-------------|-------------|---------------------------|
| F1: 400.160 | F2: 1.000   | SW1: 8224   | OF1: 3199.2 | PTS1d: 65536              |
| EX: zg30    | PW: 12.8 us | PD: 1.0 sec | NA: 16      | LB: 0.3                   |
|             |             |             |             | Nuts - \$5kc-H1-DMSO 10.1 |

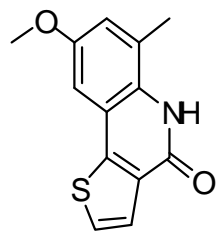

5kc

DMSO-D6

158.047  
154.124  
145.840  
131.140  
128.960  
126.671  
126.437  
125.343  
119.262  
116.798  
103.104

55.431  
40.118  
39.914  
39.703  
39.494  
39.287  
39.076  
38.864  
17.799

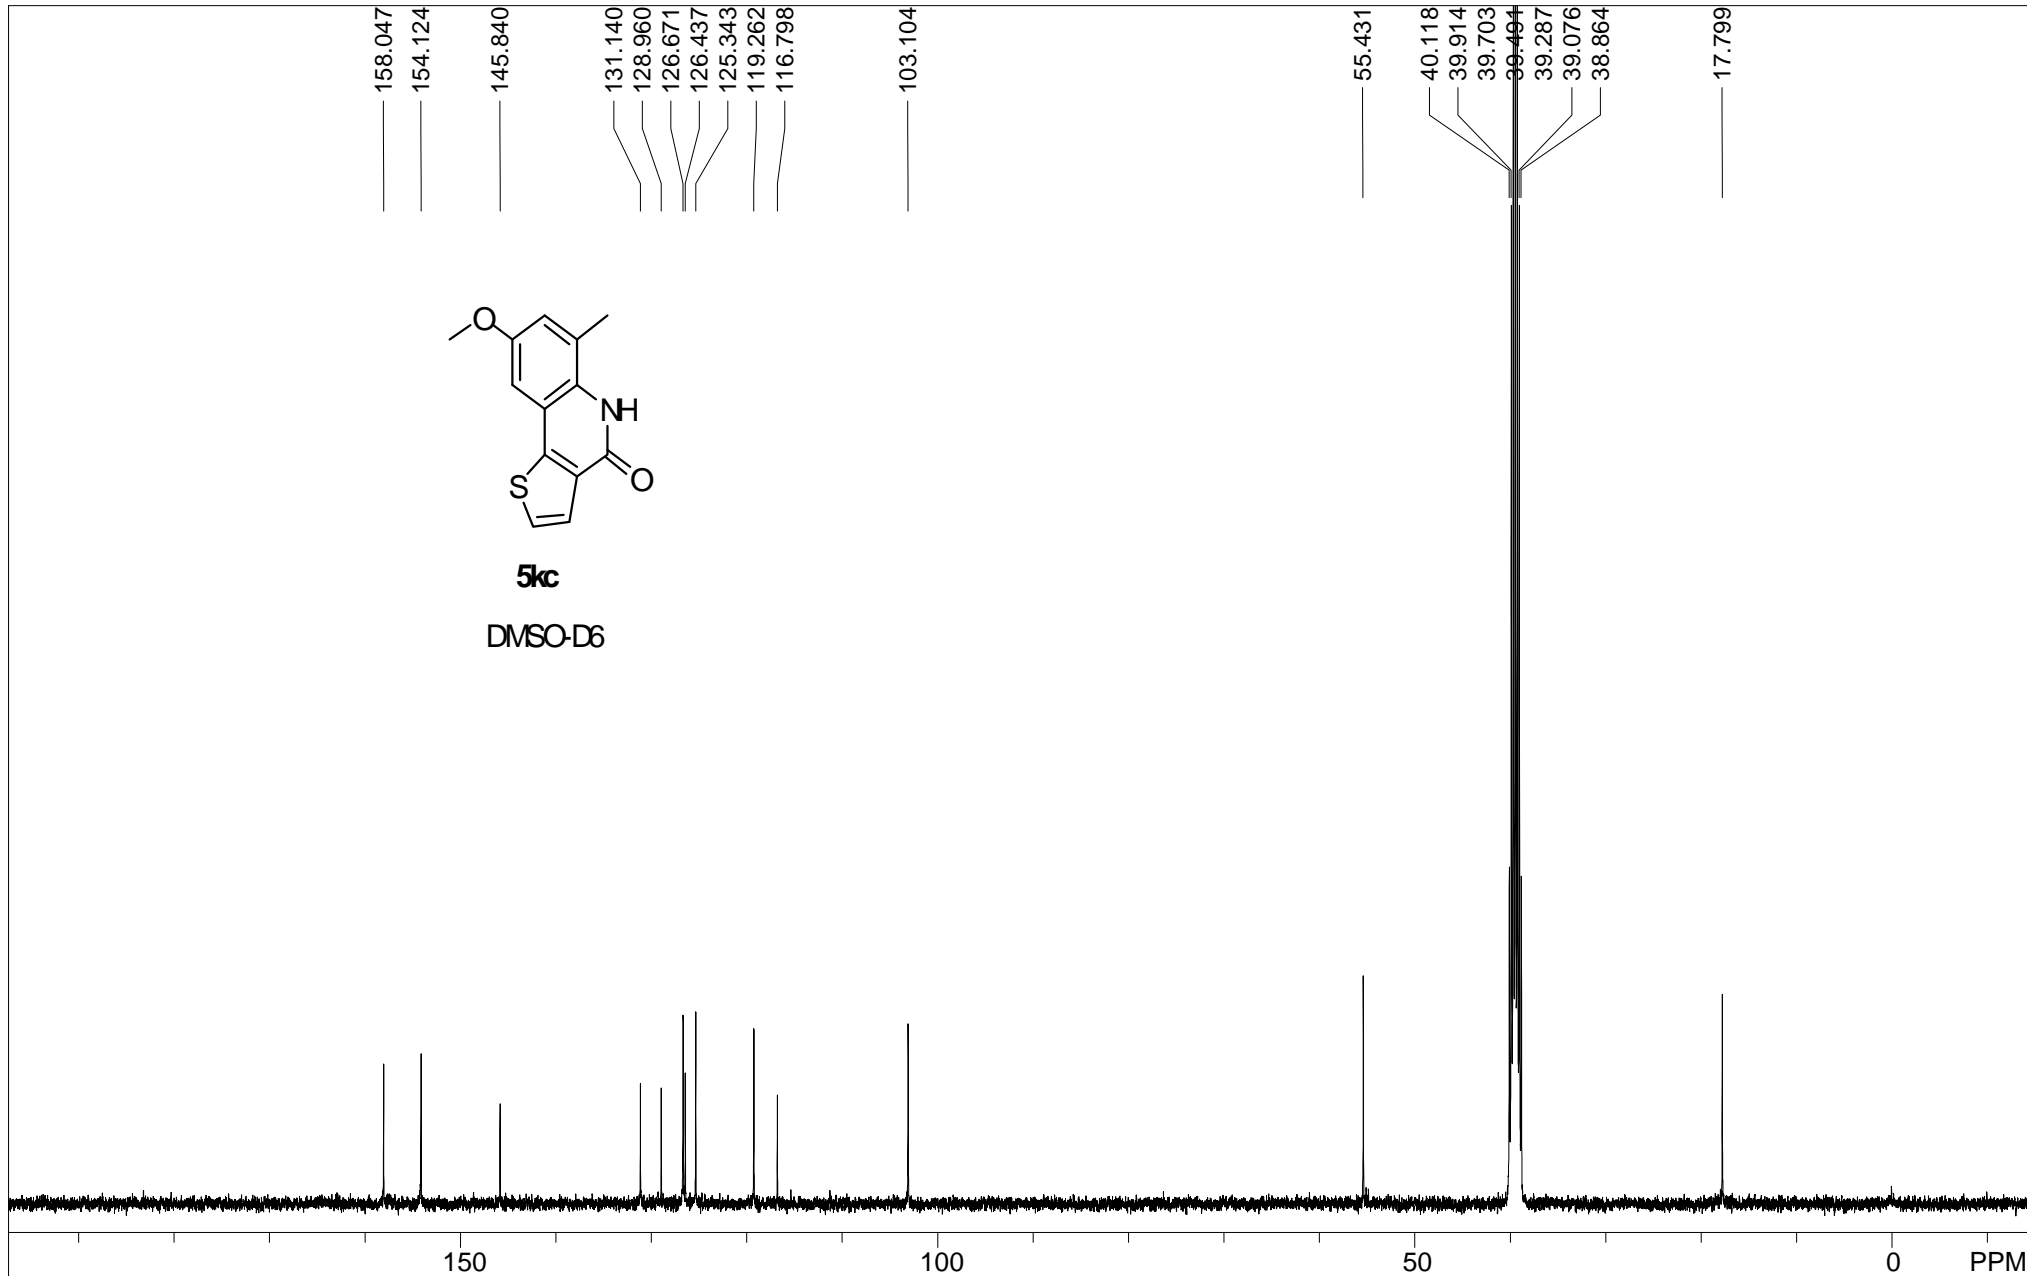

USER: fx -- DATE: 2017-05-13 00:56:44.436

|             |            |             |              |                                                             |
|-------------|------------|-------------|--------------|-------------------------------------------------------------|
| F1: 100.620 | F2: 1.000  | SW1: 24038  | OF1: 10011.3 | PTS1d: 32768                                                |
| EX: zgpg30  | PW: 9.0 us | PD: 2.0 sec | NA: 1024     | LB: 1.0 Nuts - \$SP-0011167-5kc-C13-DMSO-20170512-CT54 10.1 |

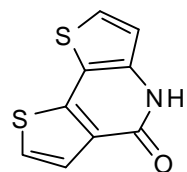

**5kf**

DMSO-D6

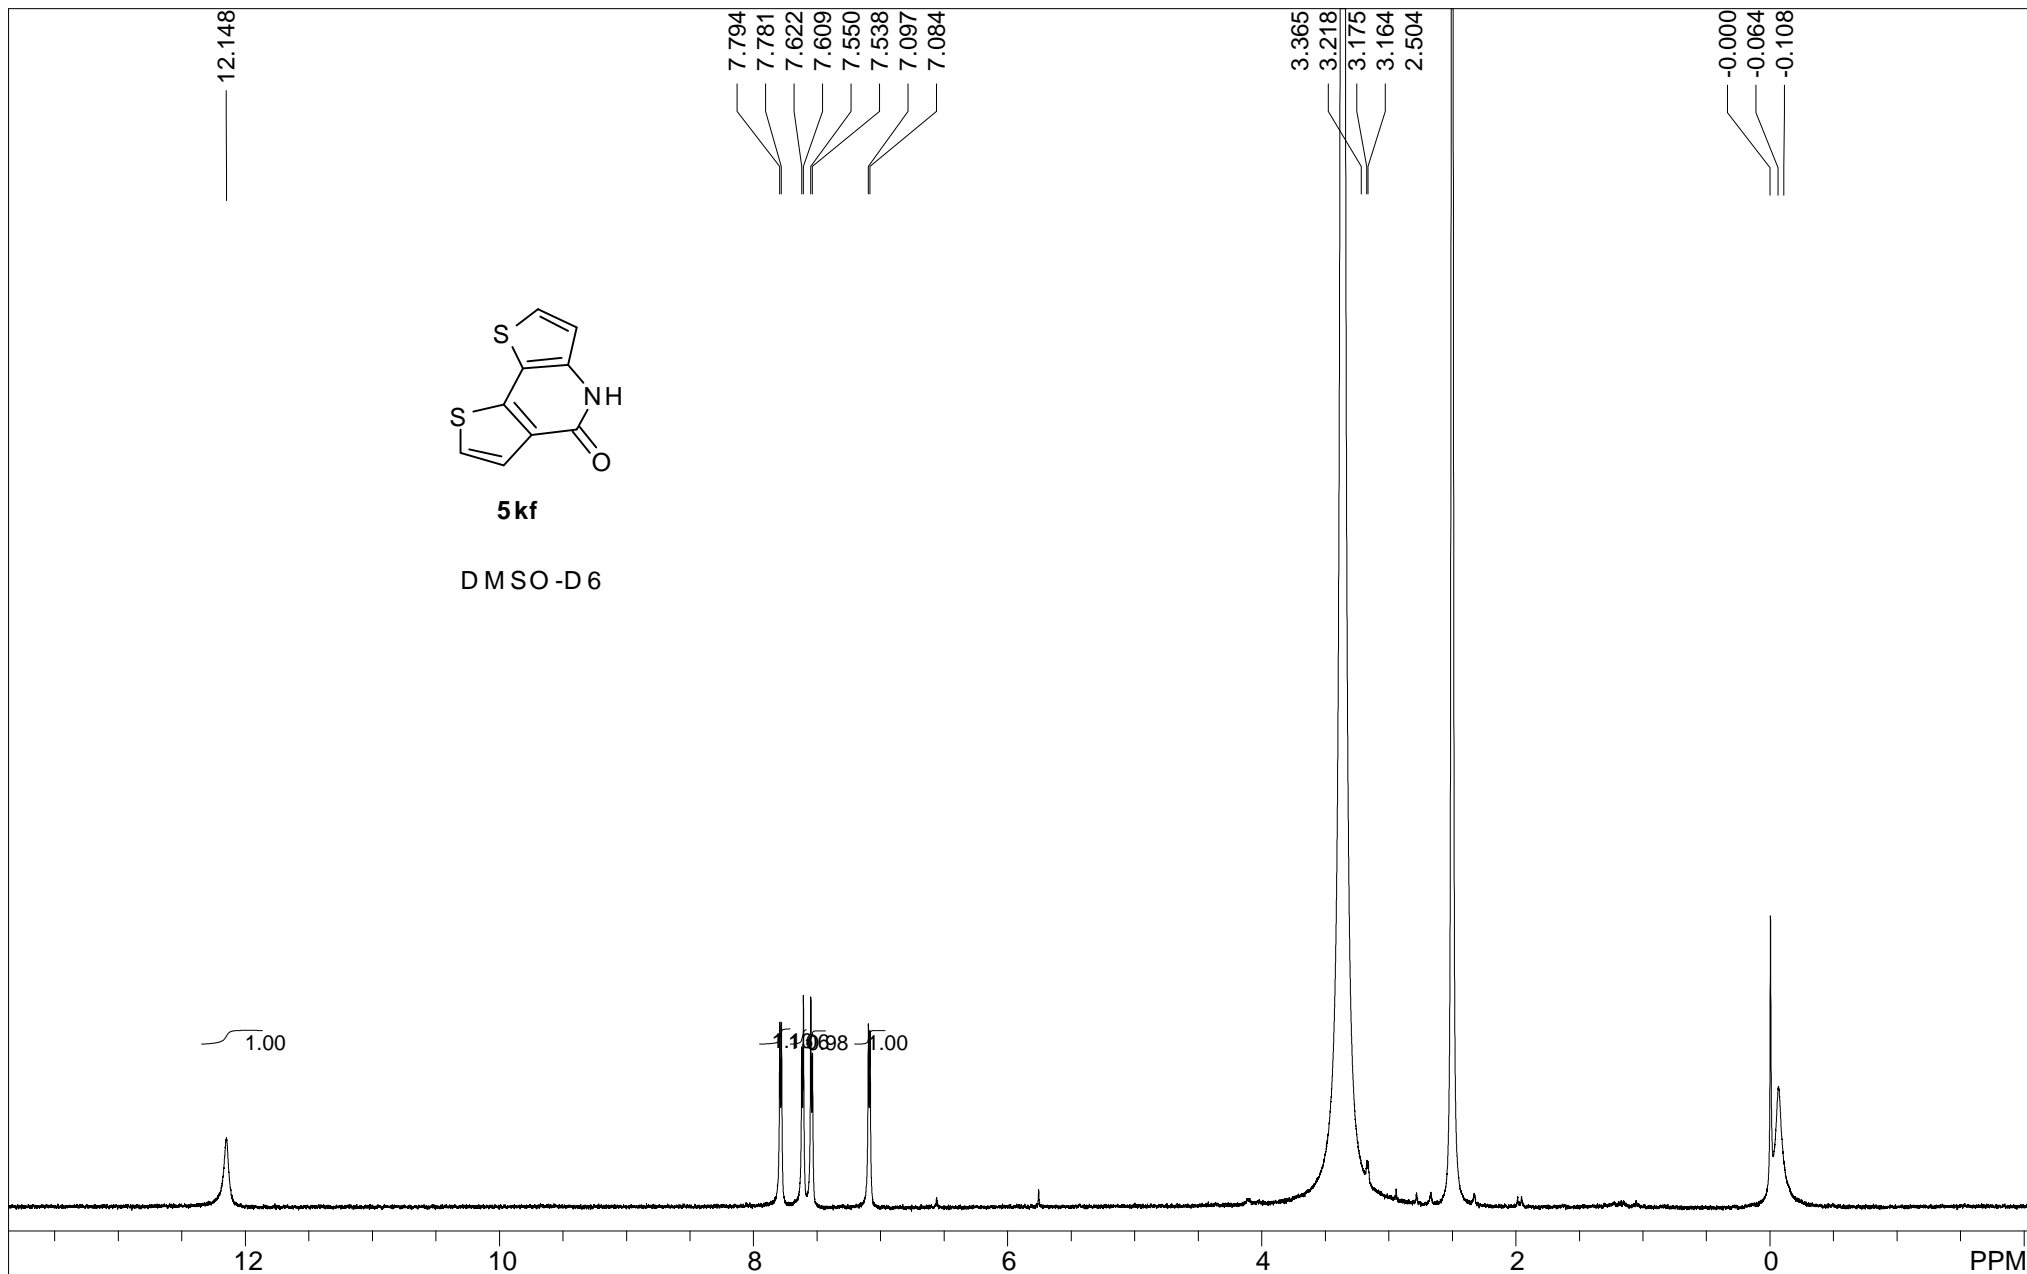

USER: fx -- DATE: 2017-05-31 12:03:36.364

|             |             |             |             |                                                            |
|-------------|-------------|-------------|-------------|------------------------------------------------------------|
| F1: 400.160 | F2: 1.000   | SW1: 8224   | OF1: 3199.9 | PTS1d: 65536                                               |
| EX: zg30    | PW: 12.8 us | PD: 1.0 sec | NA: 16      | LB: 0.3 Nuts - \$sp-0011167-5kf-H1-DMSO-20170531-CT54 10.1 |

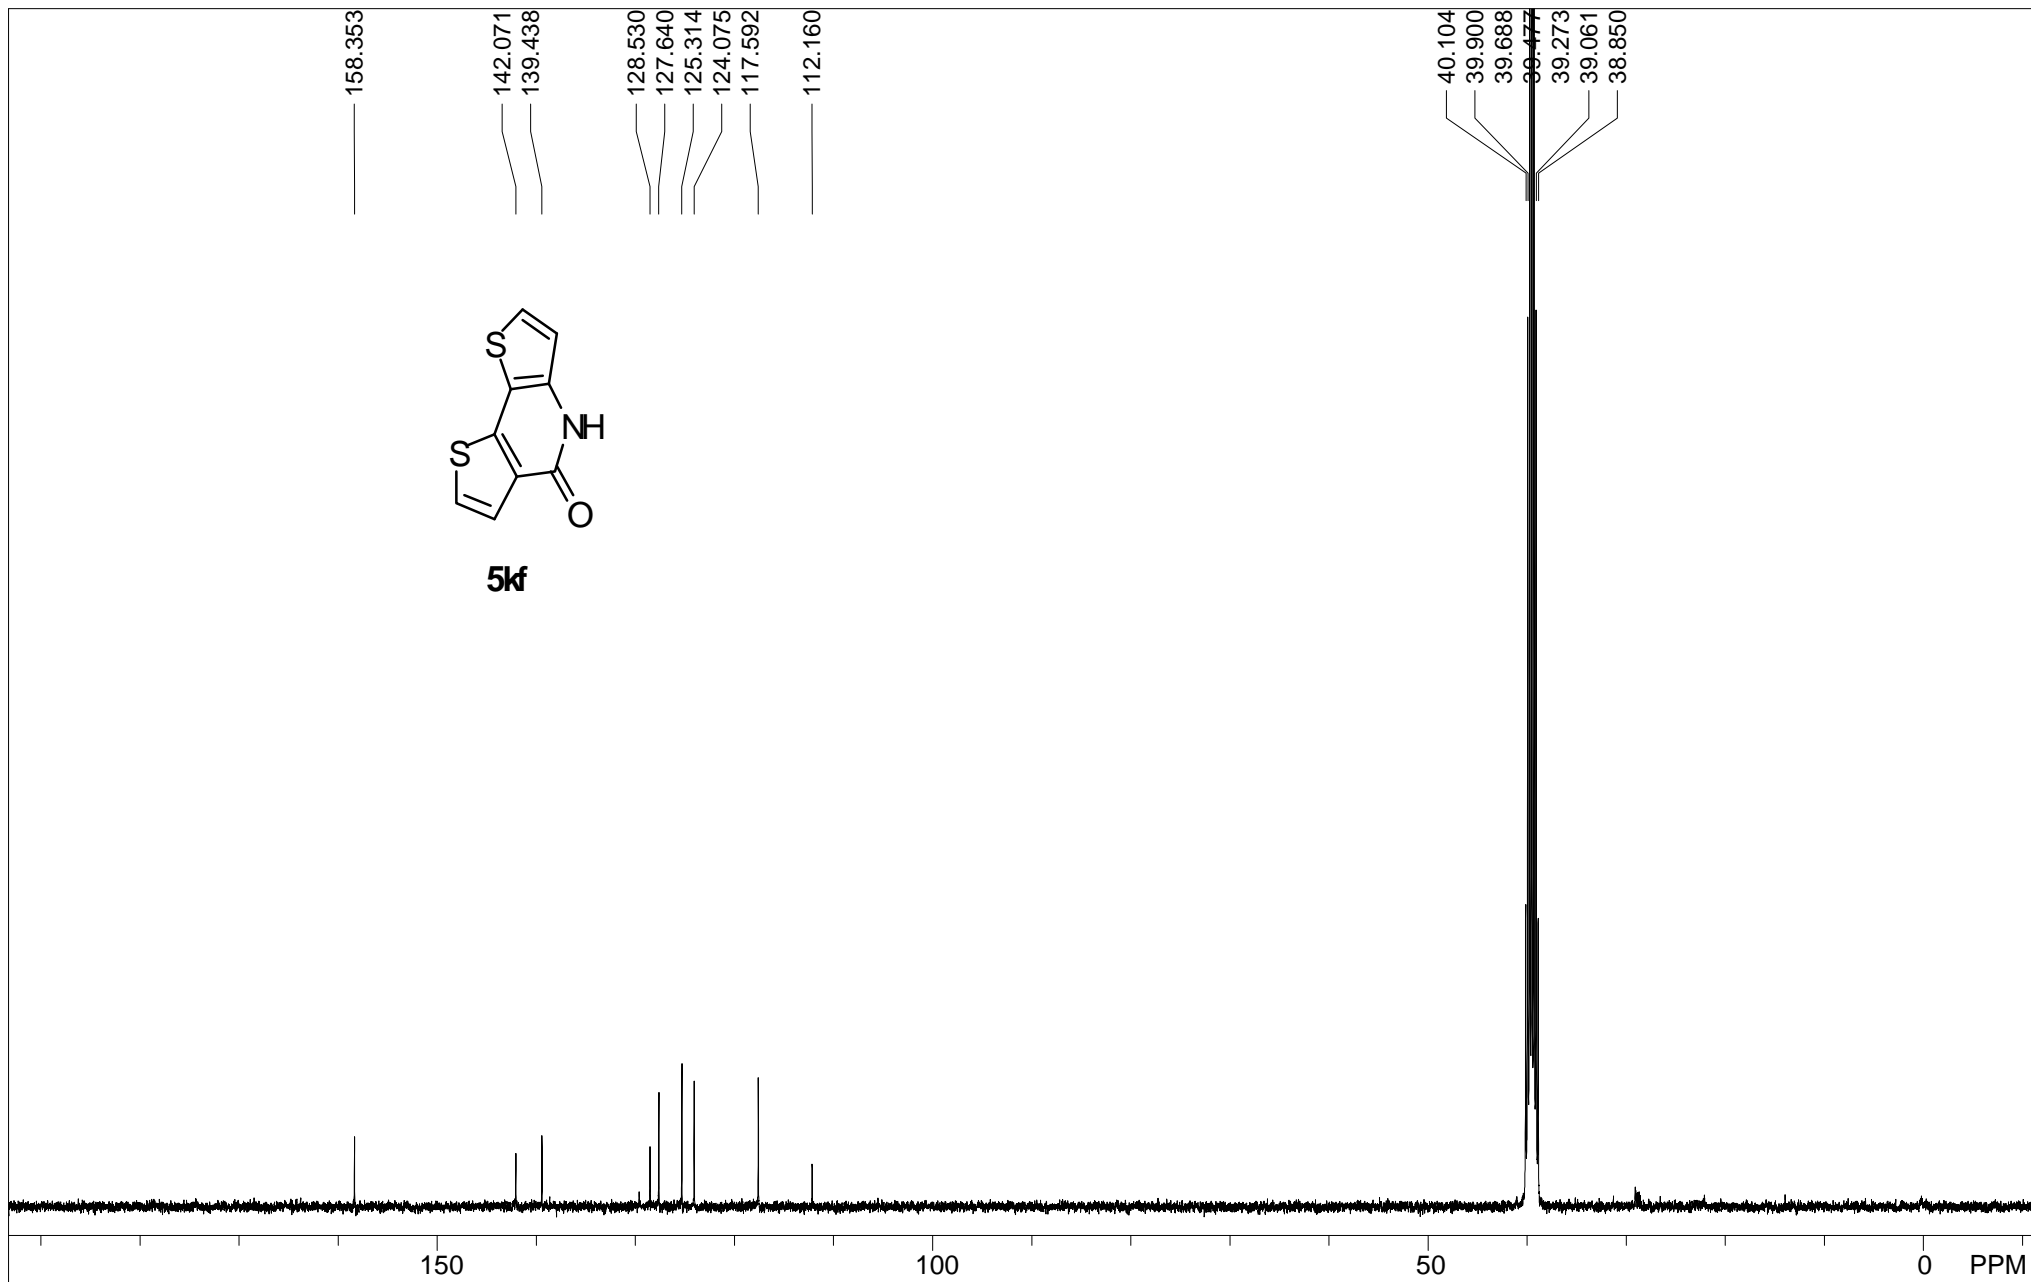

USER: fx -- DATE: 2017-06-02 23:30:55.292

|             |            |             |              |                                                             |
|-------------|------------|-------------|--------------|-------------------------------------------------------------|
| F1: 100.620 | F2: 1.000  | SW1: 24038  | OF1: 10011.3 | PTS1d: 32768                                                |
| EX: zpgg30  | PW: 9.0 us | PD: 2.0 sec | NA: 1024     | LB: 1.0 Nuts - \$SP-0011167-5kf-C13-DMSO-20170602-CT54 10.1 |

10.912

7.877  
7.865  
7.855  
7.655  
7.645  
7.633  
7.285  
7.265  
7.246

3.331

2.505

1.240

-0.000

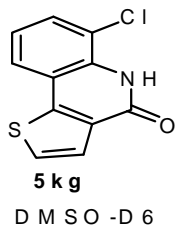

0.95

1.91  
1.88  
1.00

10

8

6

4

2

0

PPM

USER: fx -- DATE: 2017-05-24 12:11:54.260

F1: 400.160

F2: 1.000

SW1: 8224

OF1: 3199.4

PTS1d: 65536

EX: zg30

PW: 12.8 us

PD: 1.0 sec

NA: 16

LB: 0.3 Nuts - \$SP-0011167-5KG-H1-DMSO-20170524-CT54 10.1

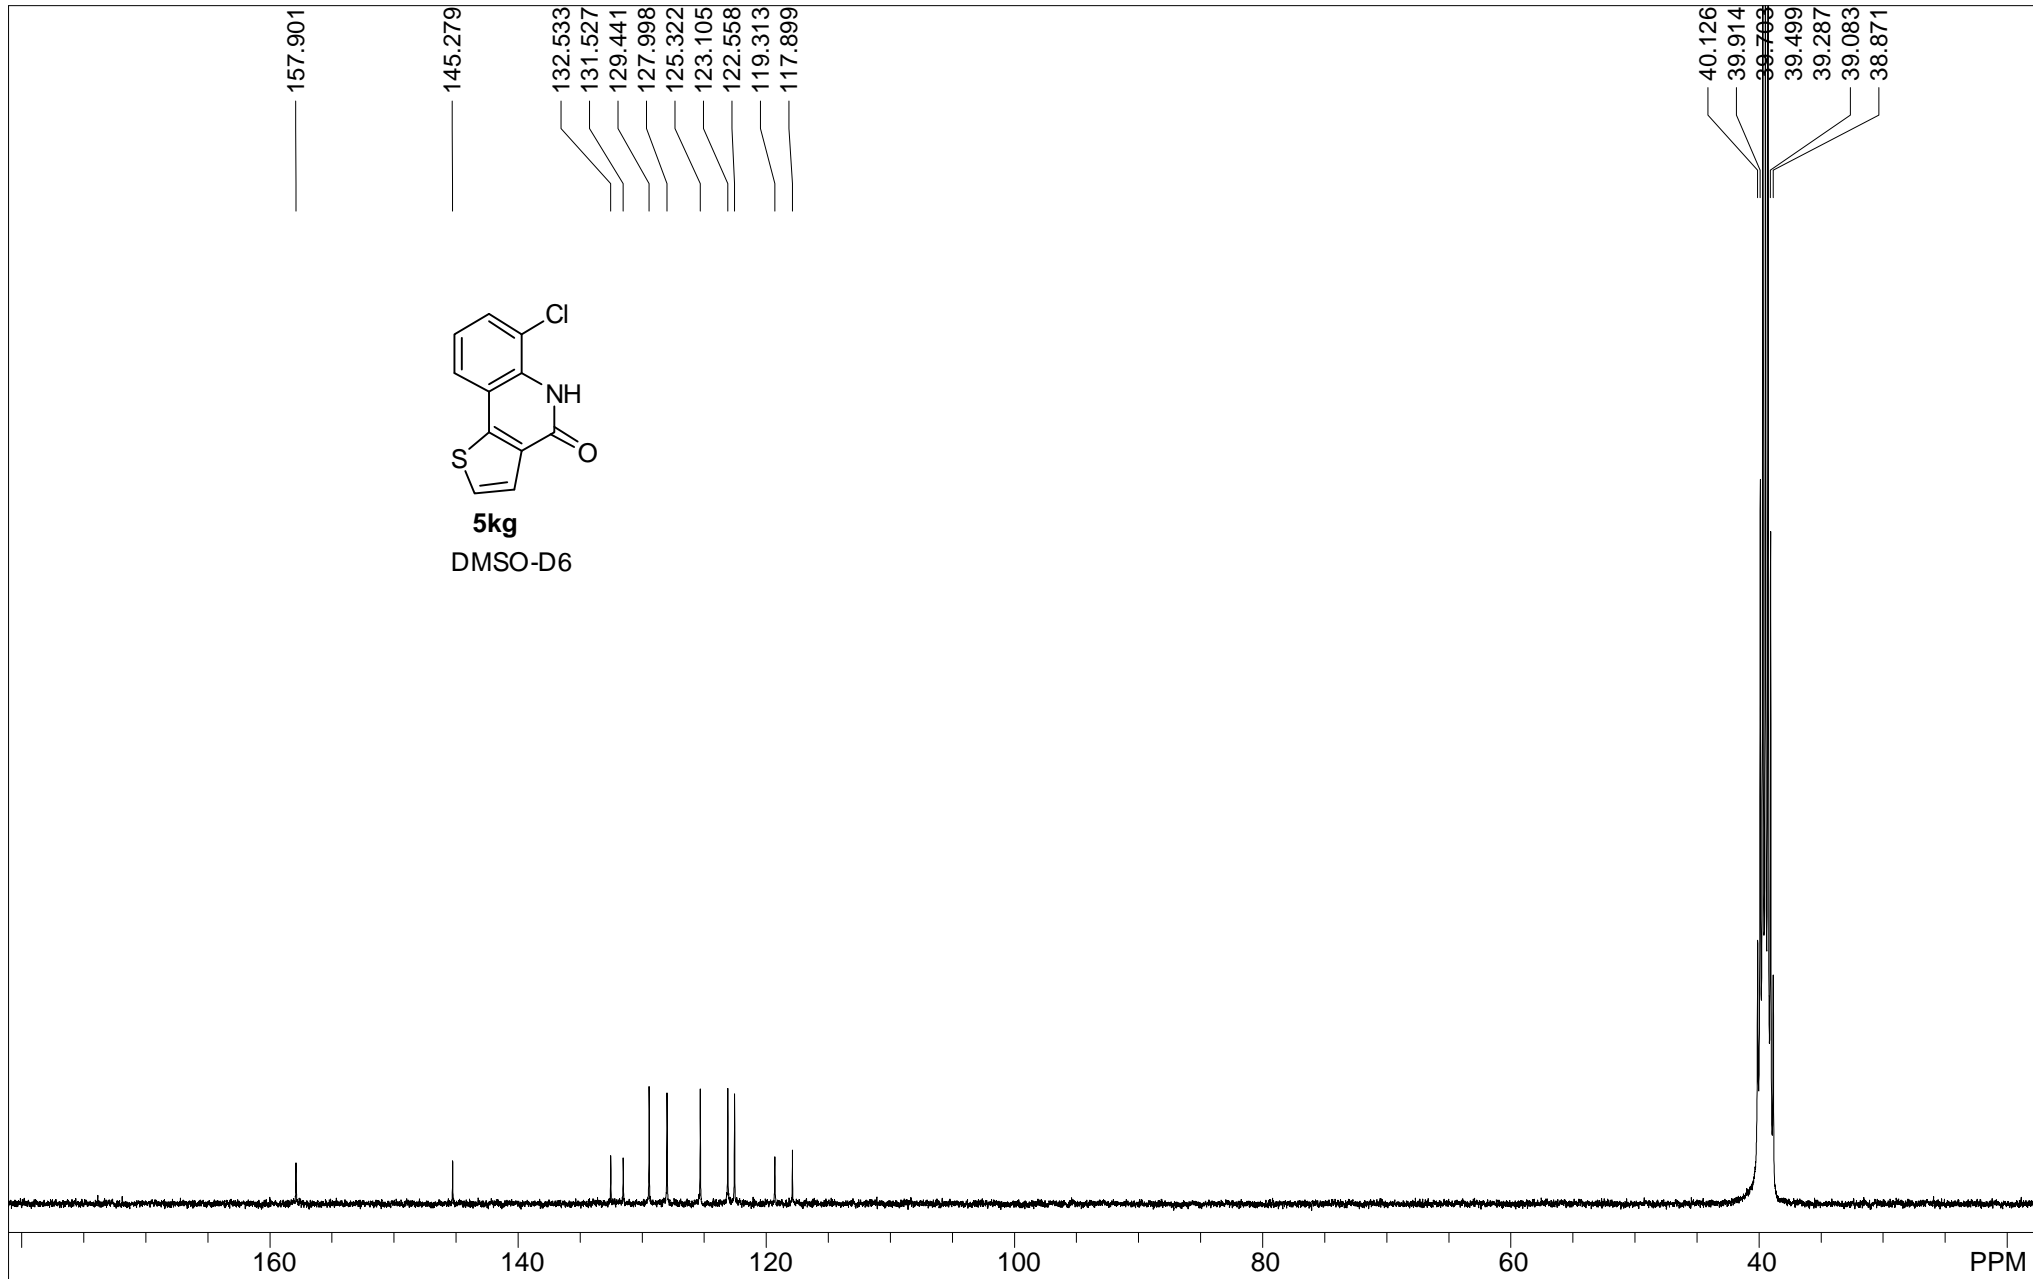

USER: fx -- DATE: 2017-05-26 02:25:40.231

|             |            |             |              |                                                             |
|-------------|------------|-------------|--------------|-------------------------------------------------------------|
| F1: 100.620 | F2: 1.000  | SW1: 24038  | OF1: 10011.3 | PTS1d: 32768                                                |
| EX: zpgp30  | PW: 9.0 us | PD: 2.0 sec | NA: 1024     | LB: 1.0 Nuts - \$SP-0011167-5KG-C13-DMSO-20170525-CT54 10.1 |

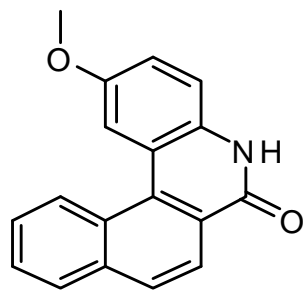

**5b**  
DMSO-D6

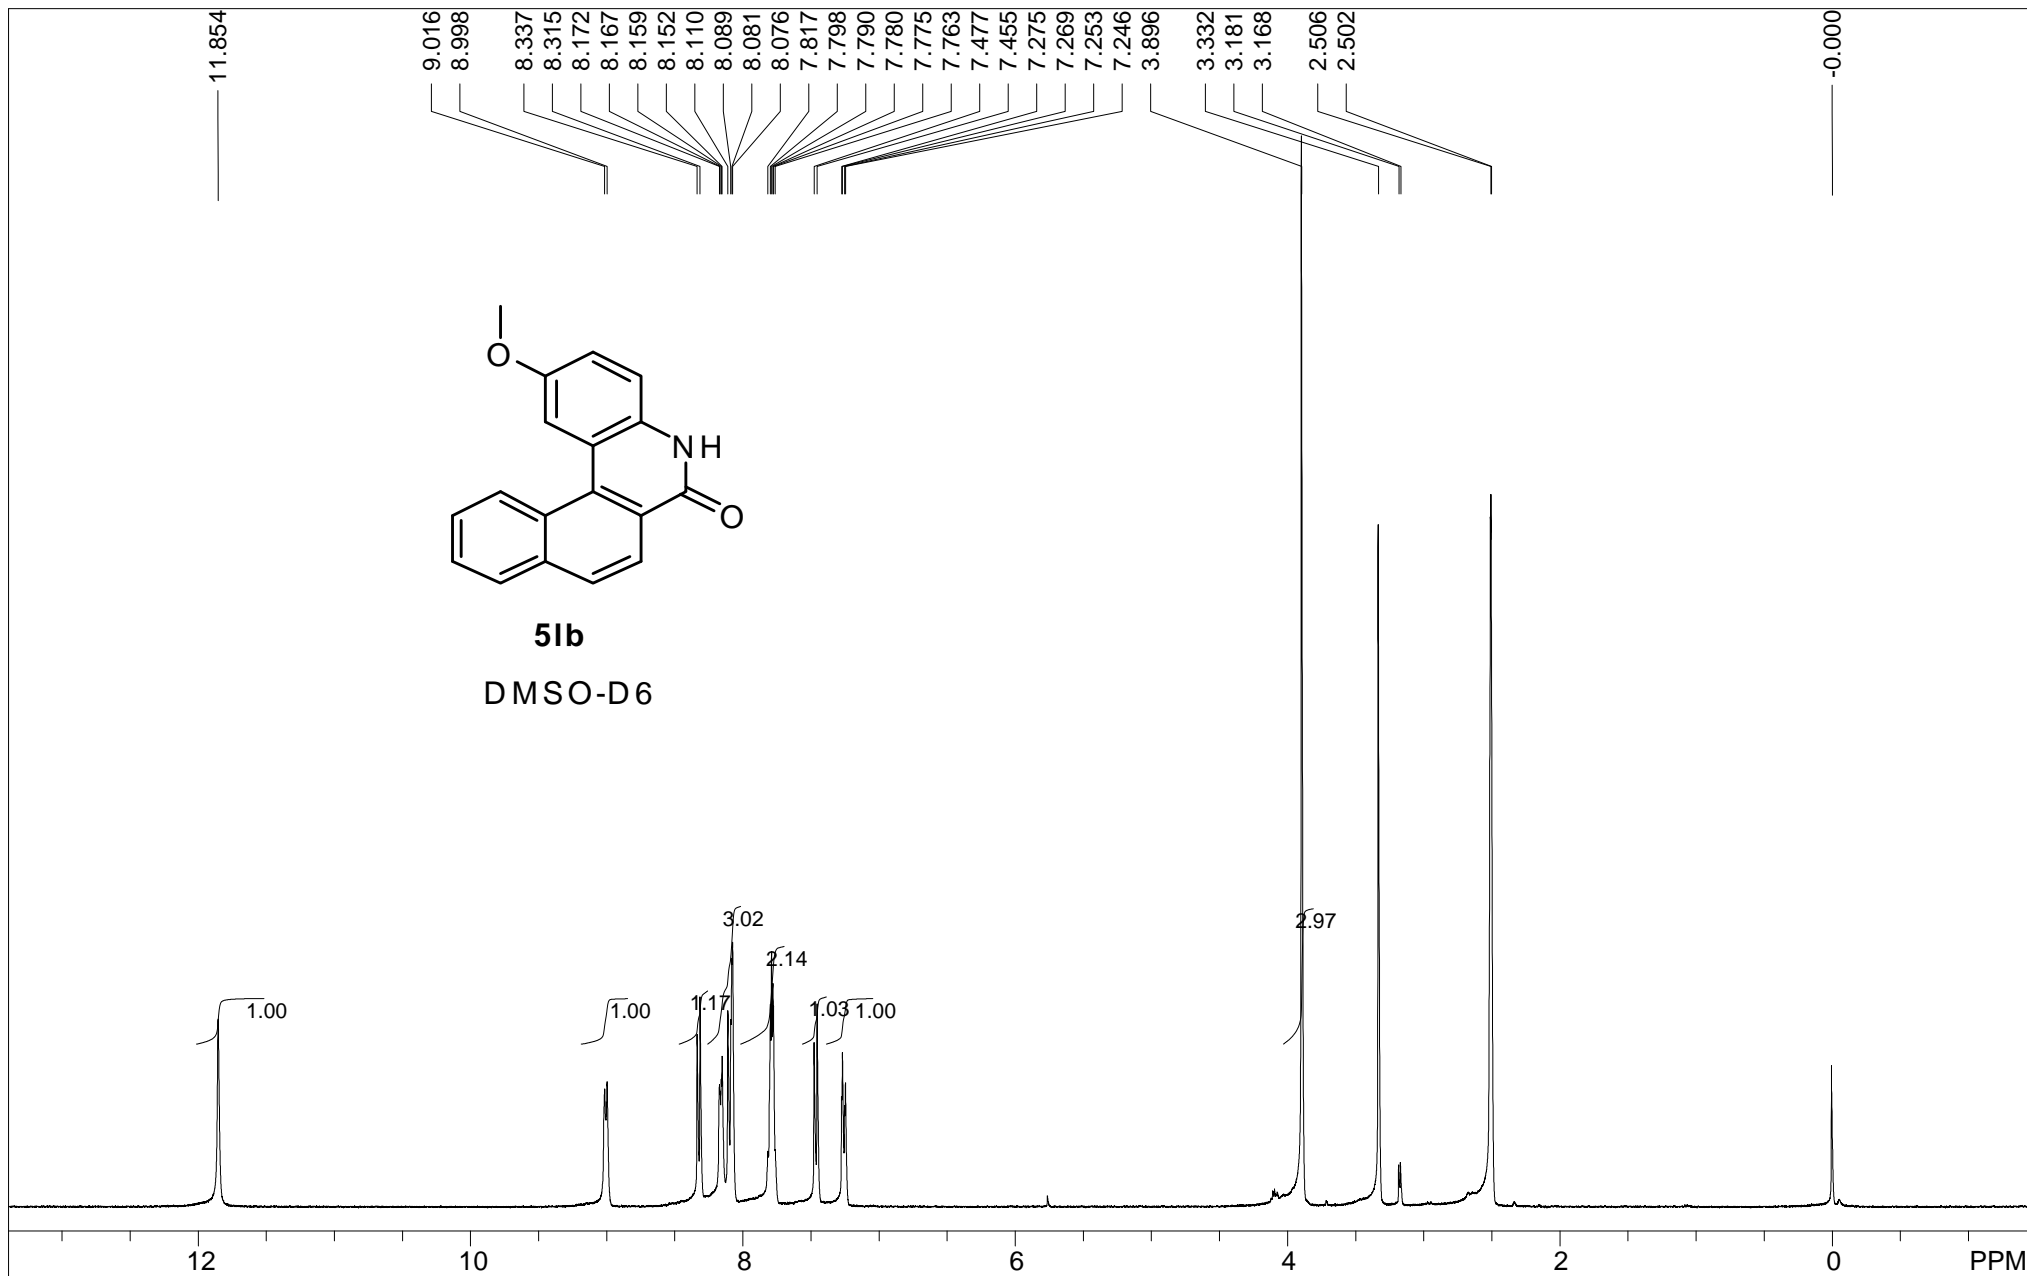

|                                           |           |             |             |             |         |                          |
|-------------------------------------------|-----------|-------------|-------------|-------------|---------|--------------------------|
| USER: fx -- DATE: 2017-06-06 10:27:05.525 |           |             |             |             |         |                          |
| F1: 400.160                               | F2: 1.000 | SW1: 8224   | PD: 1.0 sec | OF1: 3198.5 | LB: 0.3 | PTS1d: 65536             |
| EX: zg30                                  |           | PW: 12.8 us |             | NA: 16      |         | Nuts - \$5b-H1-DMSO 10.1 |



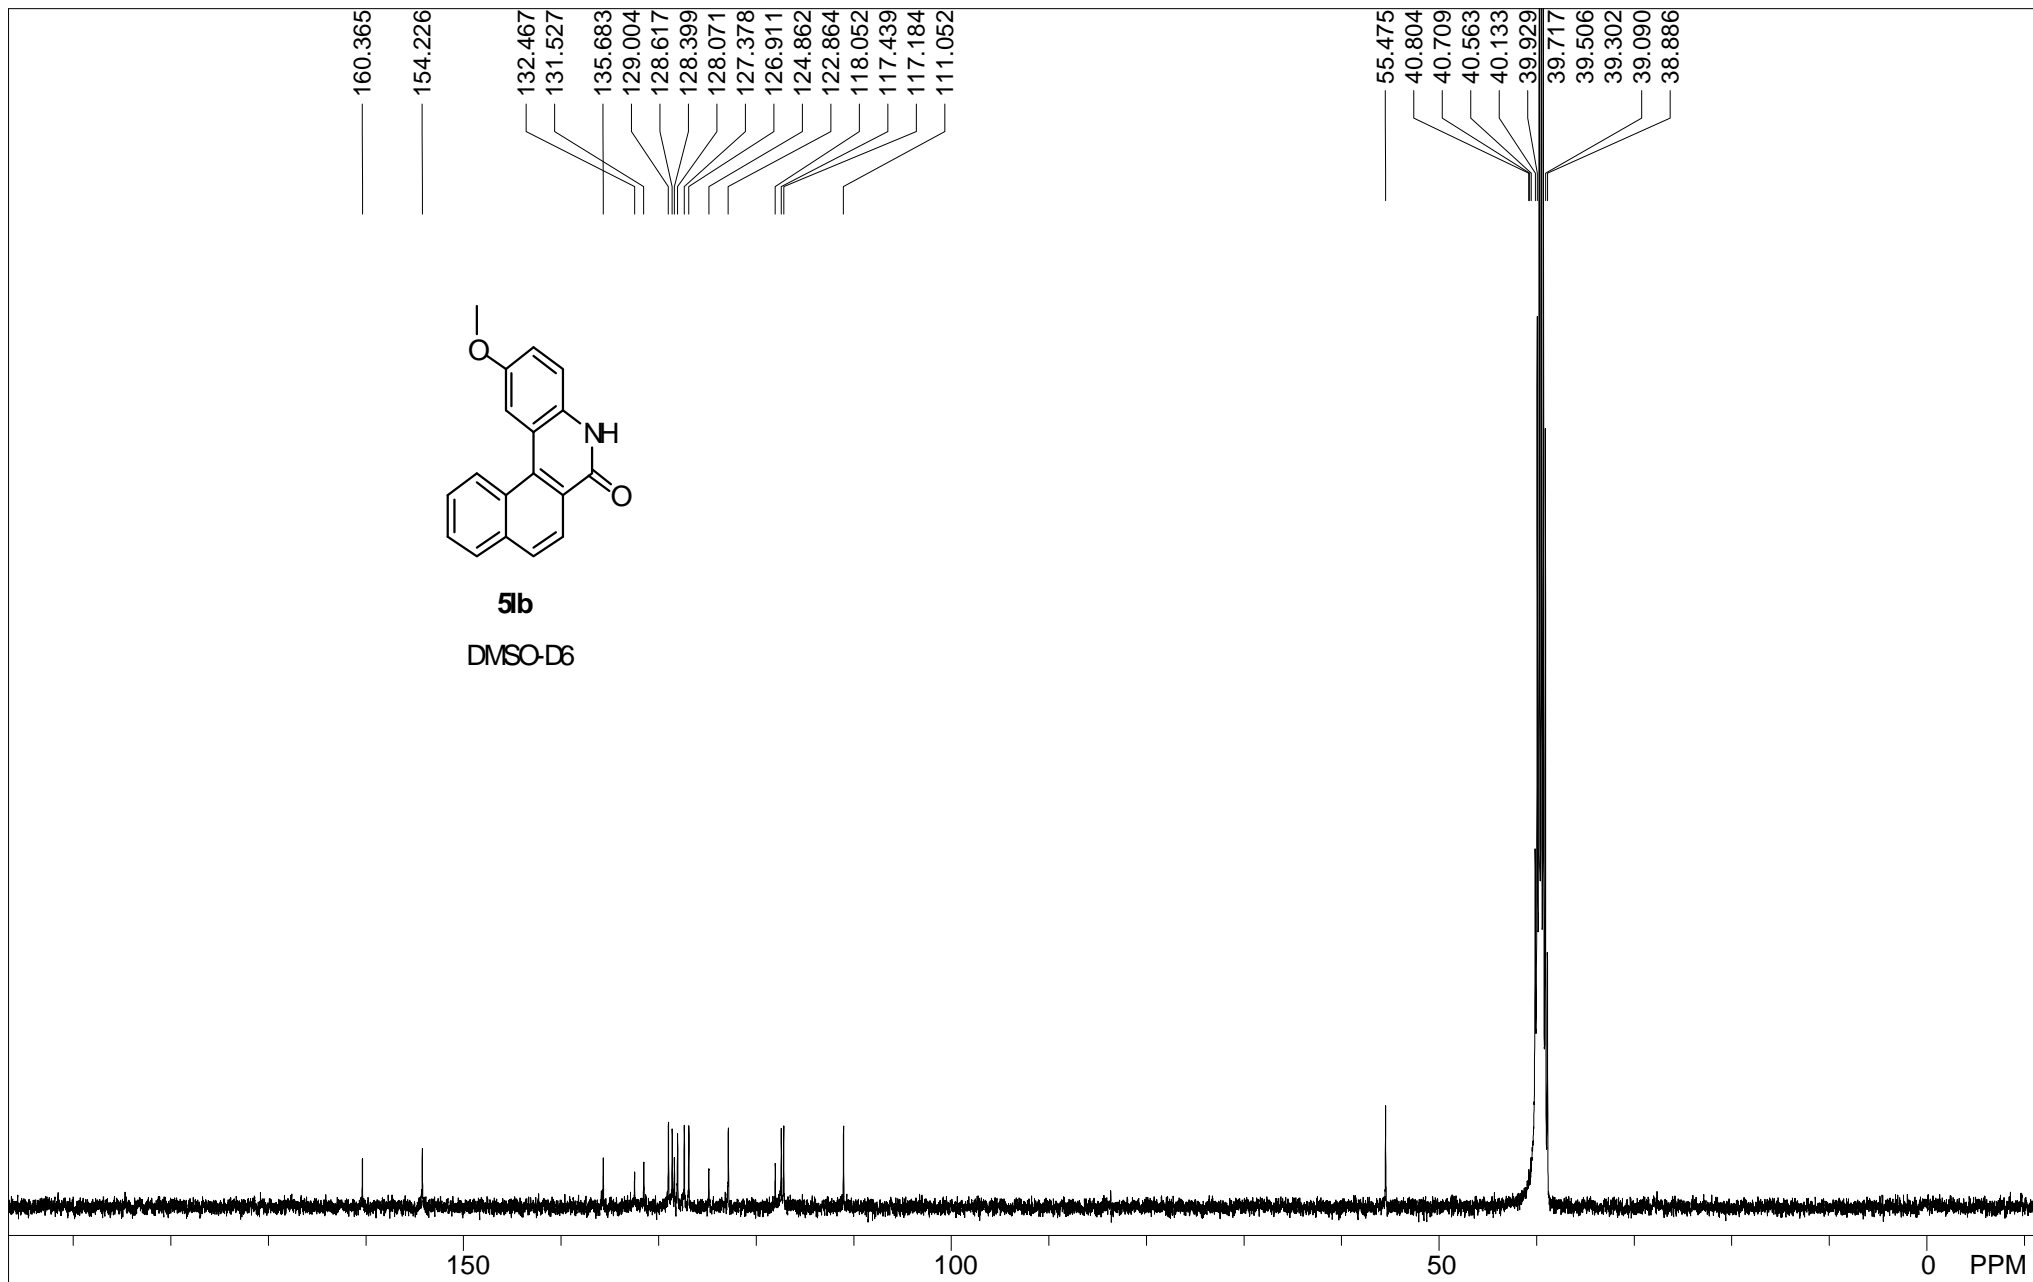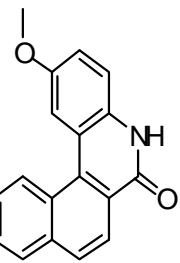

**5b**

DMSO-D6

USER: fx -- DATE: 2017-06-08 00:53:56.935

|             |            |             |              |                                                             |
|-------------|------------|-------------|--------------|-------------------------------------------------------------|
| F1: 100.620 | F2: 1.000  | SW1: 24038  | OF1: 10011.3 | PTS1d: 32768                                                |
| EX: zgpg30  | PW: 9.0 us | PD: 2.0 sec | NA: 1024     | LB: 1.0 Nuts - \$SP-0011167-51b-C13-DMSO-20170607-CT54 10.1 |

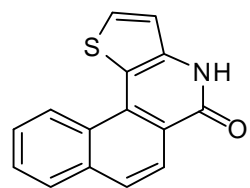

5lf

DMSO-D6

8.904  
8.883  
8.401  
8.379  
8.175  
8.156  
8.043  
8.035  
8.014  
7.914  
7.896  
7.877  
7.845  
7.826  
7.808  
7.262  
7.248

3.357

2.510

1.219

-0.000

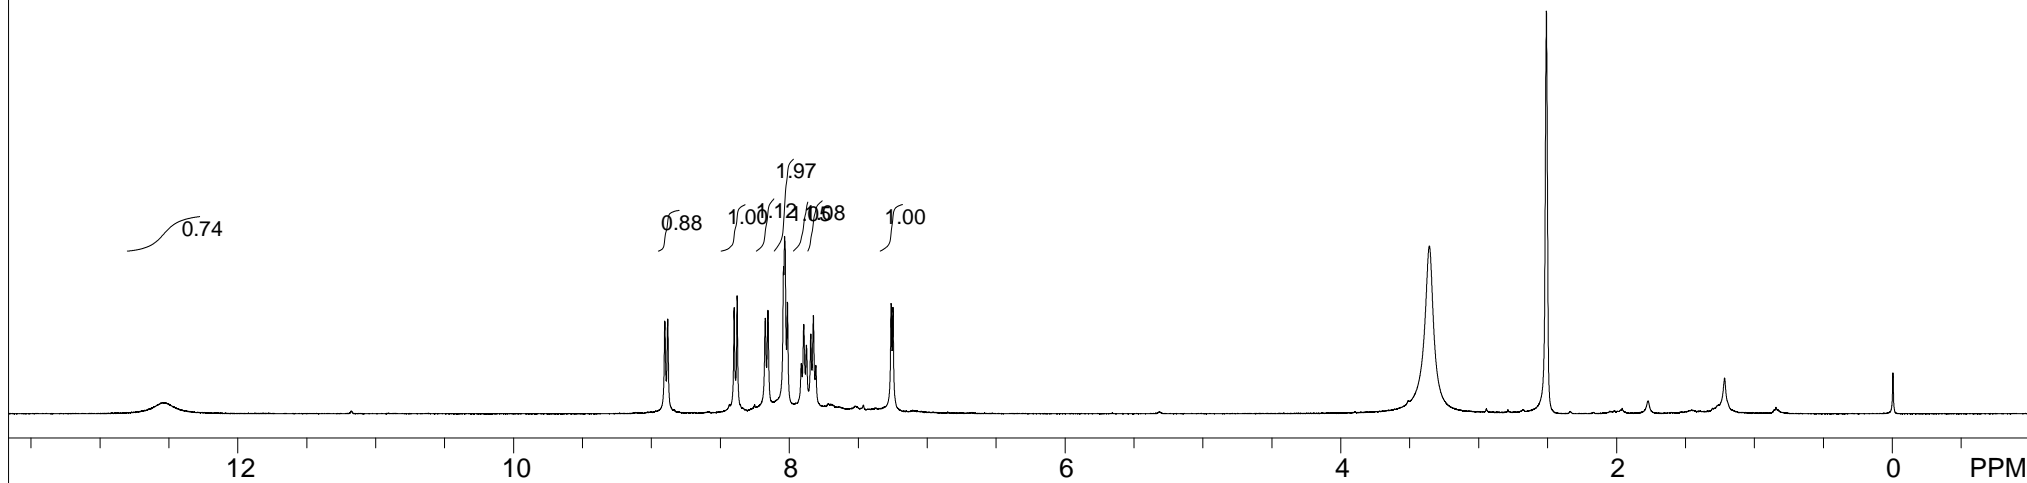

USER: fx -- DATE: 2017-06-12 11:38:57.634

|             |             |             |             |                                                           |
|-------------|-------------|-------------|-------------|-----------------------------------------------------------|
| F1: 400.160 | F2: 1.000   | SW1: 8224   | OF1: 3201.5 | PTS1d: 65536                                              |
| EX: zg30    | PW: 12.8 us | PD: 1.0 sec | NA: 16      | LB: 0.3 Nuts - \$P-0011167-5LF-H1-DMSO-20170612-CT54 10.1 |

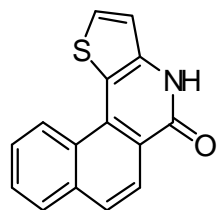

5f

DMSO-D6

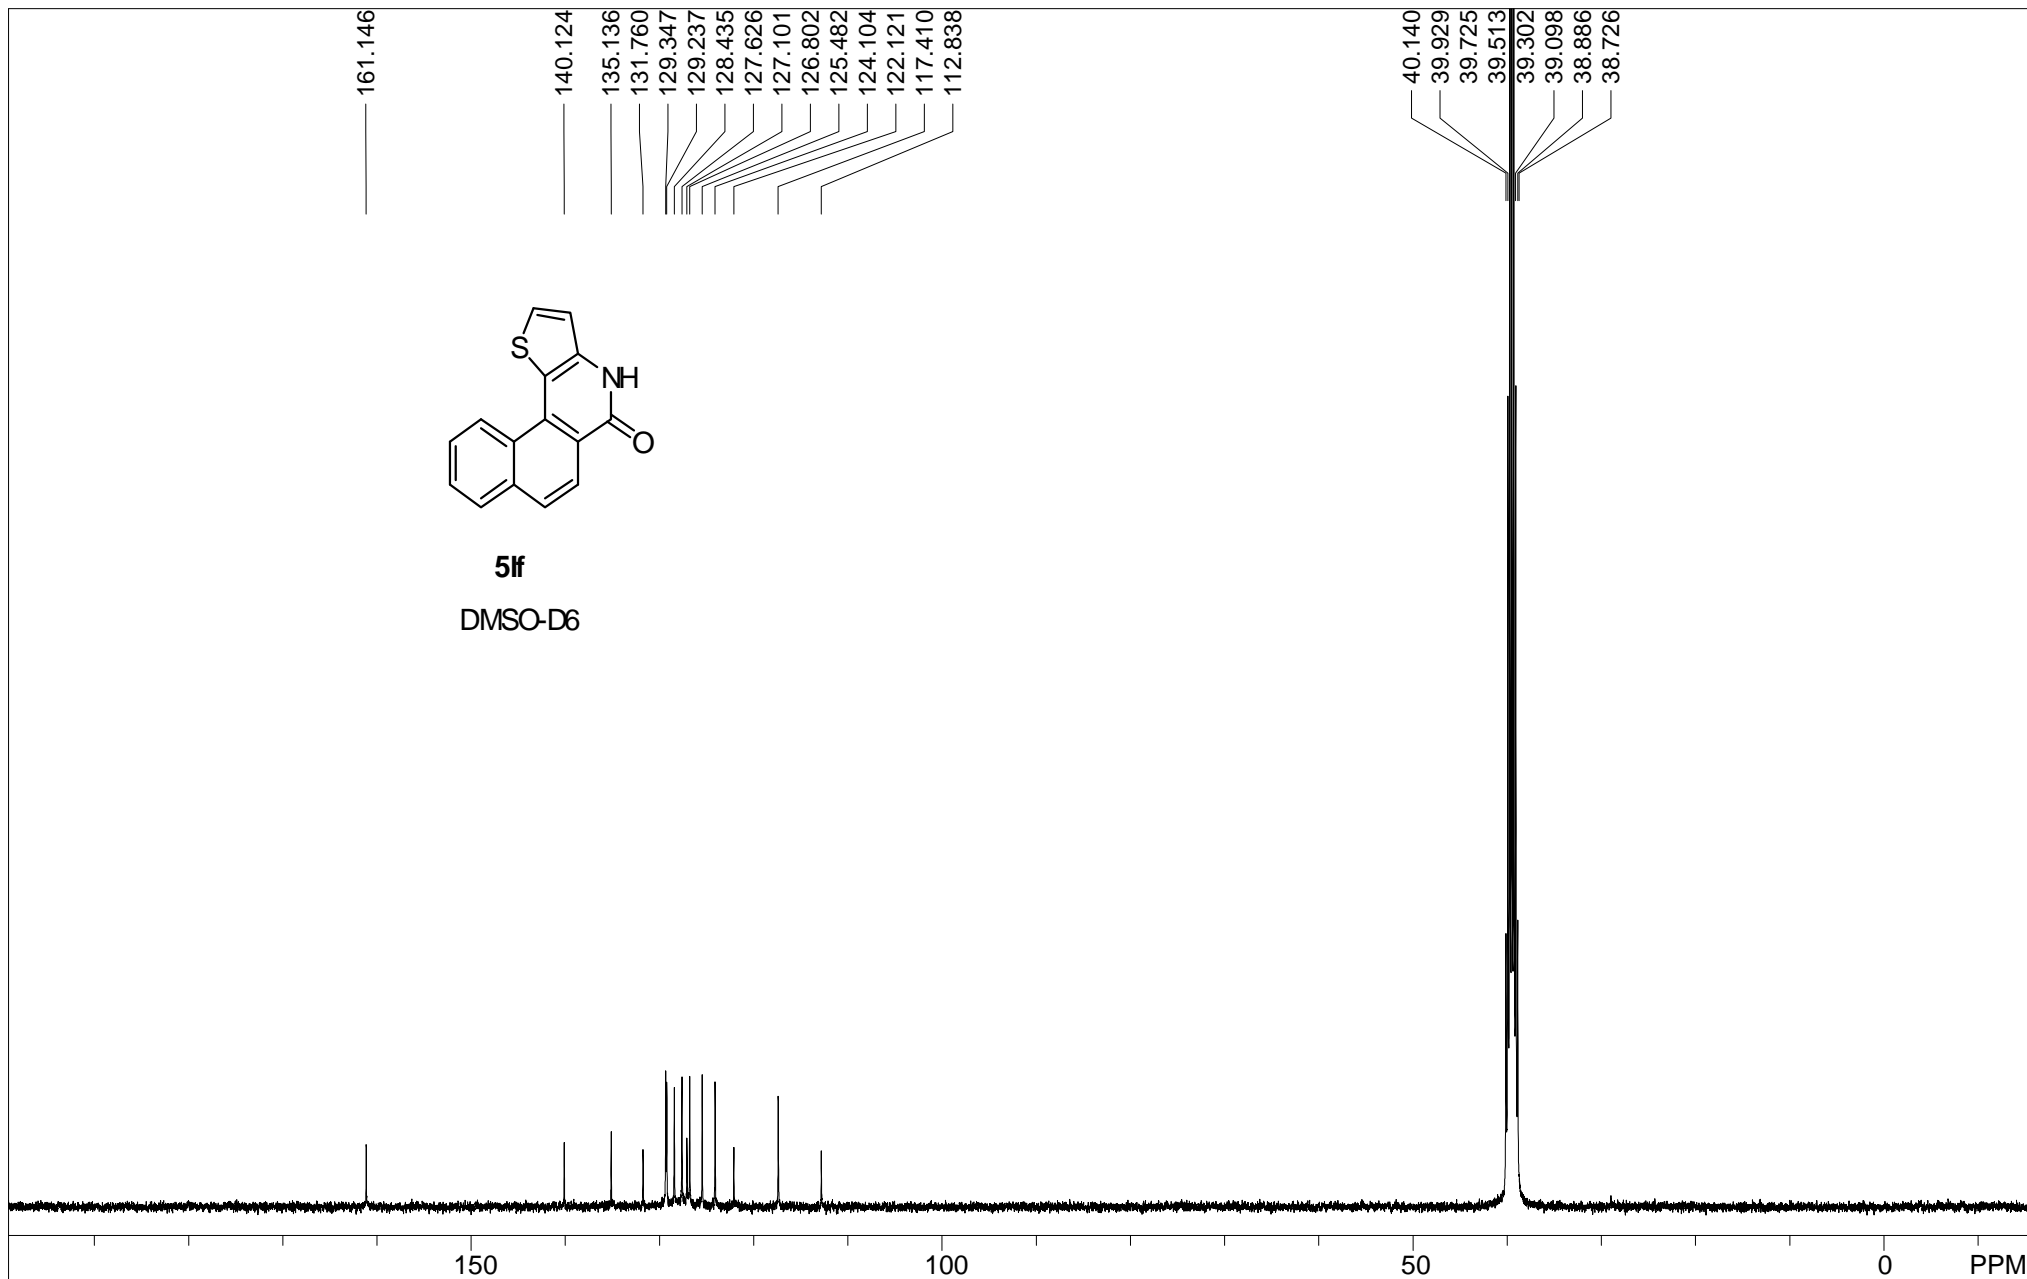

USER: fx -- DATE: 2017-06-12 22:21:16.037

|             |            |             |              |                                                            |
|-------------|------------|-------------|--------------|------------------------------------------------------------|
| F1: 100.620 | F2: 1.000  | SW1: 24038  | OF1: 10011.3 | PTS1d: 32768                                               |
| EX: zgpg30  | PW: 9.0 us | PD: 2.0 sec | NA: 1024     | LB: 1.0 Nuts - \$SP-0011167-5f-C13-DMSO-20170612-CT54 20.1 |

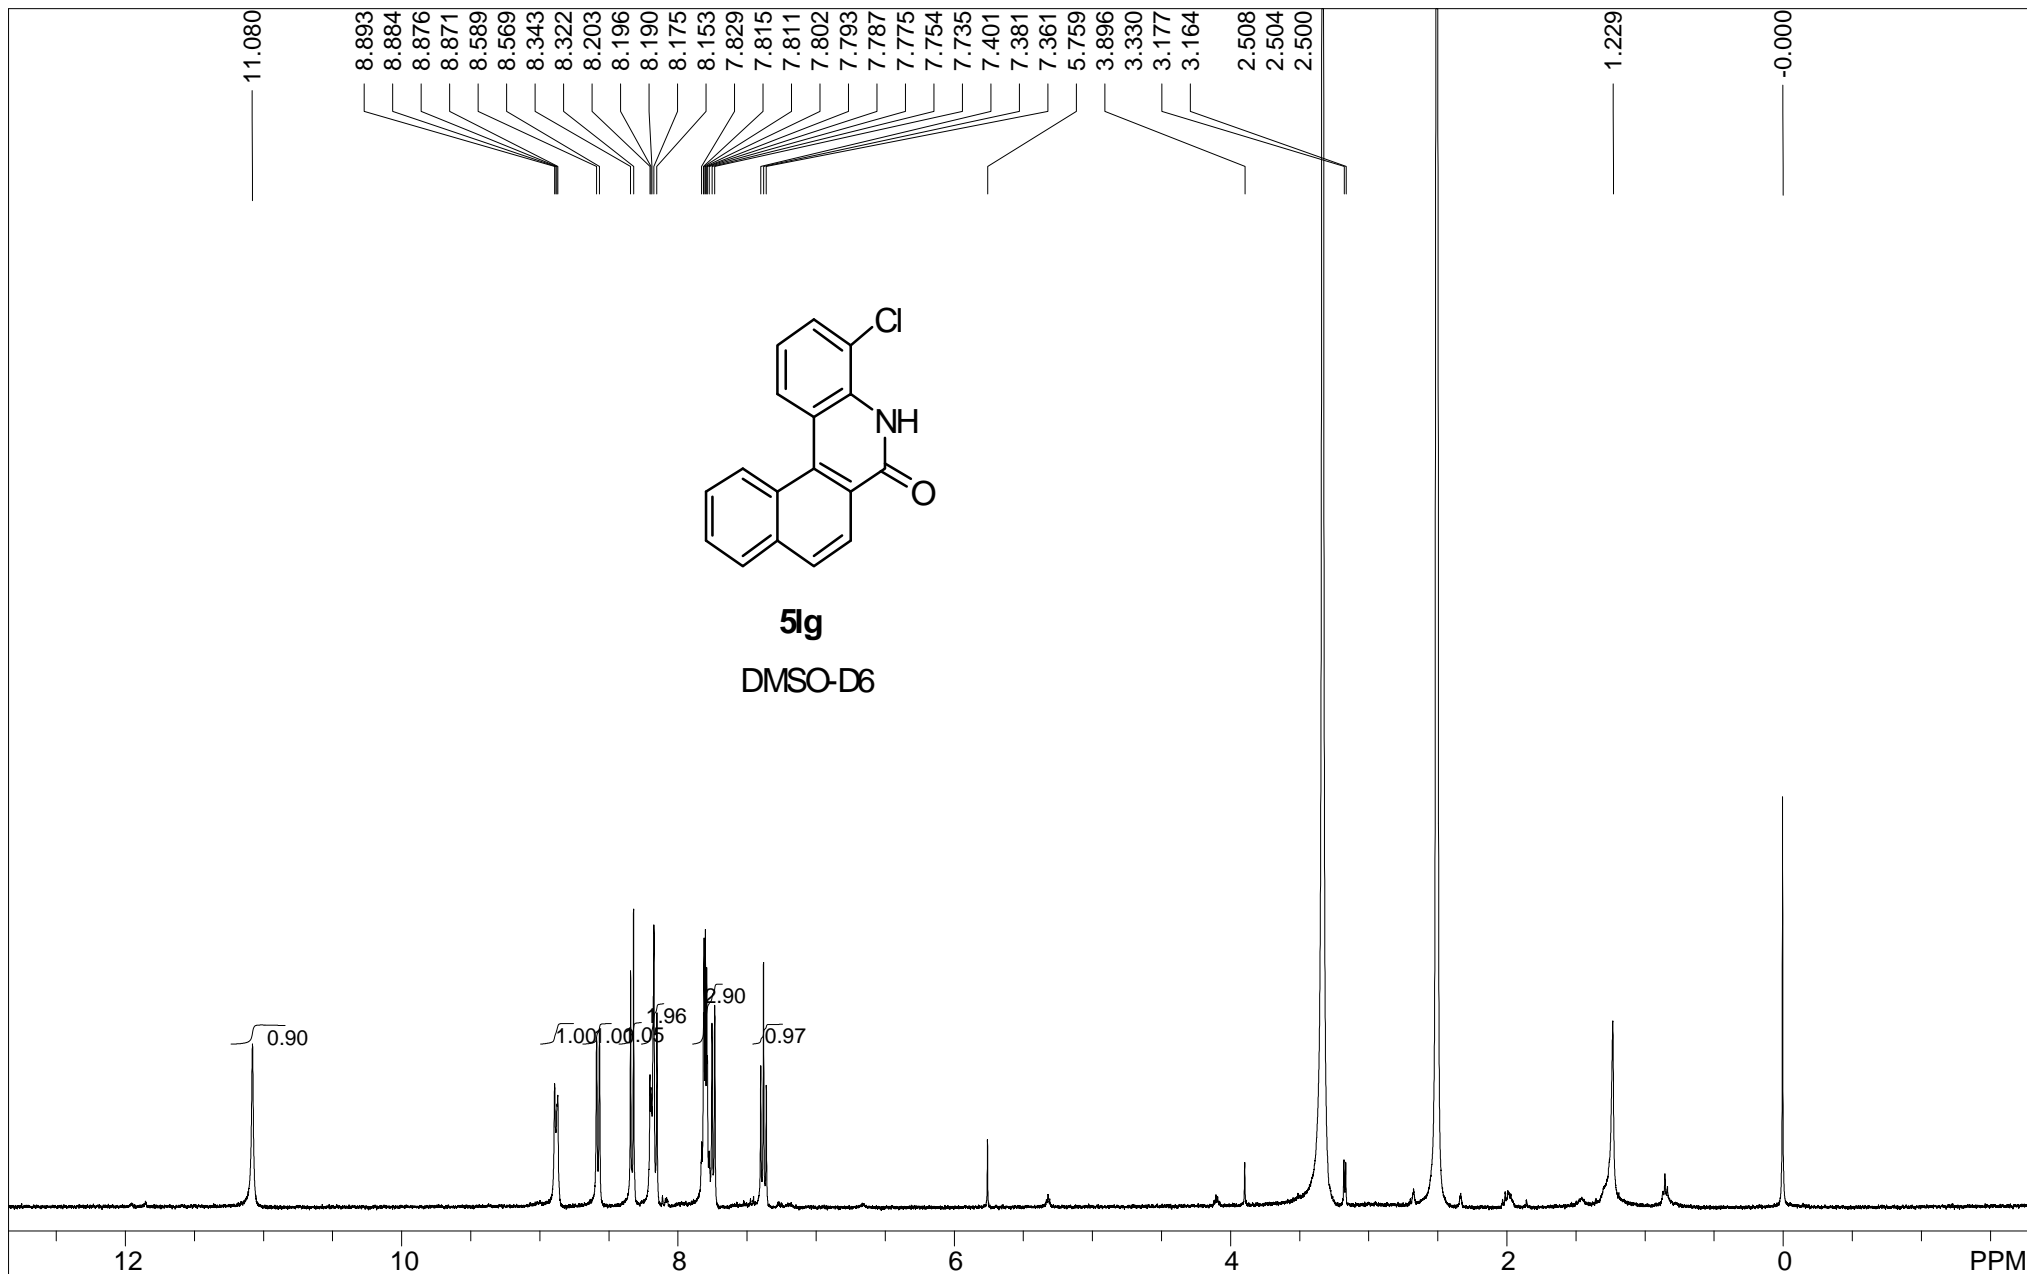

USER: fx -- DATE: 2017-06-09 14:18:41.741

|             |             |             |             |                           |
|-------------|-------------|-------------|-------------|---------------------------|
| F1: 400.160 | F2: 1.000   | SW1: 8224   | OF1: 3199.1 | PTS1d: 65536              |
| EX: zg30    | PW: 12.8 us | PD: 1.0 sec | NA: 16      | LB: 0.3                   |
|             |             |             |             | Nuts - \$51g-H1-DMSO 10.1 |

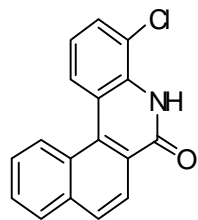

**5g**  
DMSO-D6

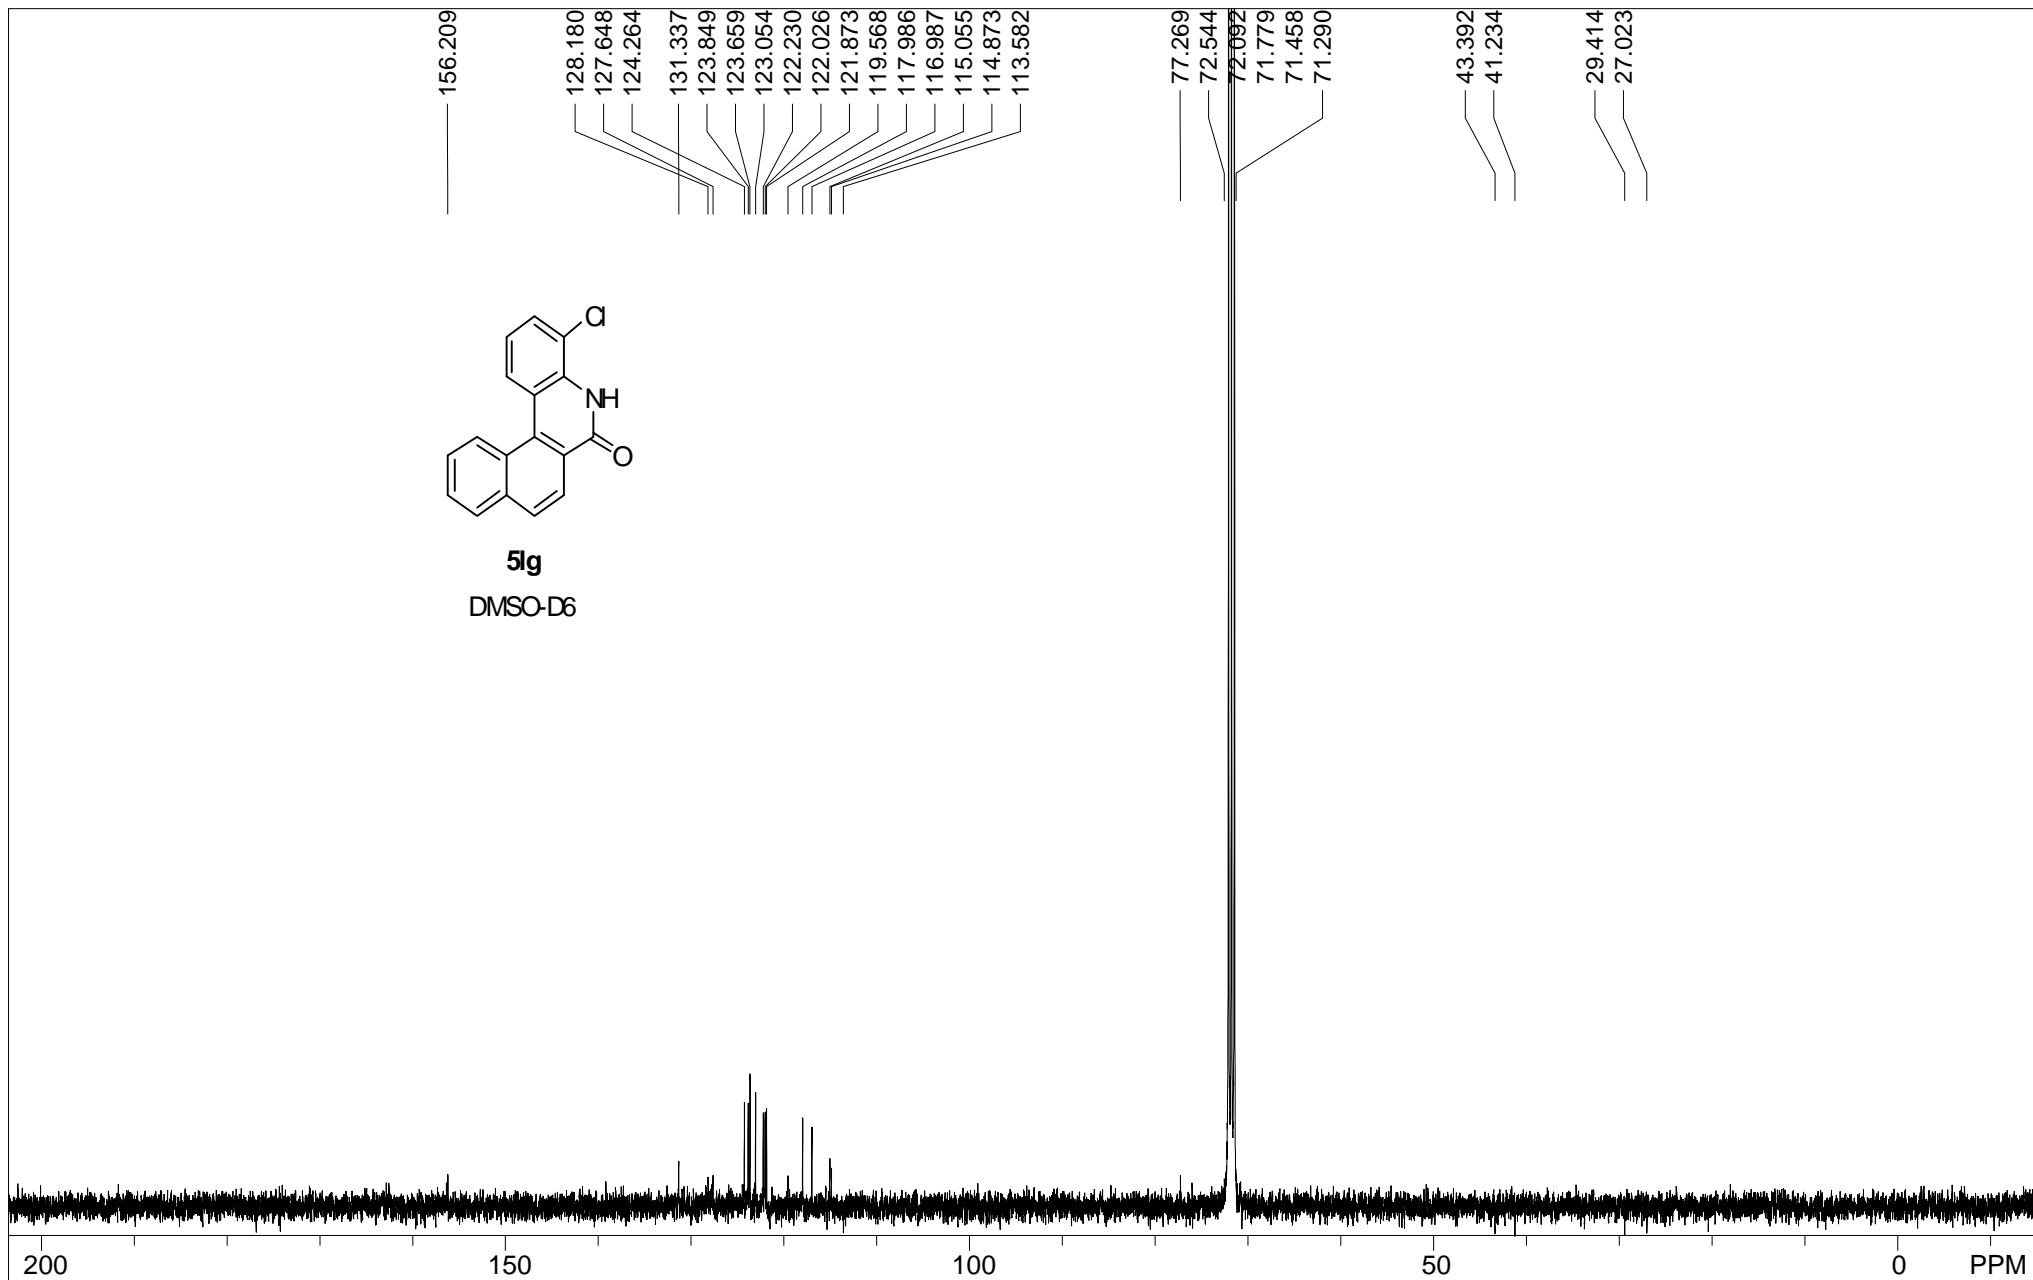

USER: fx -- DATE: 2017-06-12 23:24:07.297

|             |            |             |              |                                                             |
|-------------|------------|-------------|--------------|-------------------------------------------------------------|
| F1: 100.620 | F2: 1.000  | SW1: 24038  | OF1: 10011.3 | PTS1d: 32768                                                |
| EX: zgpg30  | PW: 9.0 us | PD: 2.0 sec | NA: 1024     | LB: 1.0 Nuts - \$P-0011167-5lg-C13-CDC13-20170612-CT54 10.1 |

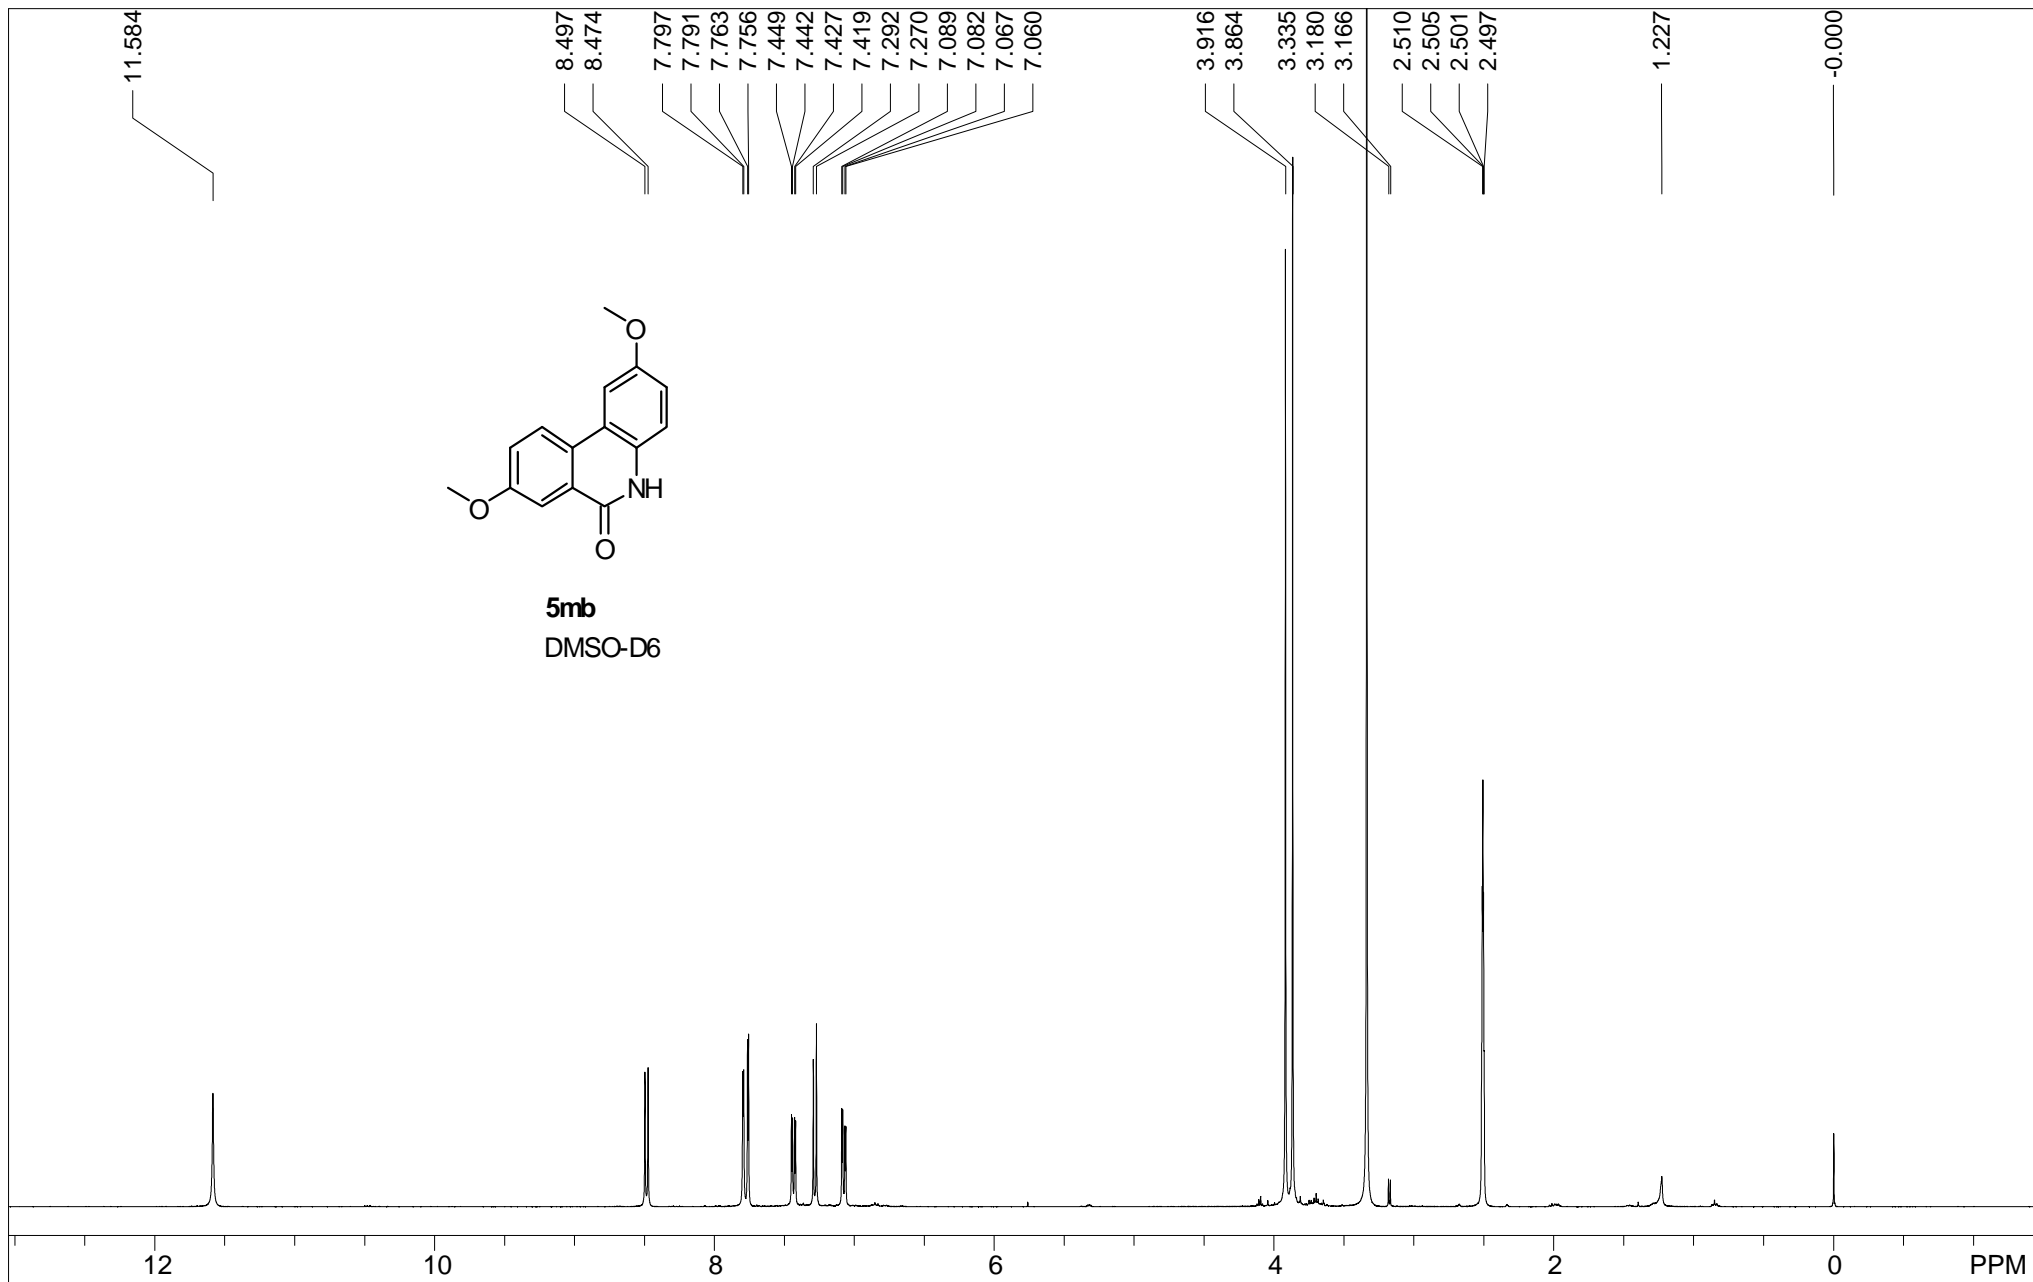

USER: fx -- DATE: 2017-06-13 13:19:03.617

|             |             |             |             |                           |
|-------------|-------------|-------------|-------------|---------------------------|
| F1: 400.160 | F2: 1.000   | SW1: 8224   | OF1: 3199.9 | PTS1d: 65536              |
| EX: zg30    | PW: 12.8 us | PD: 1.0 sec | NA: 16      | LB: 0.3                   |
|             |             |             |             | Nuts - \$5mb-H1-DMSO 10.1 |

160.059  
159.038  
154.846

129.595  
127.480  
127.298  
124.913  
121.333  
118.482  
117.118  
116.491  
108.660  
105.707

55.562  
55.402

40.104  
39.892  
39.688  
39.477  
39.273  
39.061  
38.850

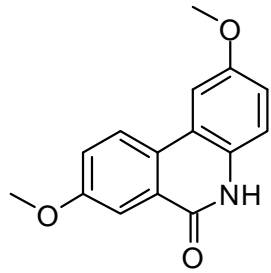

**5mb**  
DMSO-D6

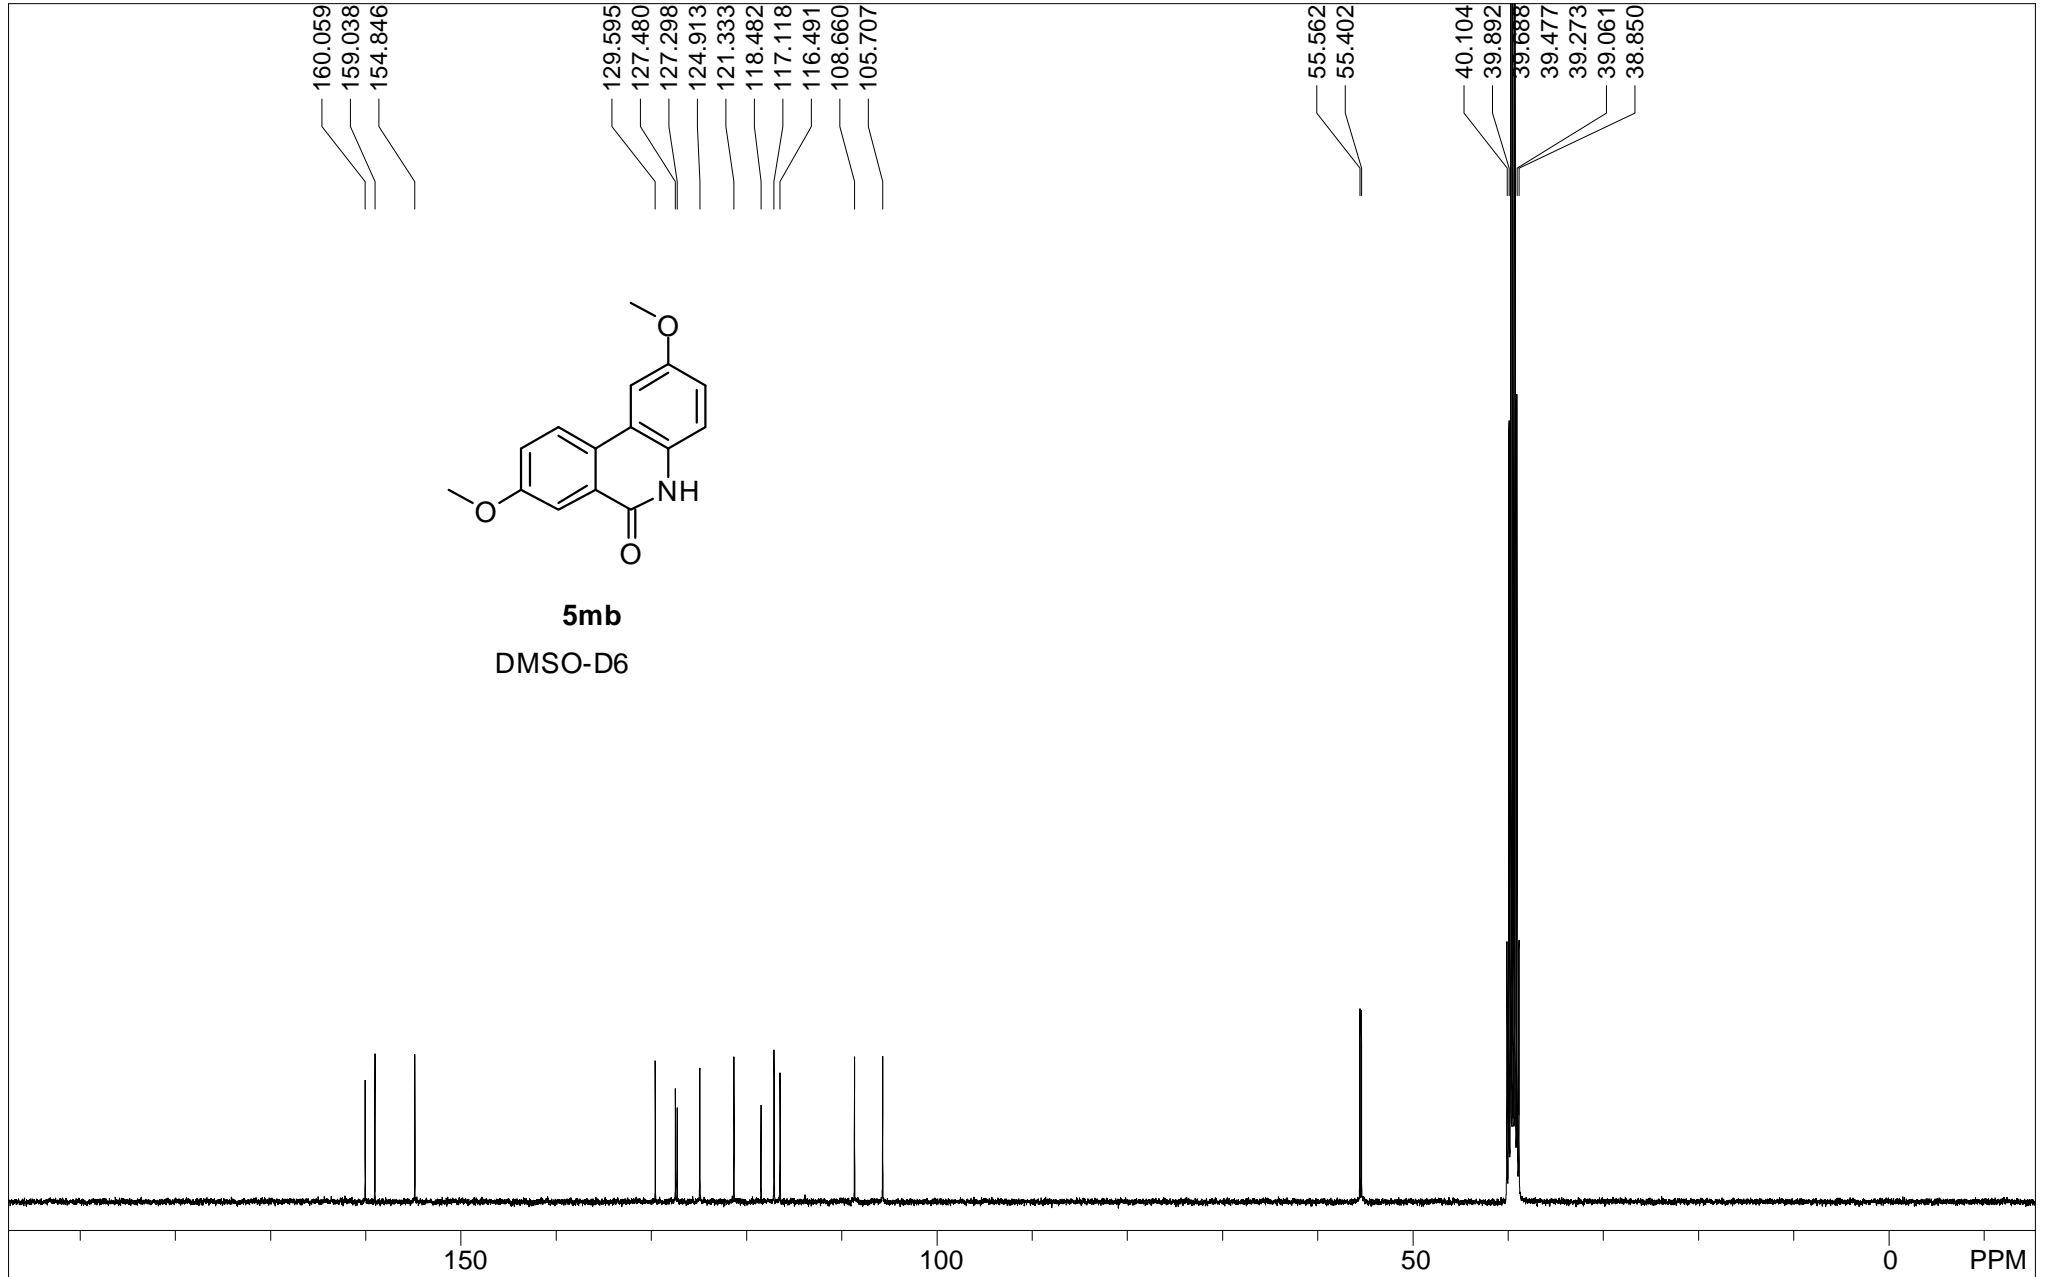

USER: fx -- DATE: 2017-06-13 23:13:35.762

|             |            |             |              |                                                            |
|-------------|------------|-------------|--------------|------------------------------------------------------------|
| F1: 100.620 | F2: 1.000  | SW1: 24038  | OF1: 10011.3 | PTS1d: 32768                                               |
| EX: zgpg30  | PW: 9.0 us | PD: 2.0 sec | NA: 1024     | LB: 1.0Nuts - \$SP-0011167-5mb-C13-DMSO-20170613-CT54 10.1 |

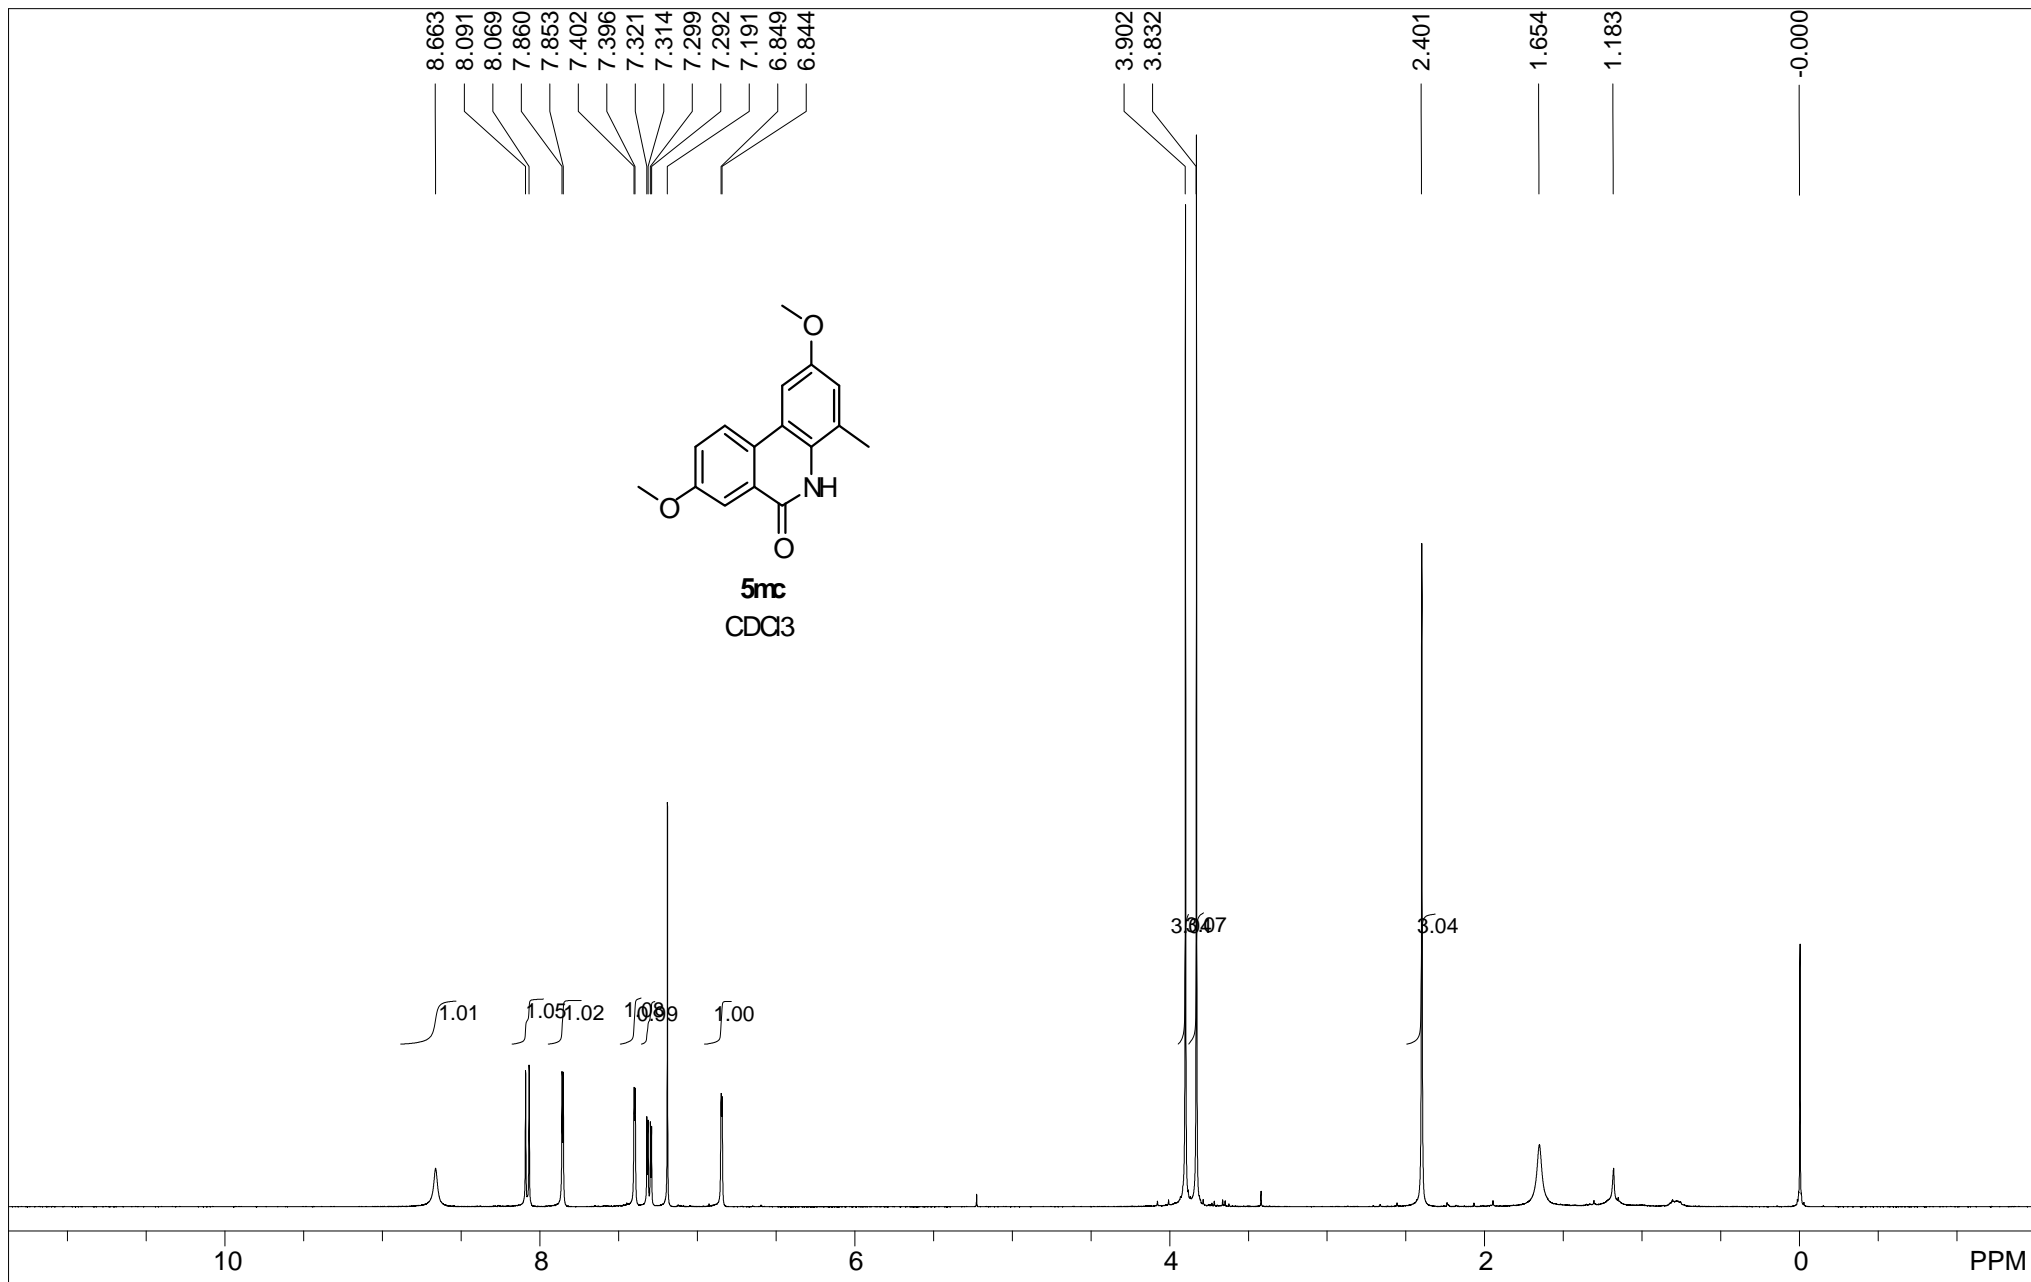

USER: fx -- DATE: 2017-06-26 13:13:21.571

|             |             |             |             |                            |
|-------------|-------------|-------------|-------------|----------------------------|
| F1: 400.160 | F2: 1.000   | SW1: 8224   | OF1: 3165.3 | PTS1d: 65536               |
| EX: zg30    | PW: 12.8 us | PD: 1.0 sec | NA: 16      | LB: 0.3                    |
|             |             |             |             | Nuts - \$5mc-H1-CDCl3 10.1 |



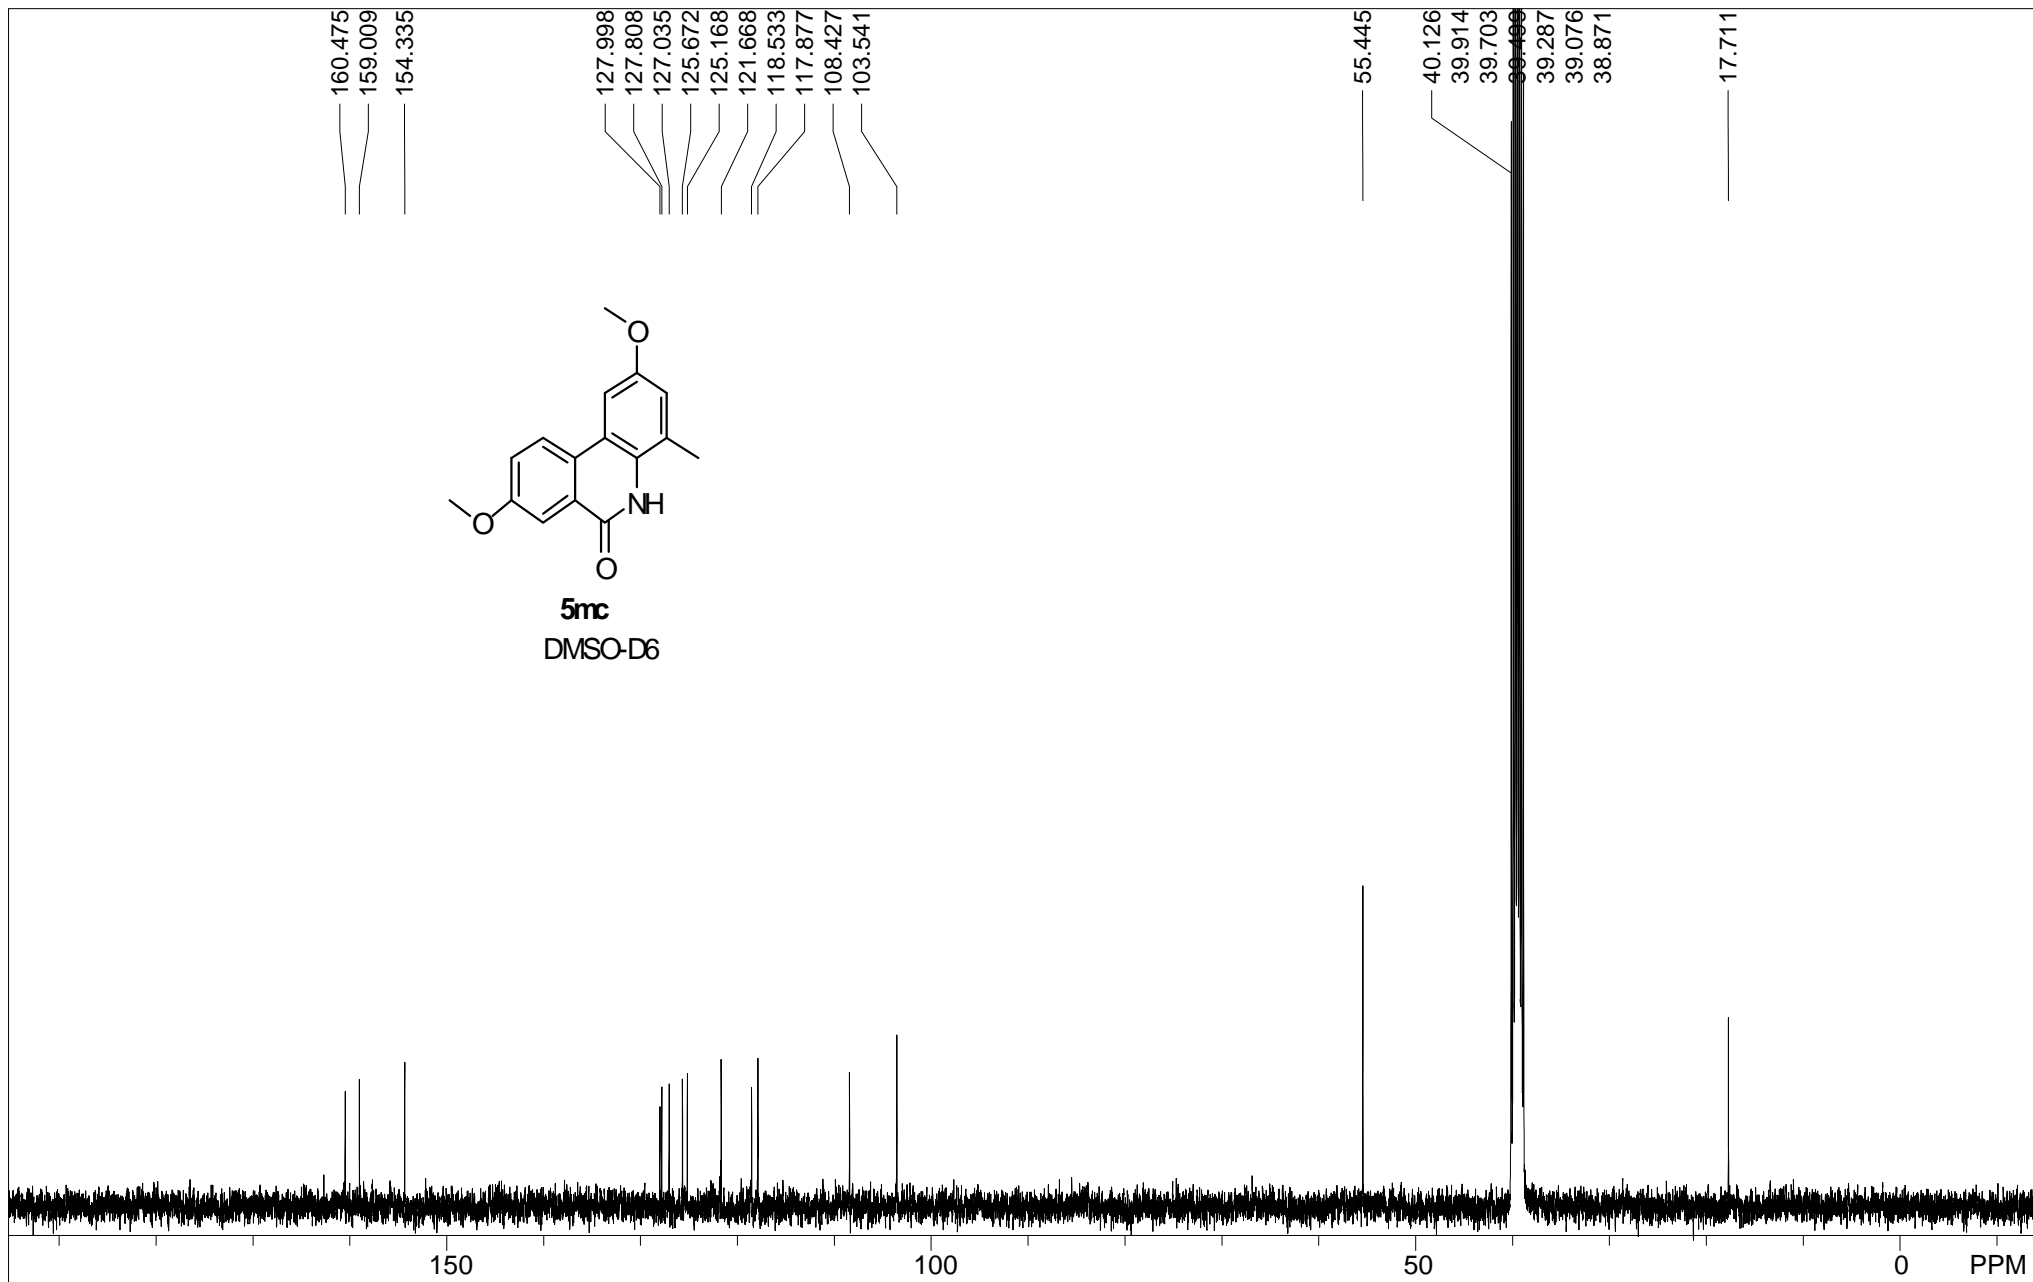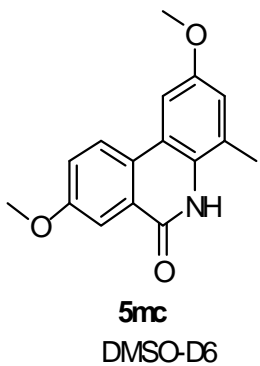

USER: fx -- DATE: 2017-06-27 00:58:21.709

|             |            |             |              |                                                             |
|-------------|------------|-------------|--------------|-------------------------------------------------------------|
| F1: 100.620 | F2: 1.000  | SW1: 24038  | OF1: 10011.3 | PTS1d: 32768                                                |
| EX: zgpg30  | PW: 9.0 us | PD: 2.0 sec | NA: 1024     | LB: 1.0Nuts - \$\$P-0011167-5mc-C13-DMSO-20170626-CT54 10.1 |

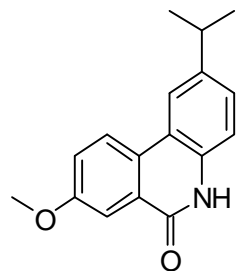

5mk

CDCl3

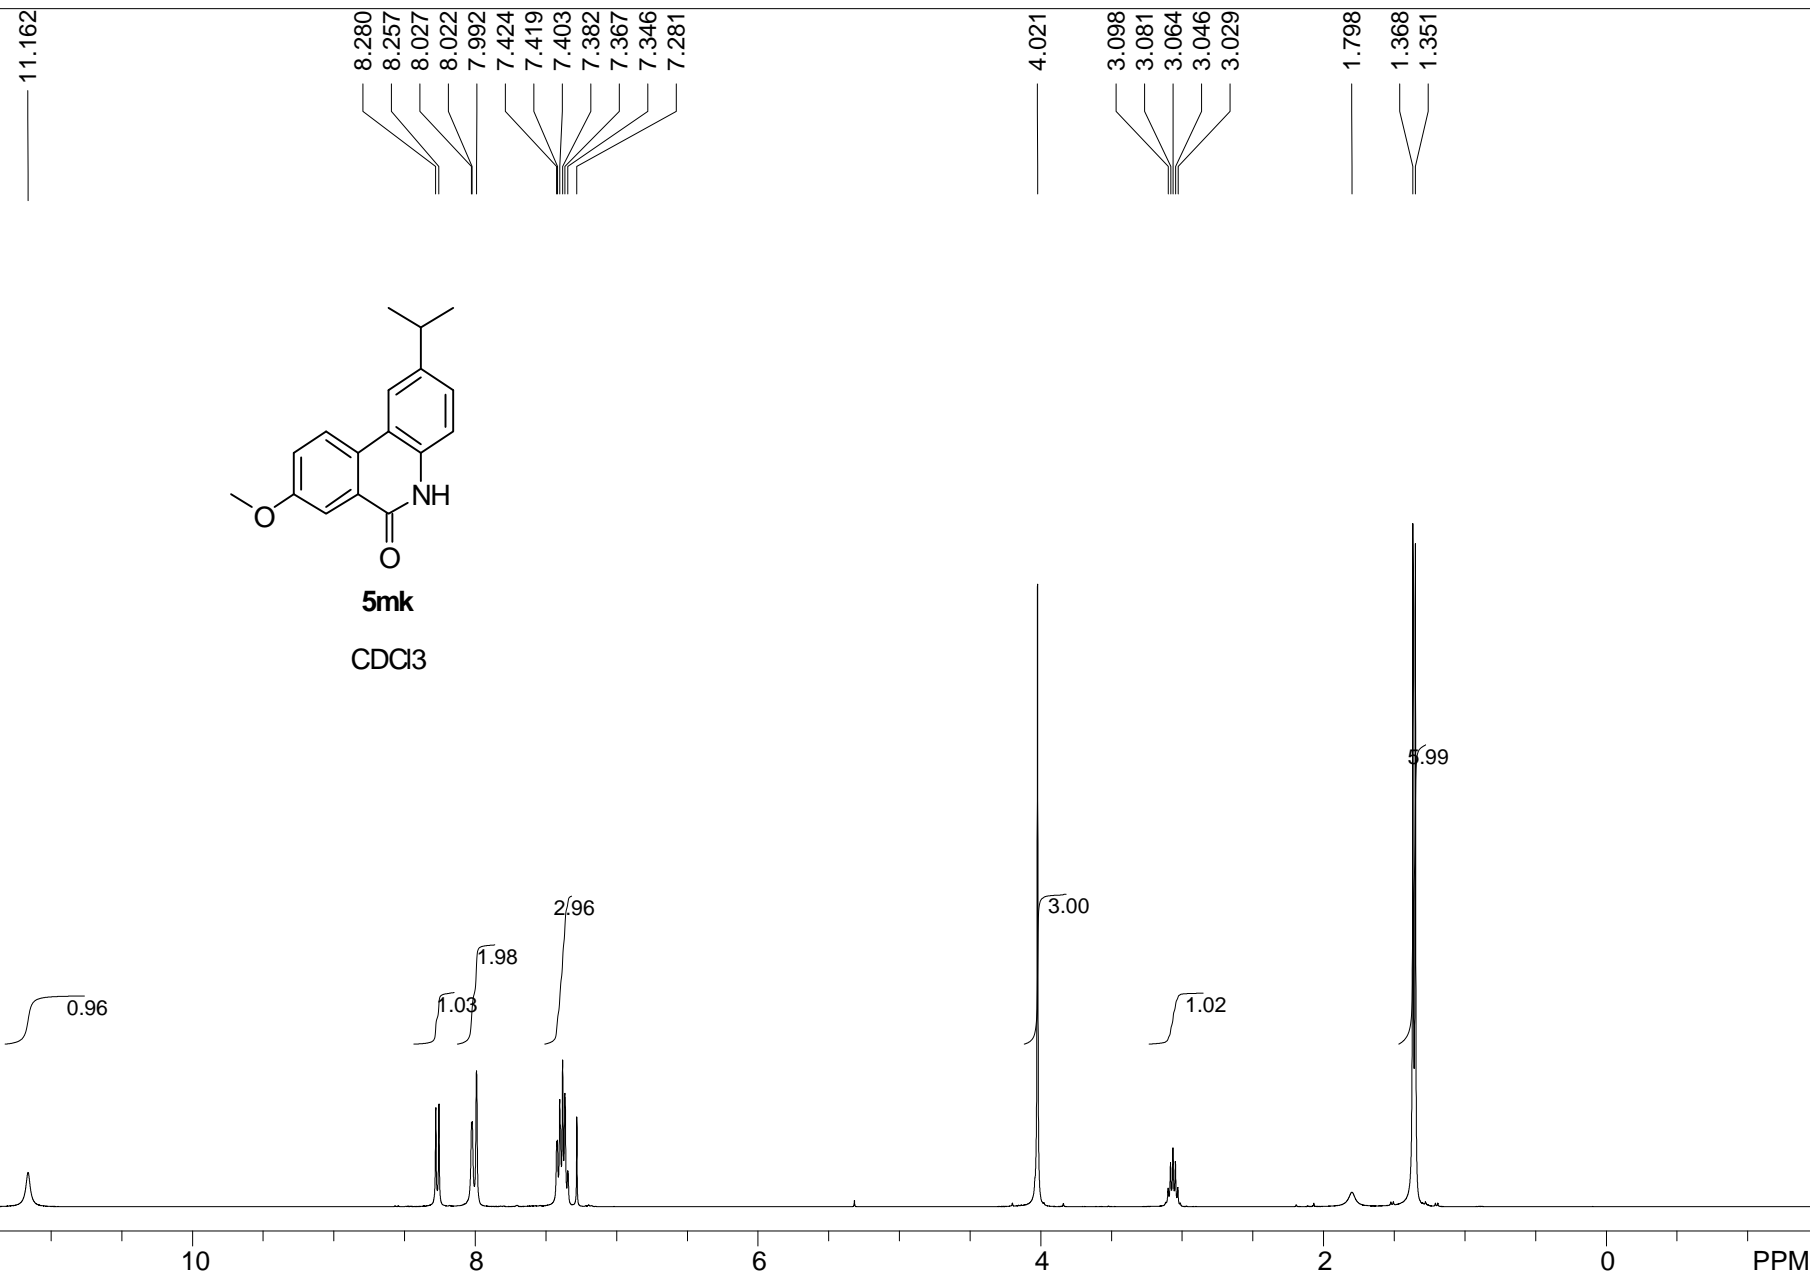

USER: fx -- DATE: 2017-06-27 09:47:08.096

F1: 400.160

F2: 1.000

SW1: 8224

OF1: 3201.3

PTS1d: 65536

EX: zg30

PW: 12.8 us

PD: 1.0 sec

NA: 16

LB: 0.3

Nuts - \$5mk-H1-CDCl3 10.1

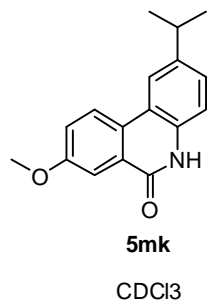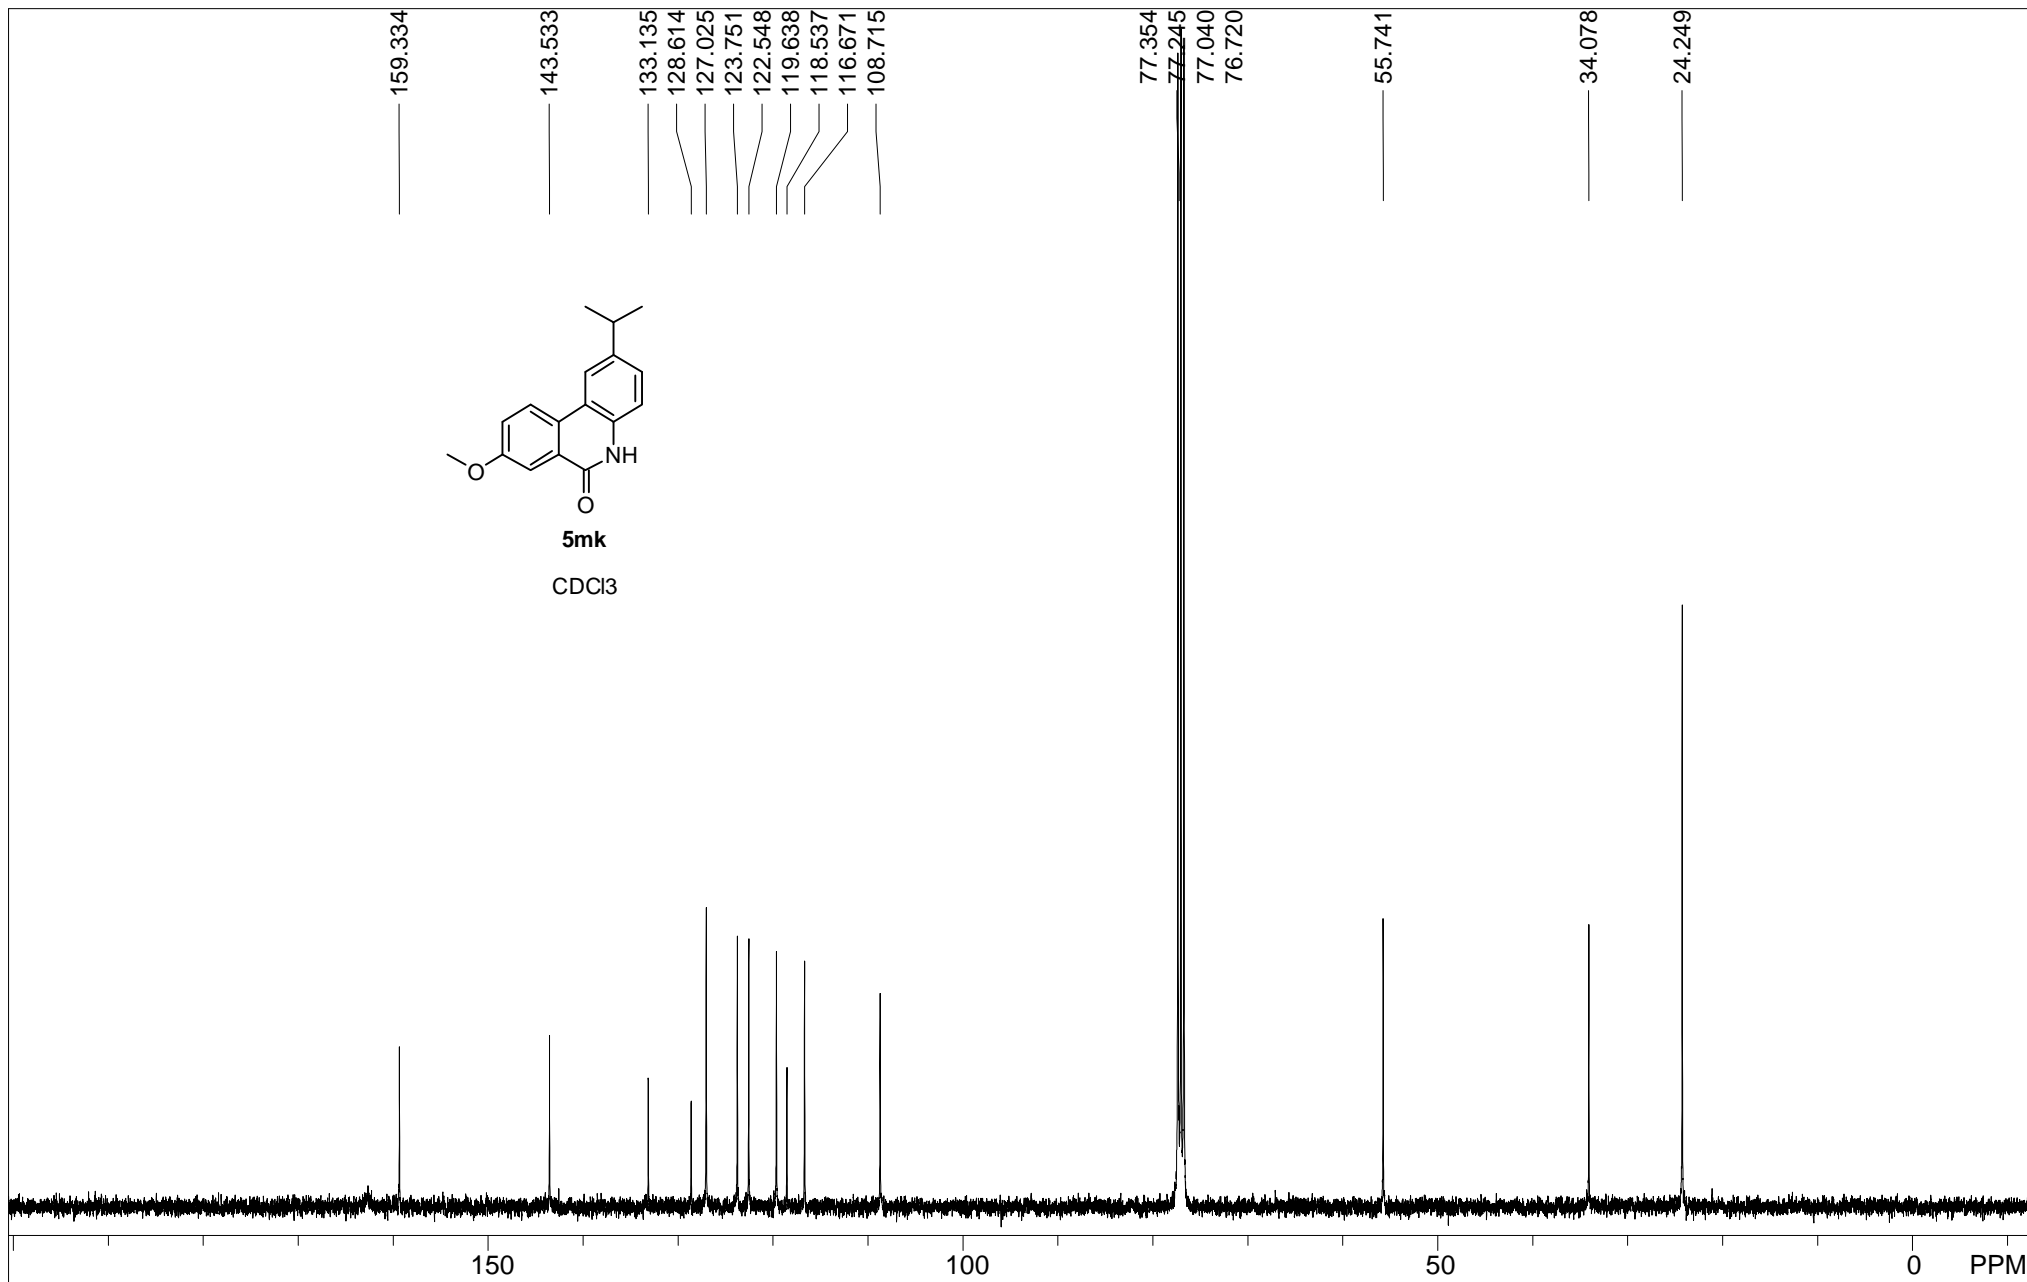

USER: fx -- DATE: 2017-06-27 21:36:55.820

|             |            |             |              |                                                             |
|-------------|------------|-------------|--------------|-------------------------------------------------------------|
| F1: 100.620 | F2: 1.000  | SW1: 24038  | OF1: 10061.6 | PTS1d: 32768                                                |
| EX: zgpg30  | PW: 9.0 us | PD: 2.0 sec | NA: 1024     | LB: 1.0Nuts - \$SP-0011167-5mk-C13-CDC13-20170627-CT54 10.1 |

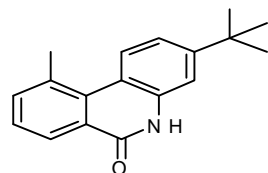

5nj

DMSO-D6

11.577

8.397  
8.375  
8.303  
8.285  
7.702  
7.684  
7.526  
7.507  
7.488  
7.454  
7.450  
7.336  
7.331  
7.314  
7.309  
5.758

3.336  
3.088  
3.072  
2.920  
2.505

1.337  
1.229  
1.203  
1.185  
1.167

0.96

1.02  
1.02  
1.01  
1.98  
0.97

3.00

8.85

12 10 8 6 4 2 0 PPM

USER: fx -- DATE: 2017-06-30 10:46:17.194

|             |             |             |             |                                                            |
|-------------|-------------|-------------|-------------|------------------------------------------------------------|
| F1: 400.160 | F2: 1.000   | SW1: 8224   | OF1: 3199.4 | PTS1d: 65536                                               |
| EX: zg30    | PW: 12.8 us | PD: 1.0 sec | NA: 16      | LB: 0.3 Nuts - \$SP-0011167-5NJ-H1-DMSO-20170630-CT54 10.1 |

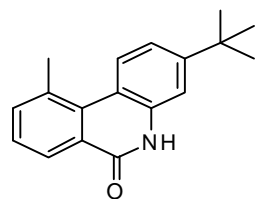

5nj

DMSO-D6

160.978  
151.477  
136.872  
136.813  
134.866  
133.211  
127.115  
127.057  
126.780  
125.992  
119.255  
116.418  
112.671

40.111  
39.900  
39.695  
39.484  
39.280  
39.068  
38.857  
34.358  
30.829  
25.528

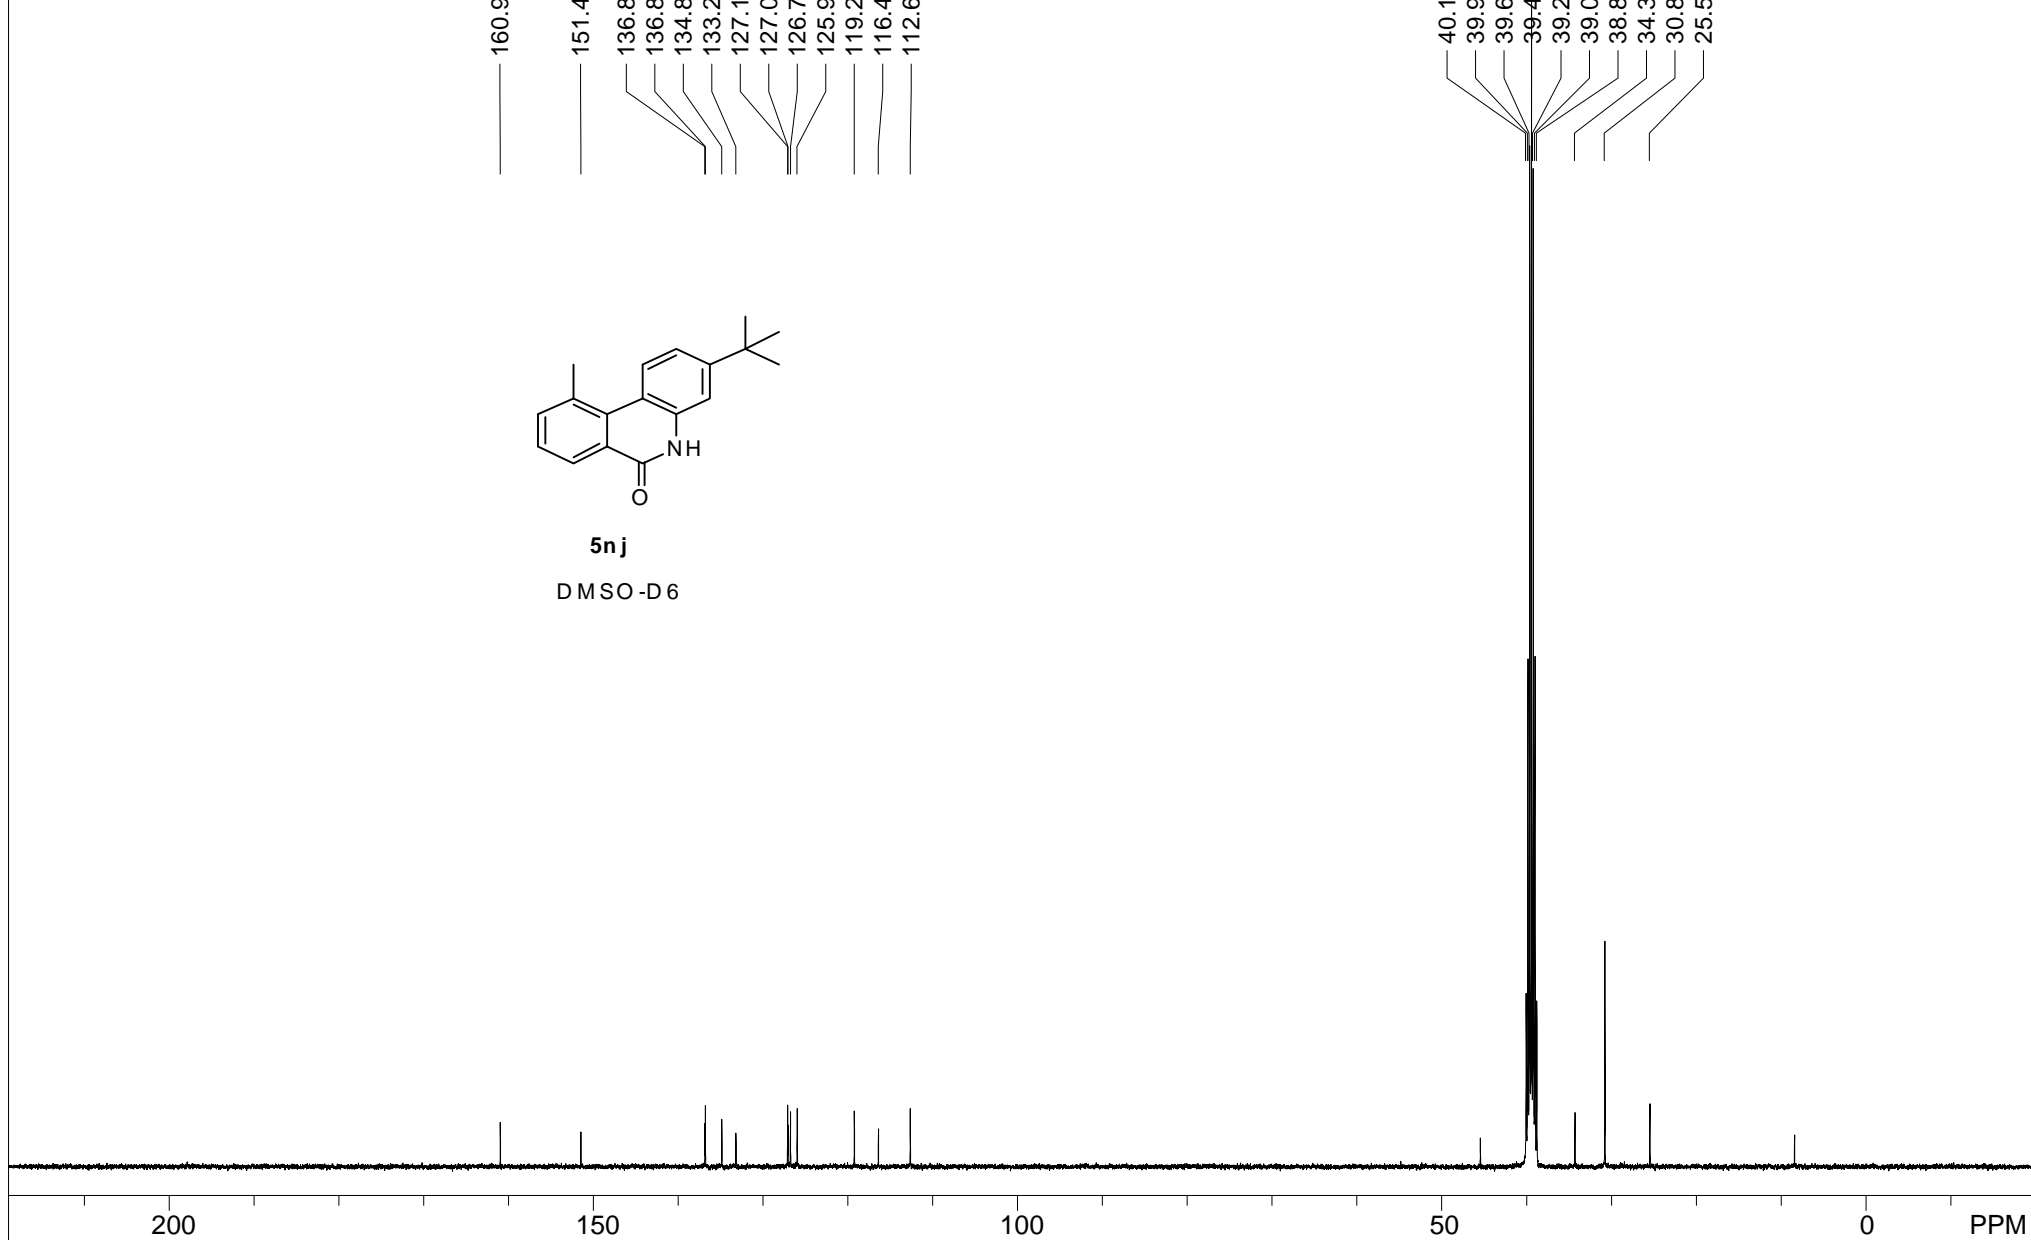

USER: fx -- DATE: 2017-07-01 03:00:19.396

|             |            |             |              |                                                            |
|-------------|------------|-------------|--------------|------------------------------------------------------------|
| F1: 100.620 | F2: 1.000  | SW1: 24038  | OF1: 10011.3 | PTS1d: 32768                                               |
| EX: zgpg30  | PW: 9.0 us | PD: 2.0 sec | NA: 1024     | LB: 1.0Nuts - \$SP-0011167-5NJ-C13-DMSO-20170630-CT54 10.1 |

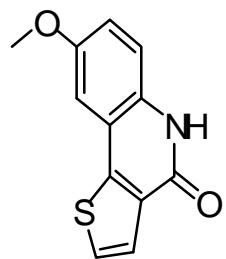

**5b**

DMSO-D6

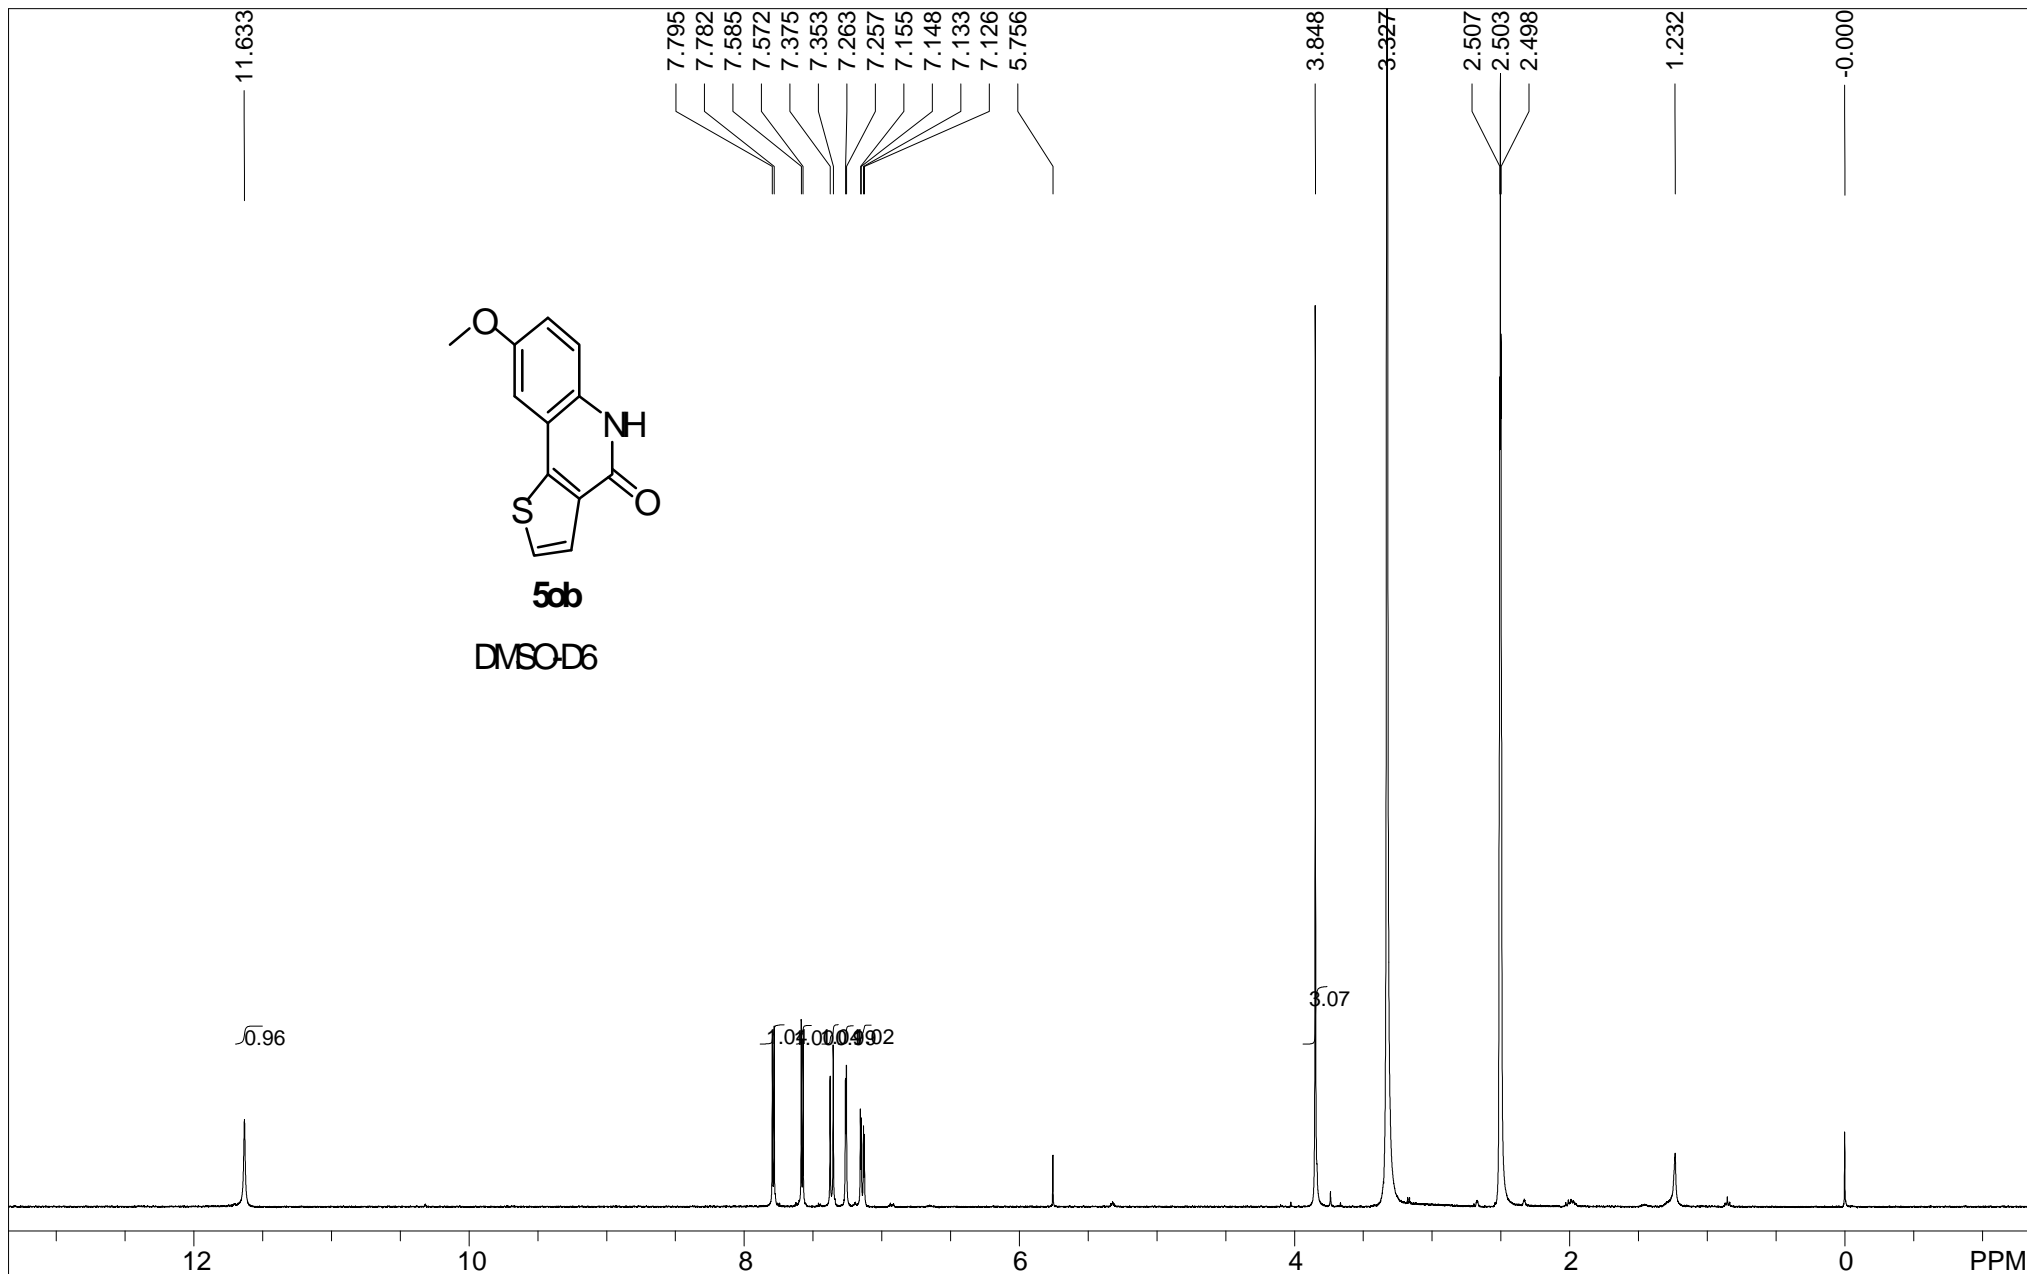

USER: fx -- DATE: 2017-07-04 11:30:08.715

|             |             |             |             |              |
|-------------|-------------|-------------|-------------|--------------|
| F1: 400.160 | F2: 1.000   | SW1: 8224   | OF1: 3198.6 | PTS1d: 65536 |
| EX: zg30    | PW: 12.8 us | PD: 1.0 sec | NA: 16      | LB: 0.3      |

Nuts - \$5ob-H1-DMSO 10.1

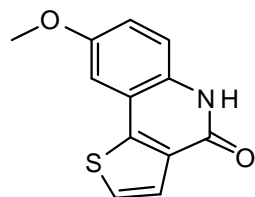

**5ob**  
DMSO-D6

157.726  
154.590  
145.097  
131.381  
130.440  
126.700  
125.329  
118.176  
117.563  
116.783  
105.233  
55.606  
40.126  
39.914  
39.703  
39.499  
39.287  
39.076  
38.871

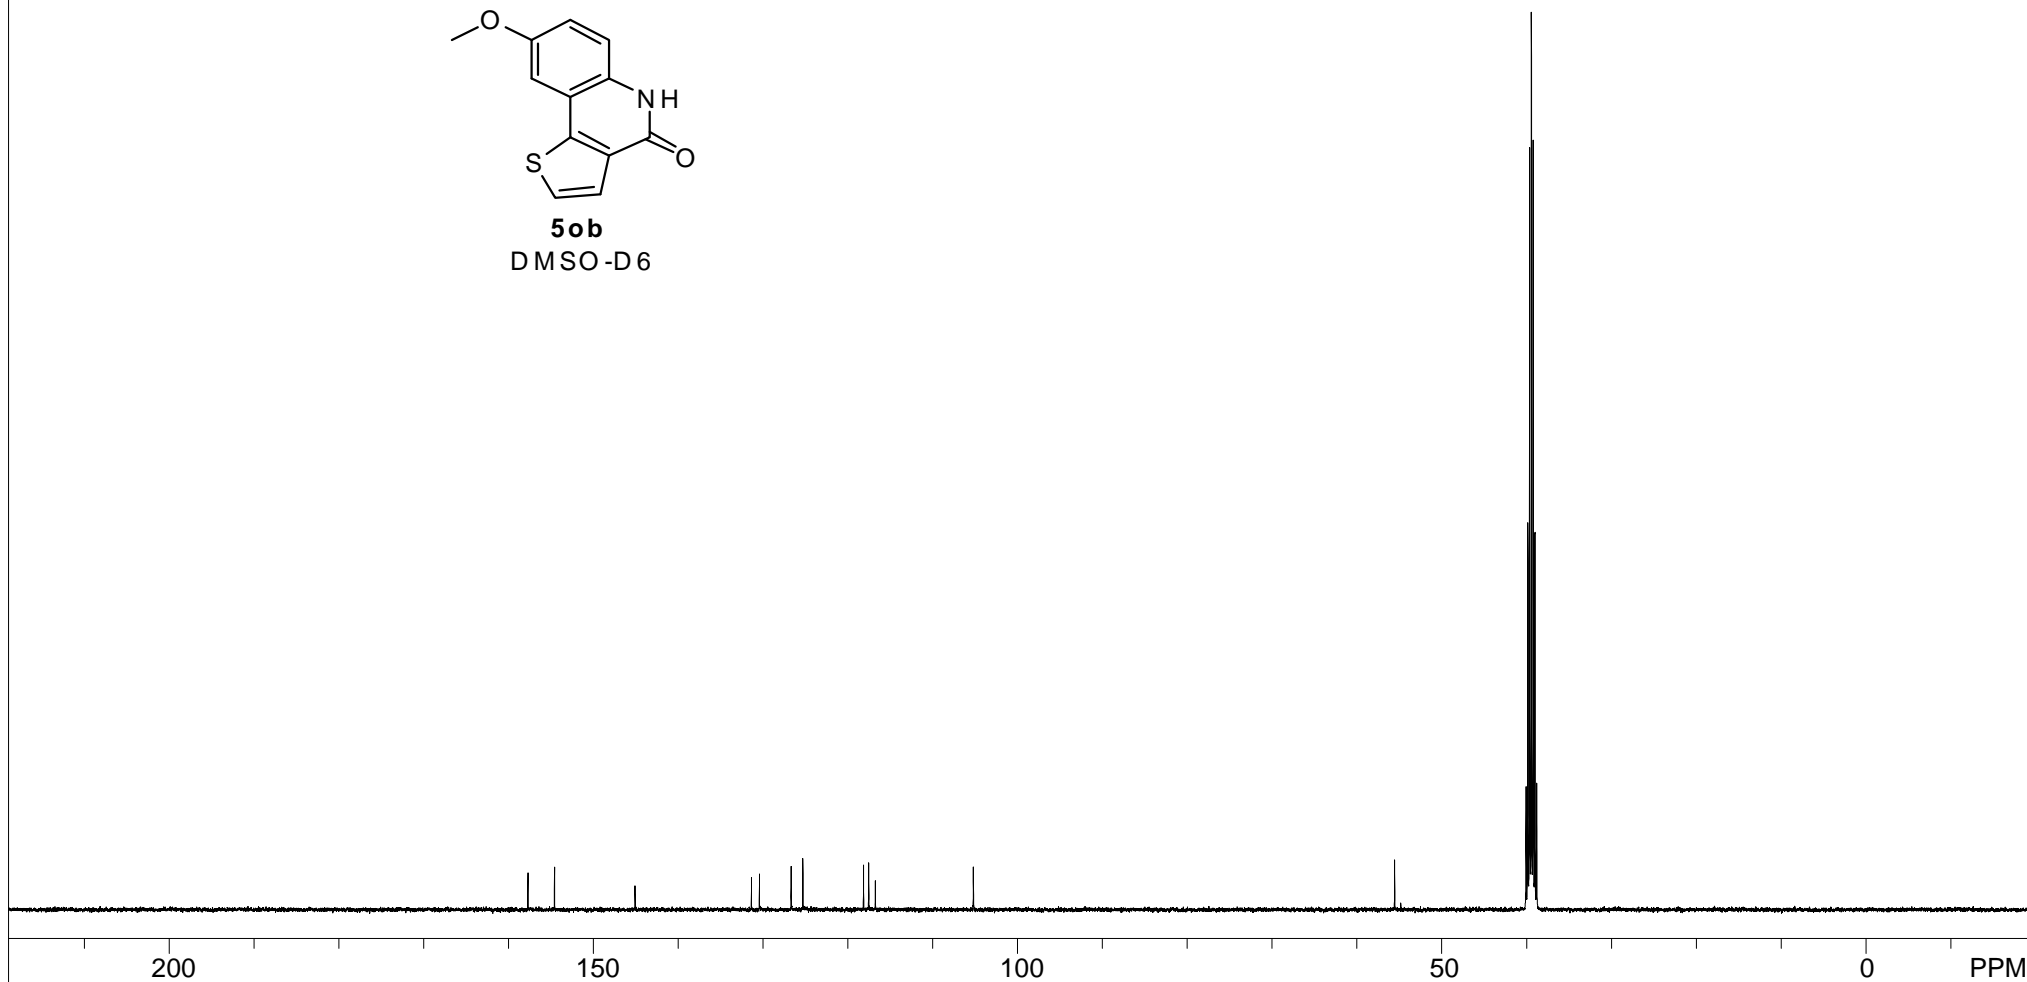

USER: fx -- DATE: 2017-07-04 21:50:03.485

|             |            |             |              |                                                             |
|-------------|------------|-------------|--------------|-------------------------------------------------------------|
| F1: 100.620 | F2: 1.000  | SW1: 24038  | OF1: 10011.3 | PTS1d: 32768                                                |
| EX: zgpg30  | PW: 9.0 us | PD: 2.0 sec | NA: 1024     | LB: 1.0Nuts - \$\$P-0011167-50B-C13-DMSO-20170704-CT54 10.1 |

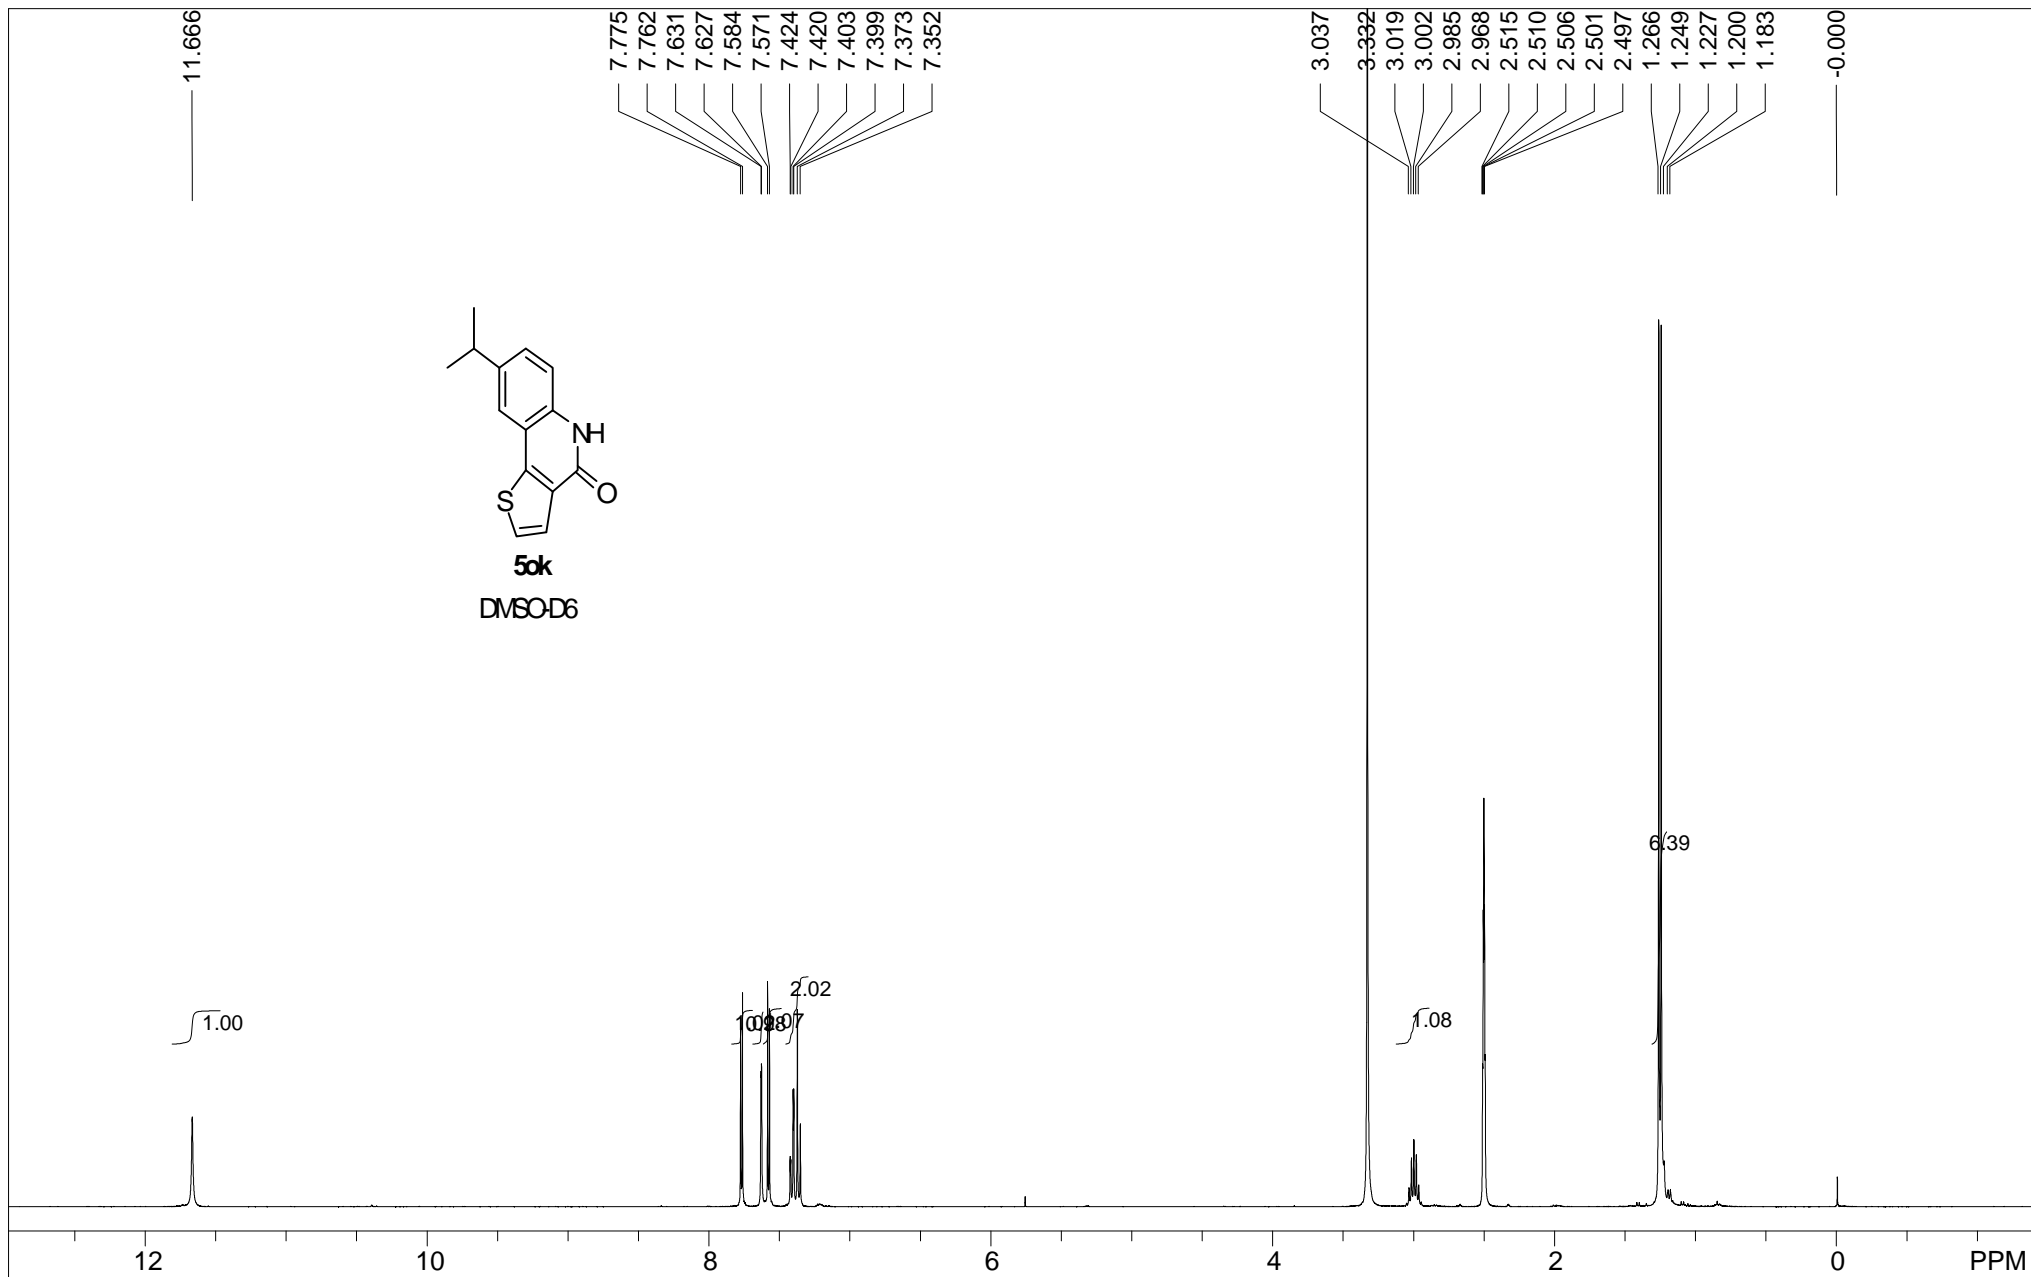

USER: fx -- DATE: 2017-07-07 11:54:59.569

|             |             |             |             |                           |
|-------------|-------------|-------------|-------------|---------------------------|
| F1: 400.160 | F2: 1.000   | SW1: 8224   | OF1: 3199.9 | PTS1d: 65536              |
| EX: zg30    | PW: 12.8 us | PD: 1.0 sec | NA: 16      | LB: 0.3                   |
|             |             |             |             | Nuts - \$5ok-H1-DMSO 10.1 |



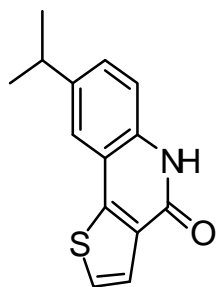

5ok

DMSO-D6

158.061  
145.563  
142.668  
134.407  
131.053  
127.910  
126.372  
125.256  
120.283  
116.251  
116.105

40.118  
39.914  
39.703  
39.491  
39.287  
39.076  
38.864  
32.907  
23.880

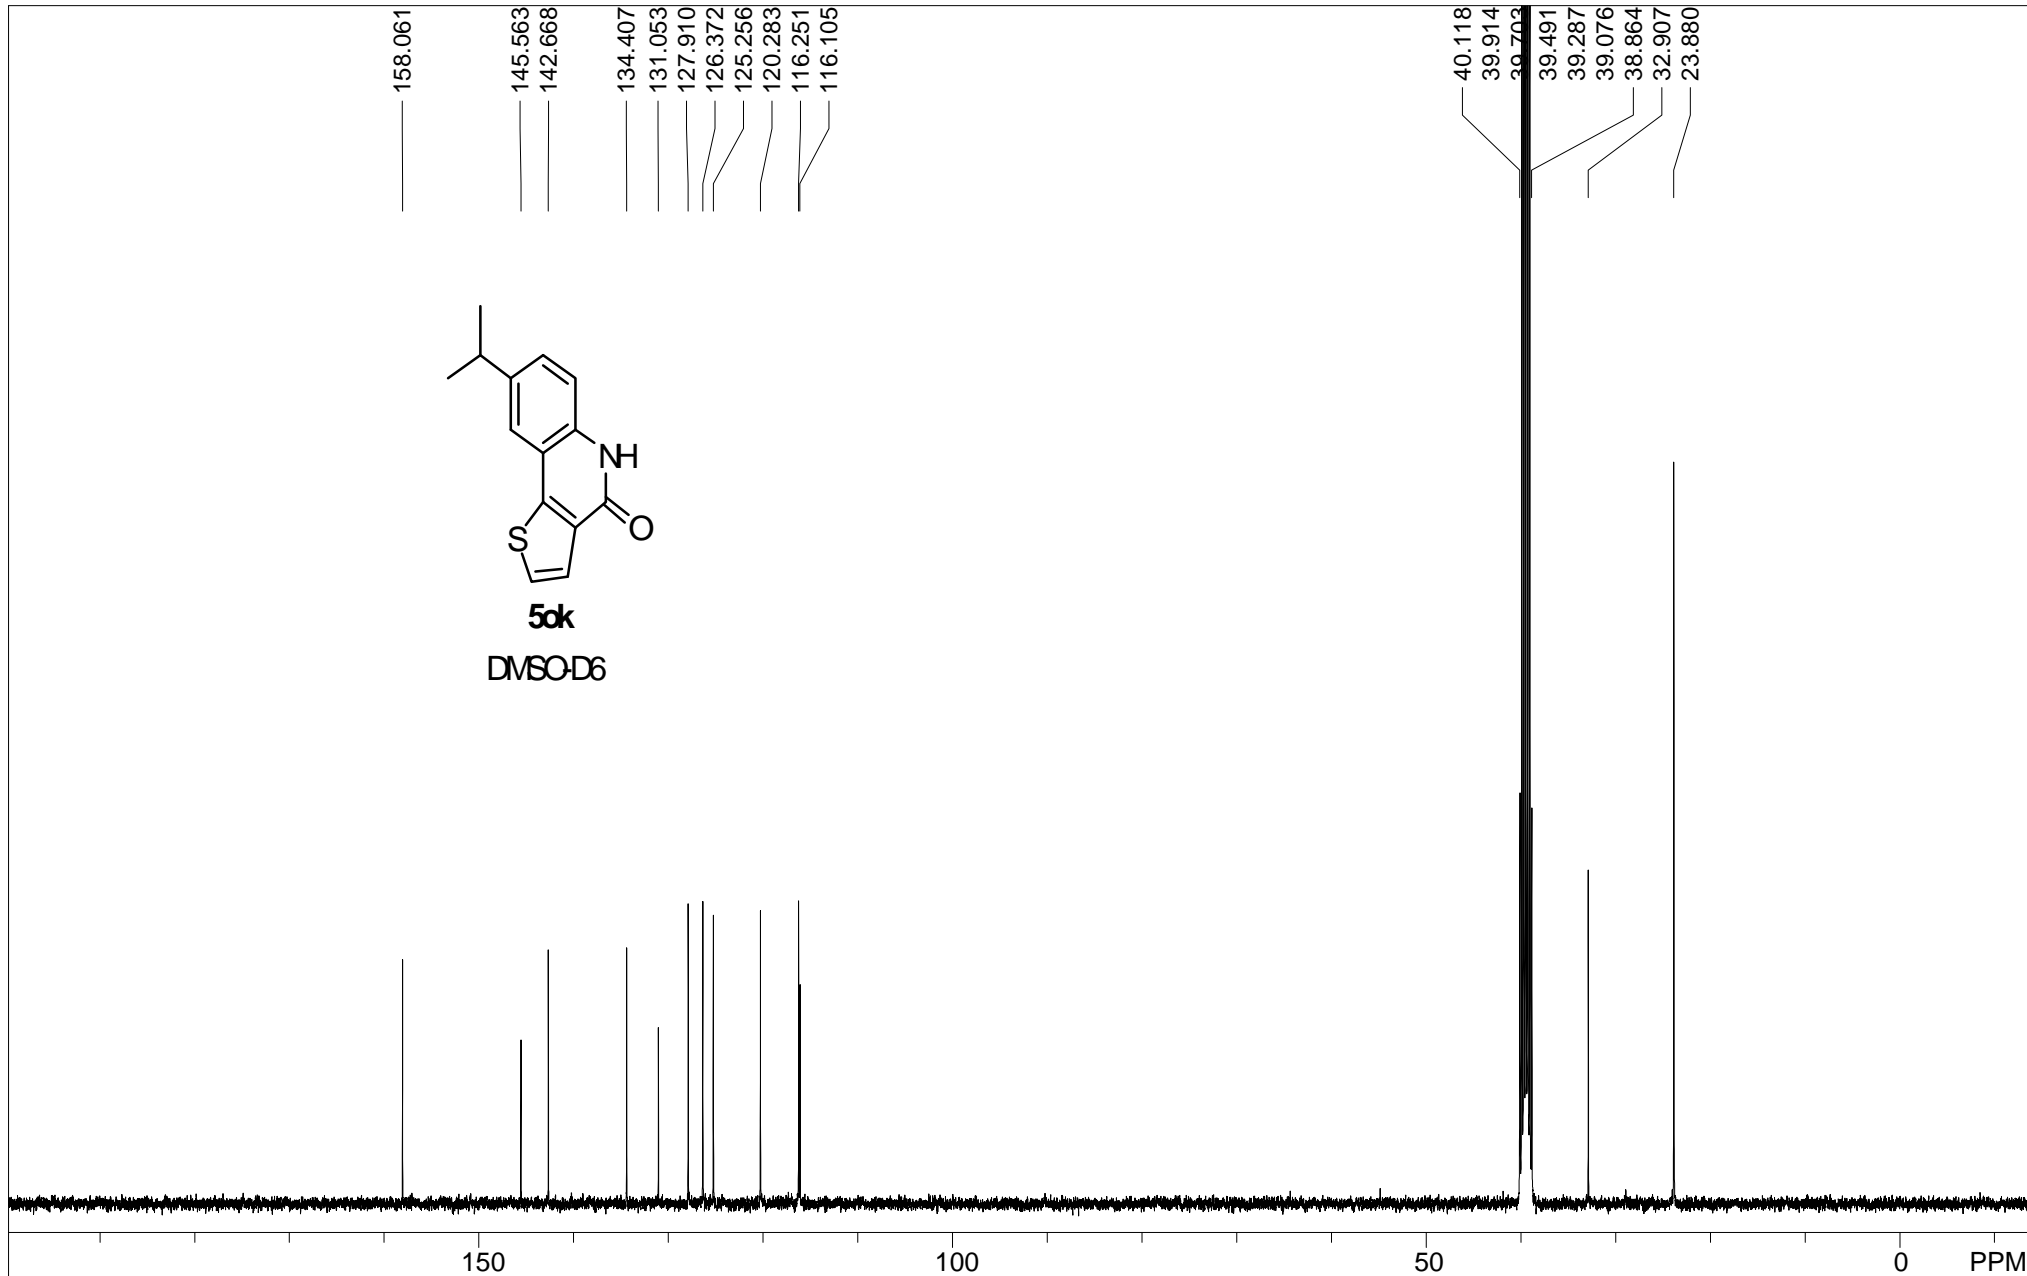

USER: fx -- DATE: 2017-07-11 03:44:16.582

|             |            |             |              |                                                             |
|-------------|------------|-------------|--------------|-------------------------------------------------------------|
| F1: 100.620 | F2: 1.000  | SW1: 24038  | OF1: 10011.3 | PTS1d: 32768                                                |
| EX: zpgg30  | PW: 9.0 us | PD: 2.0 sec | NA: 1024     | LB: 1.0 Nuts - \$SP-0011167-5ok-C13-DMSO-20170710-CT54 10.1 |

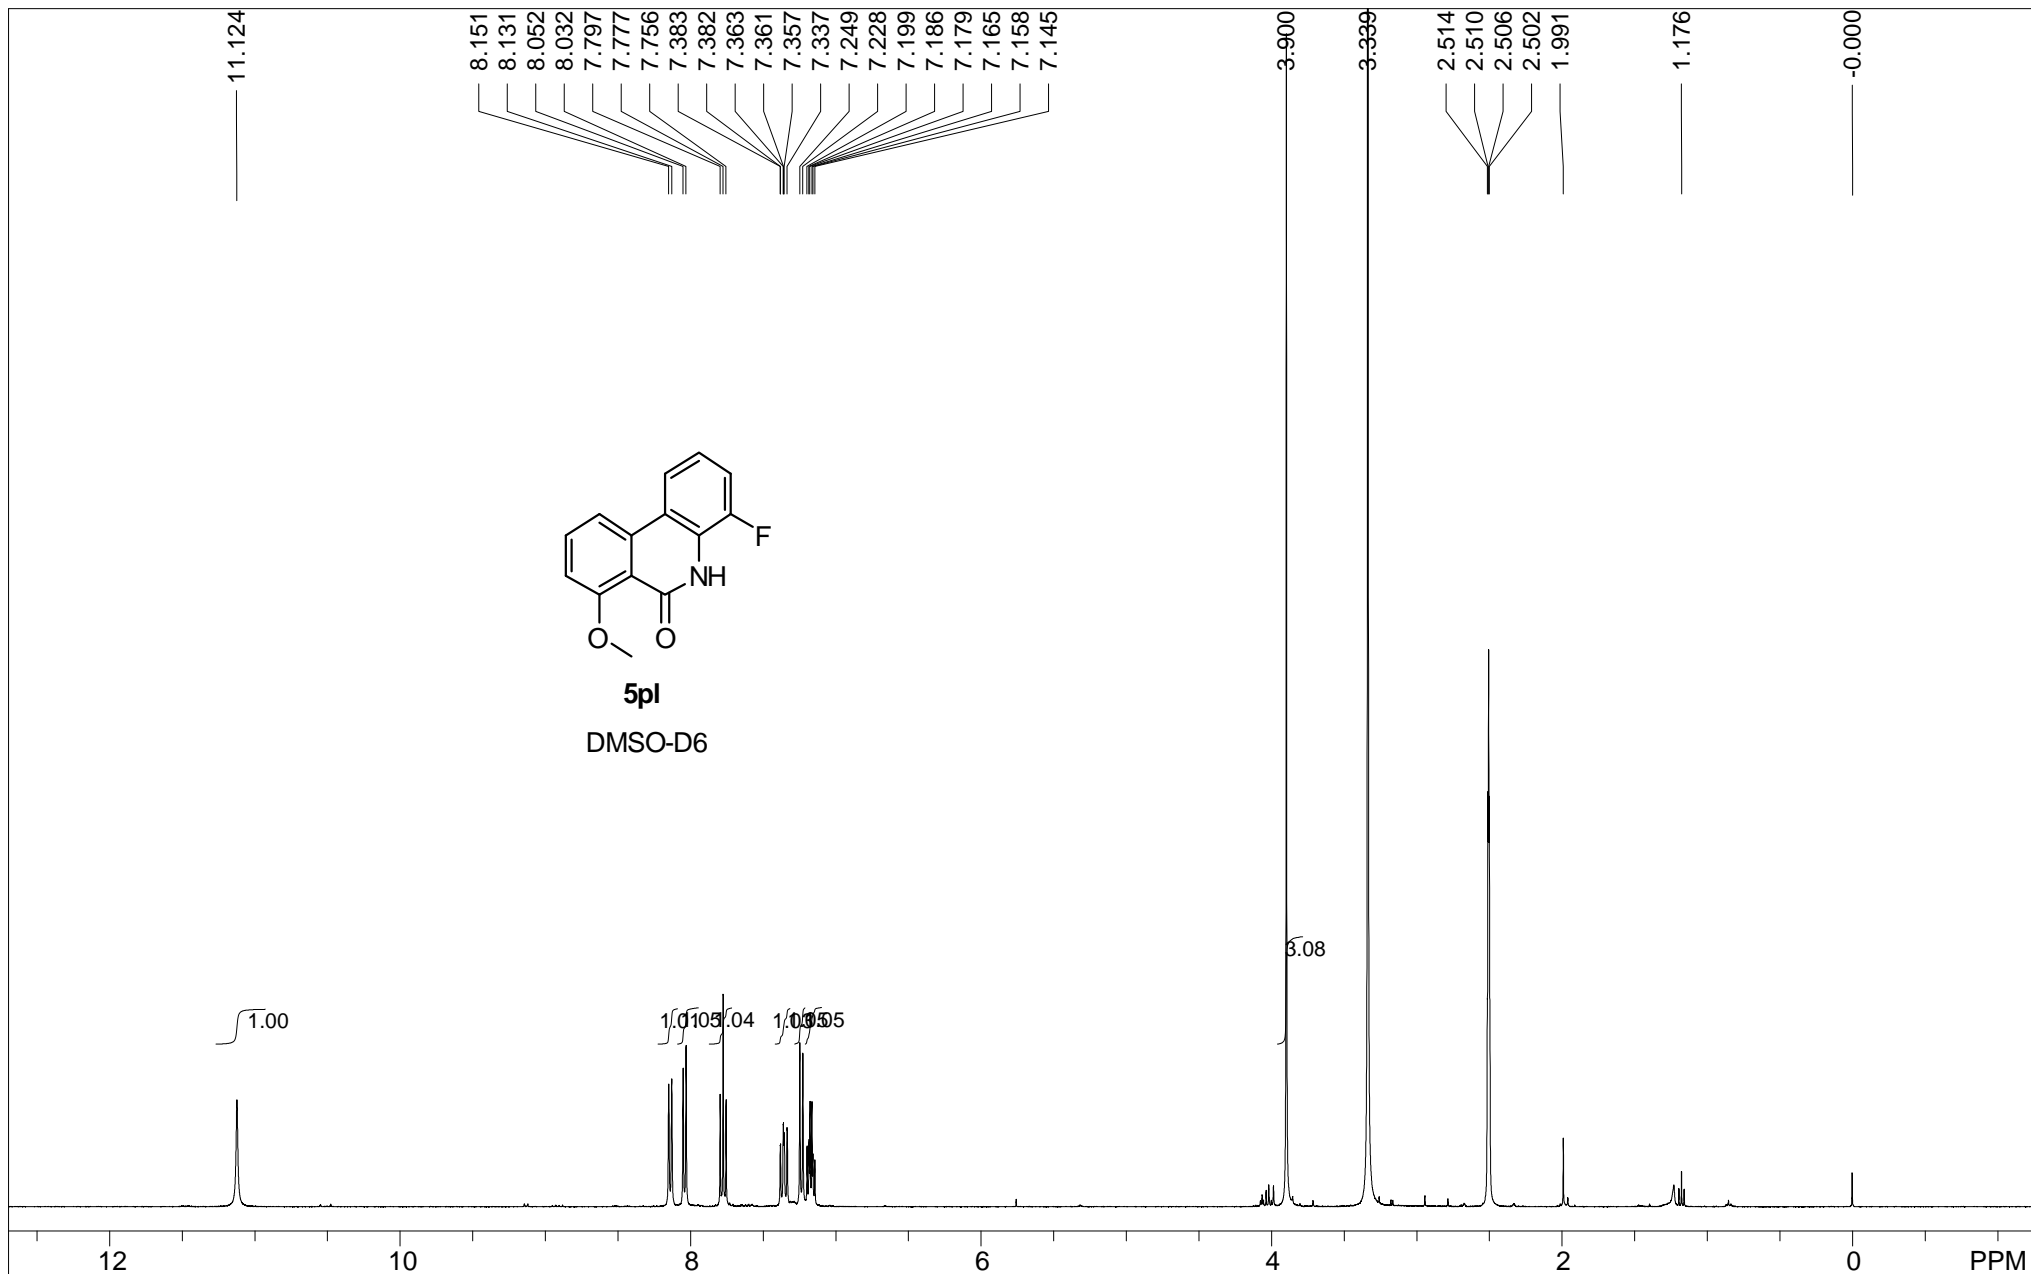

USER: fx -- DATE: 2017-07-10 10:26:18.881

|             |             |             |             |                           |
|-------------|-------------|-------------|-------------|---------------------------|
| F1: 400.160 | F2: 1.000   | SW1: 8224   | OF1: 3201.1 | PTS1d: 65536              |
| EX: zg30    | PW: 12.8 us | PD: 1.0 sec | NA: 16      | LB: 0.3                   |
|             |             |             |             | Nuts - \$5pl-H1-DMSO 10.1 |

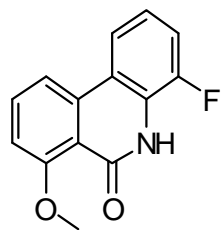

**5pl**  
DMSO-D6

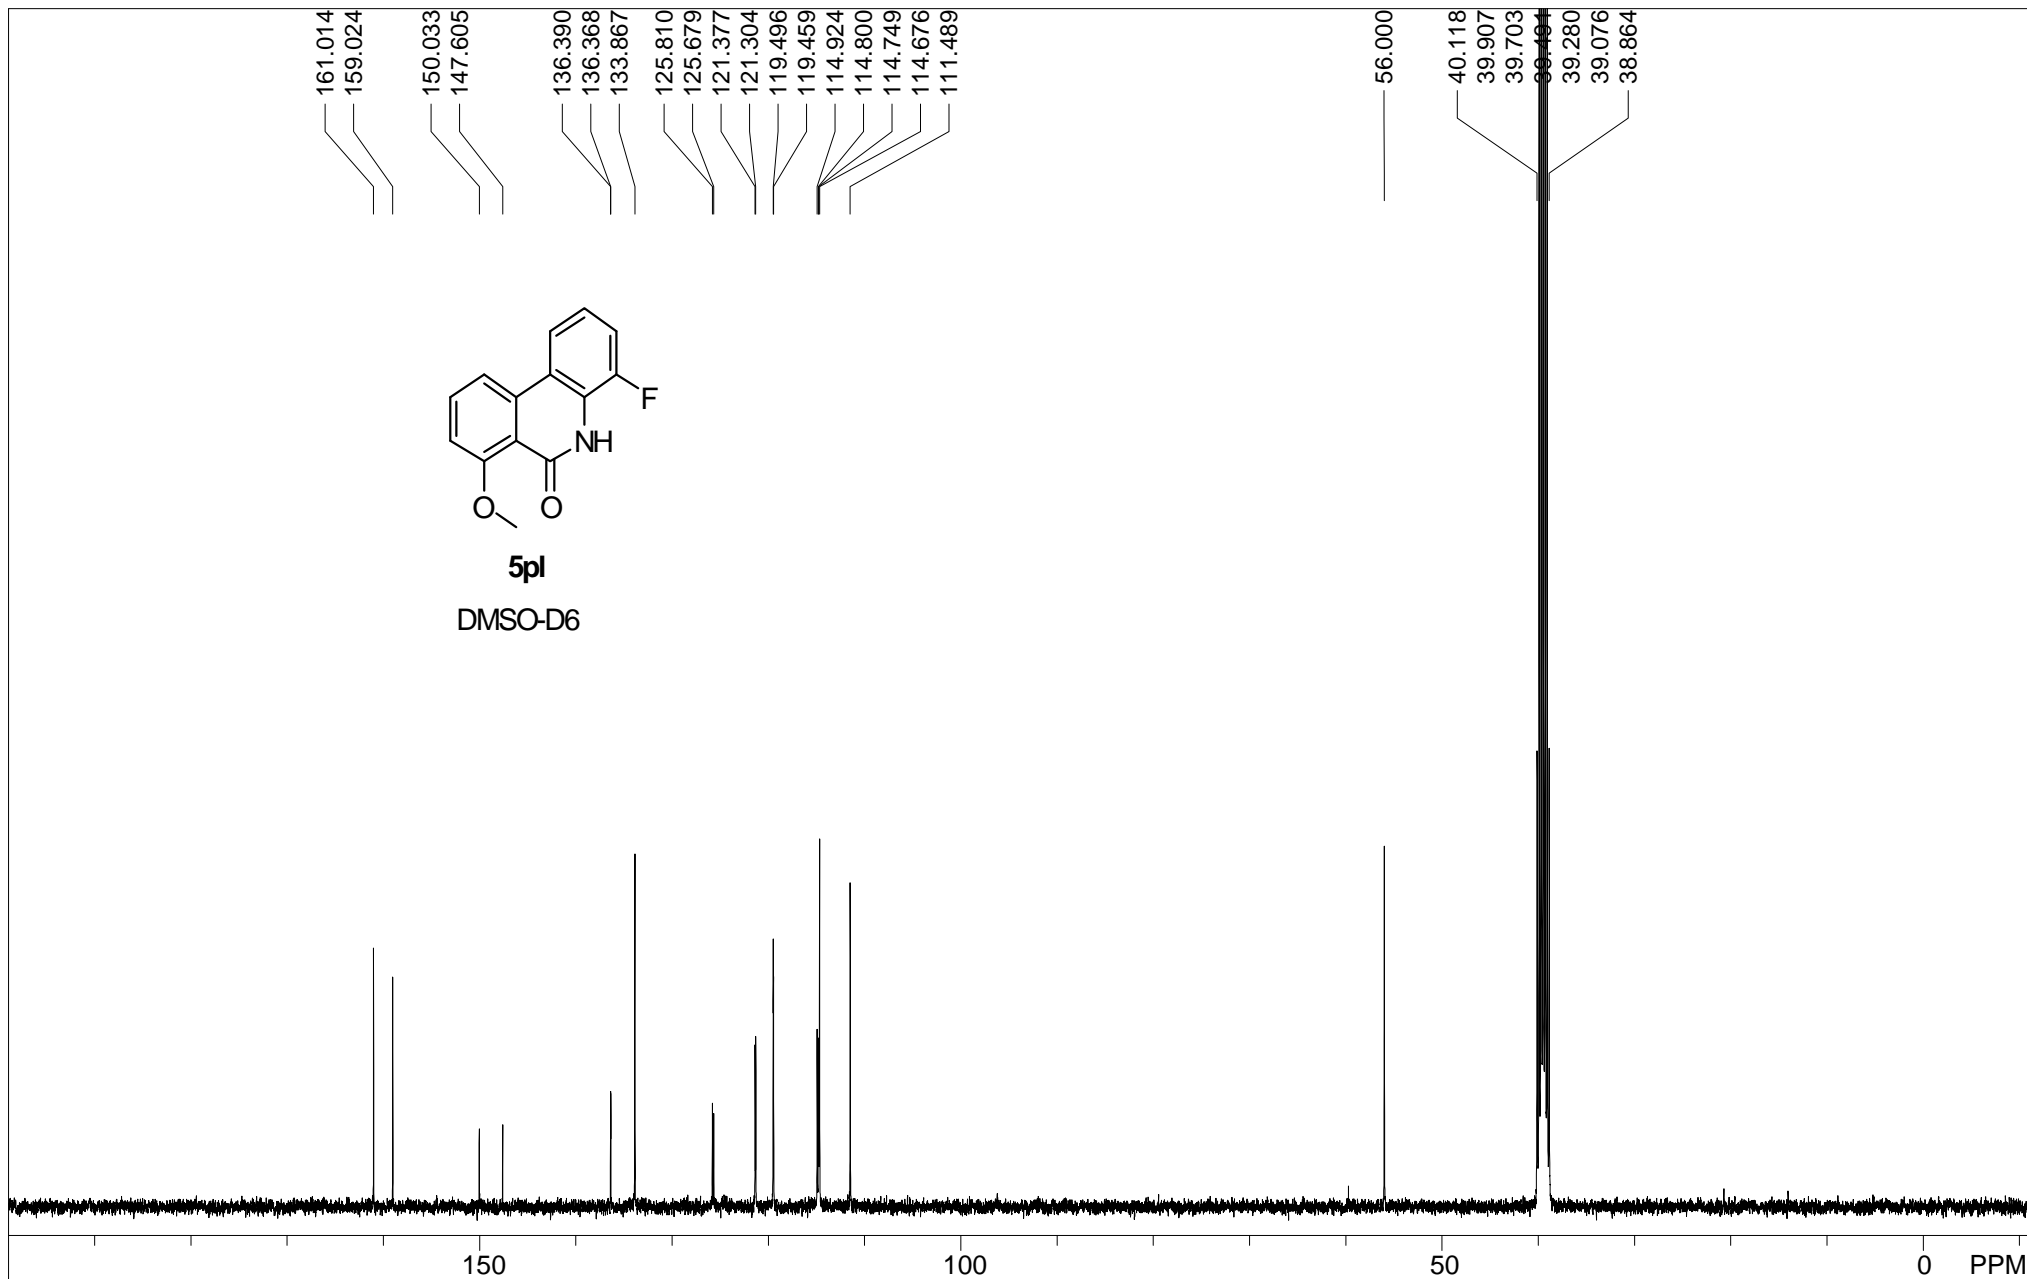

USER: fx -- DATE: 2017-07-11 02:42:59.890

|             |            |             |              |                                                             |
|-------------|------------|-------------|--------------|-------------------------------------------------------------|
| F1: 100.620 | F2: 1.000  | SW1: 24038  | OF1: 10011.3 | PTS1d: 32768                                                |
| EX: zpgp30  | PW: 9.0 us | PD: 2.0 sec | NA: 1024     | LB: 1.0 Nuts - \$SP-0011167-5pl-C13-DMSO-20170710-CT54 20.1 |
